# Supplementary material
Source: PubMed Central journal article supplement (PMC4788392)
Supplement: NIHMS752503-supplement-SI.pdf [file NIHMS752503-supplement-SI.pdf]

Mechanism of Lithium Diisopropylamide-Mediated Ortholithiation of  
1,4-bis(Trifluoromethyl)benzene under Nonequilibrium Conditions:  
Condition-Dependent Rate Limitation  
and  
Lithium Chloride-Catalyzed Inhibition

Jun Liang, Alexander C. Hoepker, Russell F. Algera, Yun Ma,  
and David B. Collum\*

Contribution from the Department of Chemistry and Chemical Biology  
Baker Laboratory, Cornell University, Ithaca, New York 14853-1301

|                                                                                                                                                                                                                                                               |     |
|---------------------------------------------------------------------------------------------------------------------------------------------------------------------------------------------------------------------------------------------------------------|-----|
| <b>Part 1: Experimental Procedures</b>                                                                                                                                                                                                                        | S7  |
| -----                                                                                                                                                                                                                                                         |     |
| <b>Part 2: NMR Spectroscopic Studies</b>                                                                                                                                                                                                                      | S8  |
| -----                                                                                                                                                                                                                                                         |     |
| <b>Figure 1.</b> $^{19}\text{F}$ NMR spectrum of LDA (0.10 M) with <b>1</b> (0.050 M) in 12.2 M THF after aging for 10 minutes at $-78\text{ }^\circ\text{C}$ .                                                                                               | S8  |
| <b>Figure 2.</b> $^6\text{Li}$ NMR spectrum of $[^6\text{Li},^{15}\text{N}]\text{LDA}$ (0.10 M) and <b>1</b> (0.050 M) in 12.2 M THF recorded at $-78\text{ }^\circ\text{C}$ .                                                                                | S8  |
| <b>Figure 3.</b> $^{13}\text{C}\{^1\text{H}\}$ NMR spectrum of <b>2</b> generated from <b>1</b> (0.15 M) with $[^6\text{Li}]\text{LDA}$ (0.30 M, 2.0 equiv) in 12.2 M THF- $d_8$ at $-100\text{ }^\circ\text{C}$ .                                            | S9  |
| <b>Figure 4.</b> $^{13}\text{C}\{^{19}\text{F}\}$ NMR spectrum of <b>2</b> generated from <b>1</b> (0.15 M) with $[^6\text{Li}]\text{LDA}$ (0.30 M, 2.0 equiv) in 12.2 M THF- $d_8$ at $-100\text{ }^\circ\text{C}$ .                                         | S10 |
| <b>Figure 5.</b> $^{13}\text{C}\{^{19}\text{F}\}$ NMR spectrum of <b>2-<math>d_3</math></b> generated from <b>1-<math>d_4</math></b> (0.15 M) with $[^6\text{Li}]\text{LDA}$ (0.30 M) in 12.2 M THF- $d_8$ at $-100\text{ }^\circ\text{C}$ .                  | S11 |
| <b>Figure 6.</b> Plot of $\{[i\text{-Pr}_2\text{NH}][\text{ArLi}]\} / \{[\text{LDA}]^{(1/2)}[\text{ArH}]\}$ vs $[\text{THF}]$ for the ortholithiation of <b>1</b> (0.005 M) with LDA (0.10 M) and diisopropylamine (0.025 M) at $-78\text{ }^\circ\text{C}$ . | S12 |
| <b>Part 3: Rate Studies</b>                                                                                                                                                                                                                                   | S13 |
| -----                                                                                                                                                                                                                                                         |     |
| <b>Figure 7.</b> Representative in situ IR traces for the ortholithiation of <b>1</b> (0.005 M) by LDA (0.10 M) in THF at $-78\text{ }^\circ\text{C}$ .                                                                                                       | S13 |

|                                                                                                                                                                                                                      |     |
|----------------------------------------------------------------------------------------------------------------------------------------------------------------------------------------------------------------------|-----|
| <b>Figure 8.</b> Ortholithiation of <b>1</b> (0.09 M) with LDA (0.10 M) in 12.2 M THF at $-78\text{ }^{\circ}\text{C}$ with injection of 1.0 mol % LiCl.                                                             | S14 |
| <b>Figure 9.</b> Representative plot showing concentration of arene <b>1</b> vs time for the ortholithiation of <b>1</b> (0.005 M) with LDA (0.10 M) in 12.2 M THF at $-78\text{ }^{\circ}\text{C}$ .                | S14 |
| <b>Figure 10.</b> Representative plot showing poor exponential fit to the decay of ortholithiation of <b>1</b> (0.005 M) with LDA (0.10 M) in THF (12.2 M) at $-78\text{ }^{\circ}\text{C}$ .                        | S15 |
| <b>Figure 11.</b> Competitive ortholithiation of <b>1</b> (0.005 M) and <b>1-<i>d</i><sub>4</sub></b> (0.005 M) with LDA (0.10 M) in THF (12.2 M) at $-78\text{ }^{\circ}\text{C}$ .                                 | S16 |
| <b>Figure 12.</b> Competitive ortholithiation of <b>1</b> (0.005 M) and <b>1-<i>d</i><sub>4</sub></b> (0.005 M) with LDA (0.10 M) in the presence of 1 mol % LiCl in THF (12.2 M) at $-78\text{ }^{\circ}\text{C}$ . | S16 |
| <b>Figure 13.</b> Ortholithiation of <b>1-<i>d</i><sub>3</sub></b> (0.032 M) with LDA (0.10 M) in 12.2 M <i>d</i> <sub>8</sub> -THF monitored by $^1\text{H}$ NMR.                                                   | S17 |
| <b>Figure 14.</b> Plot of initial rate vs [ArH] for the ortholithiation of <b>1</b> with LDA (0.050 M) in THF (12.2 M) at $-78\text{ }^{\circ}\text{C}$ .                                                            | S18 |
| <b>Figure 15.</b> Plot of initial rate vs [ArH] for the ortholithiation of <b>1</b> with LDA (0.20 M) in THF (3.05 M) at $-78\text{ }^{\circ}\text{C}$ .                                                             | S19 |
| <b>Figure 16.</b> Plot of initial rate versus [LDA] in THF (3.05 M) for the ortholithiation of <b>1</b> (0.005 M) at $-78\text{ }^{\circ}\text{C}$ .                                                                 | S20 |
| <b>Figure 17.</b> Plot of initial rate versus [LDA] in THF (6.10 M) for the ortholithiation of <b>1</b> (0.005 M) at $-78\text{ }^{\circ}\text{C}$ .                                                                 | S21 |
| <b>Figure 18.</b> Plot of initial rate versus [LDA] in THF (9.15 M) for the ortholithiation of <b>1</b> (0.005 M) at $-78\text{ }^{\circ}\text{C}$ .                                                                 | S22 |
| <b>Figure 19.</b> Plot of initial rate versus [LDA] in THF (12.2 M) for the ortholithiation of <b>1</b> (0.005 M) at $-78\text{ }^{\circ}\text{C}$ .                                                                 | S23 |
| <b>Figure 20.</b> Plot of initial rate versus [THF] in hexanes for the ortholithiation of <b>1</b> (0.005 M) by LDA (0.050 M) at $-78\text{ }^{\circ}\text{C}$ .                                                     | S24 |
| <b>Figure 21.</b> Plot of initial rate versus [THF] in hexanes for the ortholithiation of <b>1</b> (0.005 M) by LDA (0.10 M) at $-78\text{ }^{\circ}\text{C}$ .                                                      | S25 |
| <b>Figure 22.</b> Plot of initial rate versus [THF] in hexanes for the ortholithiation of <b>1</b> (0.005 M) by LDA (0.15 M) at $-78\text{ }^{\circ}\text{C}$ .                                                      | S26 |

|                                                                                                                                                                                                                                    |     |
|------------------------------------------------------------------------------------------------------------------------------------------------------------------------------------------------------------------------------------|-----|
| <b>Figure 23.</b> Plot of initial rate versus [THF] in hexanes for the ortholithiation of <b>1</b> (0.005 M) by LDA (0.20 M) at $-78\text{ }^{\circ}\text{C}$ .                                                                    | S27 |
| <b>Figure 24.</b> Plot of initial rate versus [LDA] in THF (12.2 M) for the ortholithiation of <b>1</b> (0.060 M) at $-78\text{ }^{\circ}\text{C}$ .                                                                               | S28 |
| <b>Figure 25.</b> Plot of initial rate versus [THF] in hexanes for the ortholithiation of <b>1</b> (0.005 M) by LDA (0.20 M) at $-78\text{ }^{\circ}\text{C}$ .                                                                    | S29 |
| <b>Figure 26.</b> Plot of initial rate versus [LiCl] for the ortholithiation of <b>1</b> (0.05 M) by 0.10 M LDA in 12.2 M THF at $-78\text{ }^{\circ}\text{C}$ .                                                                   | S30 |
| <b>Figure 27.</b> Plot of initial rate vs [ArH] for the ortholithiation of <b>1</b> with LDA (0.10 M) in THF (12.2 M) with 1.0 mol% LiCl at $-78\text{ }^{\circ}\text{C}$ .                                                        | S31 |
| <b>Figure 28.</b> Plot of initial rate versus [LDA] in THF (12.2 M) for the ortholithiation of <b>1</b> (0.050 M) in the presence of 1.0 mol% LiCl at $-78\text{ }^{\circ}\text{C}$ .                                              | S32 |
| <b>Figure 29.</b> Plot of initial rate versus [THF] in Et <sub>2</sub> O and in hexanes cosolvent for the ortholithiation of <b>1</b> (0.05 M) by LDA (0.10 M) in the presence of 1.0 mol% LiCl at $-78\text{ }^{\circ}\text{C}$ . | S33 |
| <b>Figure 30.</b> Plot of initial rate vs [ArD <sub>4</sub> ] for the ortholithiation of <b>1-d<sub>4</sub></b> with LDA (0.10 M) in THF (12.2 M) at $-42\text{ }^{\circ}\text{C}$ .                                               | S34 |
| <b>Figure 31.</b> Plot of initial rate versus [LDA] in THF (12.2 M) for the ortholithiation of <b>1-d<sub>4</sub></b> (0.005 M) at $-42\text{ }^{\circ}\text{C}$ .                                                                 | S35 |
| <b>Figure 32.</b> Plot of initial rate versus [THF] in Et <sub>2</sub> O cosolvent for the ortholithiation of <b>1-d<sub>4</sub></b> (0.005 M) by LDA (0.10 M) at $-42\text{ }^{\circ}\text{C}$ .                                  | S36 |
| <b>Figure 33.</b> Plot of initial rate versus [LiCl] for the ortholithiation of <b>1-d<sub>4</sub></b> (0.005 M) by 0.30 M LDA in 12.2 M THF at $-42\text{ }^{\circ}\text{C}$ .                                                    | S37 |
| <b>Figure 34.</b> Plot of initial rate versus [ArD <sub>4</sub> ] for the ortholithiation of <b>1-d<sub>4</sub></b> (0.005 M) by LDA (0.10 M) in the presence of 3.0 mol% LiCl at $-42\text{ }^{\circ}\text{C}$ .                  | S38 |
| <b>Figure 35.</b> Plot of initial rate versus [LDA] in THF (12.2 M) for the ortholithiation of <b>1-d<sub>4</sub></b> (0.005 M) in the presence of 3.0 mol% LiCl at $-42\text{ }^{\circ}\text{C}$ .                                | S39 |
| <b>Figure 36.</b> Plot of initial rate versus [THF] in Et <sub>2</sub> O cosolvent for the ortholithiation of <b>1-d<sub>4</sub></b> (0.005 M) by LDA (0.10 M) in the presence of 3.0 mol% LiCl at $-42\text{ }^{\circ}\text{C}$ . | S40 |
| <b>Figure 37.</b> Plot of initial rate vs [ArD <sub>4</sub> ] for the ortholithiation of <b>1-d<sub>4</sub></b> with LDA (0.10 M) in THF (12.2 M) with at $-78\text{ }^{\circ}\text{C}$ .                                          | S41 |

|                                                                                                                                                                                                  |     |
|--------------------------------------------------------------------------------------------------------------------------------------------------------------------------------------------------|-----|
| <b>Figure 38.</b> Plot of initial rate versus [LDA] in THF (12.2 M) for the ortholithiation of <b>1-d<sub>4</sub></b> (0.005 M) at -78 °C.                                                       | S42 |
| <b>Figure 39.</b> Plot of initial rate versus [LDA] in THF (3.05 M) for the ortholithiation of <b>1-d<sub>4</sub></b> (0.005 M) at -78 °C.                                                       | S43 |
| <b>Figure 40.</b> Plot of initial rate versus [THF] in hexanes for the ortholithiation of <b>1-d<sub>4</sub></b> (0.005 M) by LDA (0.10 M) at -78 °C.                                            | S44 |
| <b>Figure 41.</b> Plot of initial rate versus [THF] in hexanes for the ortholithiation of <b>1-d<sub>4</sub></b> (0.005 M) by LDA (0.050 M) at -78 °C.                                           | S45 |
| <b>Figure 42.</b> Plot of initial rate versus [THF] in hexanes for the ortholithiation of <b>1-d<sub>4</sub></b> (0.005 M) by LDA (0.20 M) at -78 °C.                                            | S46 |
| <b>Figure 43.</b> Plot of initial rate versus [LiCl] for the ortholithiation of <b>1-d<sub>4</sub></b> (0.005 M) by 0.10 M LDA in 12.2 M THF at -78 °C.                                          | S47 |
| <b>Figure 44.</b> Plot of initial rate versus [ArD <sub>4</sub> ] for the ortholithiation of <b>1-d<sub>4</sub></b> (0.005 M) by LDA (0.10 M) in the presence of 2.0 mol% LiCl at -78 °C.        | S48 |
| <b>Figure 45.</b> Plot of initial rate versus [LDA] in THF (12.2 M) for the ortholithiation of <b>1-d<sub>4</sub></b> (0.005 M) in the presence of 2.0 mol% LiCl at -78 °C.                      | S49 |
| <b>Figure 46.</b> Plot of initial rate versus [THF] in Et <sub>2</sub> O for the ortholithiation of <b>1-d<sub>4</sub></b> (0.005 M) by LDA (0.10 M) in the presence of 2.0 mol% LiCl at -78 °C. | S50 |
| <b>Figure 47.</b> Plot of initial rate versus [LiCl] for the ortholithiation of <b>1-d<sub>4</sub></b> (0.005 M) by 0.10 M LDA in 12.2 M THF at -90 °C.                                          | S51 |
| <b>Figure 48.</b> Plot of ln(k/T) versus (1/T) for the ortholithiation of <b>1-d<sub>4</sub></b> (0.005 M) by LDA (0.10 M) in THF (12.2 M) at various temperatures.                              | S52 |
| <b>Scheme 1.</b> Scheme of dimer- and monomer-based lithiations                                                                                                                                  | S53 |
| <b>Figure 49.</b> Simulation for the plots of initial rate vs [LDA] and monomer [A] vs catalyst concentration showing catalytic inhibition.                                                      | S54 |
| <b>Figure 50.</b> Simulation for the plots of initial rate vs [LDA] and monomer [A] vs catalyst concentration showing no changes in rate.                                                        | S54 |
| <b>Figure 51.</b> Simulation for the plots of initial rate vs [LDA] and monomer [A] vs catalyst concentration showing catalytic acceleration.                                                    | S55 |

|                                                                                                                                                                                                                                                                                        |     |
|----------------------------------------------------------------------------------------------------------------------------------------------------------------------------------------------------------------------------------------------------------------------------------------|-----|
| <b>Part 4: Derivations</b>                                                                                                                                                                                                                                                             | S56 |
| <hr/>                                                                                                                                                                                                                                                                                  |     |
| <b>Derivation 1.</b> Derivation of steady-state rate expressions                                                                                                                                                                                                                       | S56 |
| <b>Part 5: Computational Studies</b>                                                                                                                                                                                                                                                   | S59 |
| <hr/>                                                                                                                                                                                                                                                                                  |     |
| <b>Table 1.</b> Optimized geometries at B3LYP level of theory with 6-31G(d) basis set for the reactants at $-78\text{ }^{\circ}\text{C}$ with free energies (Hartrees) and cartesian coordinates (X, Y, Z).                                                                            | S60 |
| <b>Table 2.</b> Optimized geometries at B3LYP level of theory with 6-31G(d) basis set for the serial solvation of <b>C</b> and <b>D</b> at $-78\text{ }^{\circ}\text{C}$ with free energies (Hartrees) and cartesian coordinates (X, Y, Z).                                            | S63 |
| <b>Table 3.</b> Optimized geometries of trisolvated LDA open dimer transition state structures at B3LYP level of theory with 6-31G(d) basis set for the ortholithiation of <b>1</b> at $-78\text{ }^{\circ}\text{C}$ with free energies (Hartrees), and cartesian coordinates (X,Y,Z). | S65 |
| <b>Table 4.</b> Optimized geometries of monomer-based transition state structures at B3LYP level of theory with 6-31G(d) basis set for the ortholithiation of <b>1</b> at $-78\text{ }^{\circ}\text{C}$ with free energies (Hartrees), and cartesian coordinates (X,Y,Z).              | S67 |
| <b>Table 5.</b> Optimized geometries of dimer-based transition state structures at B3LYP level of theory with 6-31G(d) basis set for the ortholithiation of <b>1</b> at $-78\text{ }^{\circ}\text{C}$ with free energies (Hartrees), and cartesian coordinates (X,Y,Z).                | S70 |
| <b>References</b>                                                                                                                                                                                                                                                                      | S75 |

Chart 1

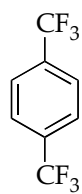

1

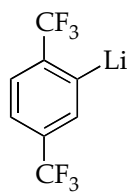

2

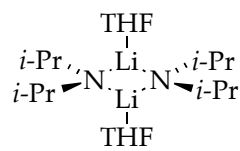

3

## Part 1: Experimental Procedures:

**2,3,5,6-Deutero-1,4-Bis(trifluoromethyl)benzene (1-*d*<sub>4</sub>)** A 10.6 M solution of *n*-BuLi in hexane (4.70 mL, 50.0 mmol) was added via syringe pump to a solution of 1,4-bis(trifluoromethyl)benzene (7.0 mL, 45.2 mmol) in 150 mL of dry THF at -78 °C under Argon over a period of 20 min. The solution was stirred for an additional 25 min. MeOD (2.03 mL, 50.0 mmol) was added via syringe pump over a period of 20 min. The mixture was allowed to stir for 1 hr. The process of sequential addition of 1.1 equiv *n*-BuLi and 1.1 equiv *d*-MeOH was repeated 5 more times. A final aliquot of MeOD (10 mL, 5.0 equiv) was added to fully quench the reaction. After the mixture was allowed to warm to room temperature, the pH was adjusted to 1.0 with 4.0 M aq HCl to dissolve all lithium salts. Organic and aqueous layers were separated, and the organic layer was extracted with more cold 0.2 M HCl to remove excess THF. Extraction was stopped when the total organic volume was approximately 10-15 mL. The organic layer was dried over Na<sub>2</sub>SO<sub>4</sub> and distilled. The product was collected by distillation at 116 °C as a colorless liquid (2.26 g, 10.4 mmol) in 23% yield. <sup>13</sup>C NMR δ 134.20 (q, <sup>2</sup>J<sub>C-F</sub> = 33.2 Hz), 125.75 (tq, <sup>1</sup>J<sub>C-D</sub> = 25.5 Hz, <sup>3</sup>J<sub>C-F</sub> = 3.3 Hz), 123.80 (q, <sup>1</sup>J<sub>C-F</sub> = 272.1 Hz); LRMS: 218.2 *m/z*.

## Part 2: NMR Spectroscopic Studies

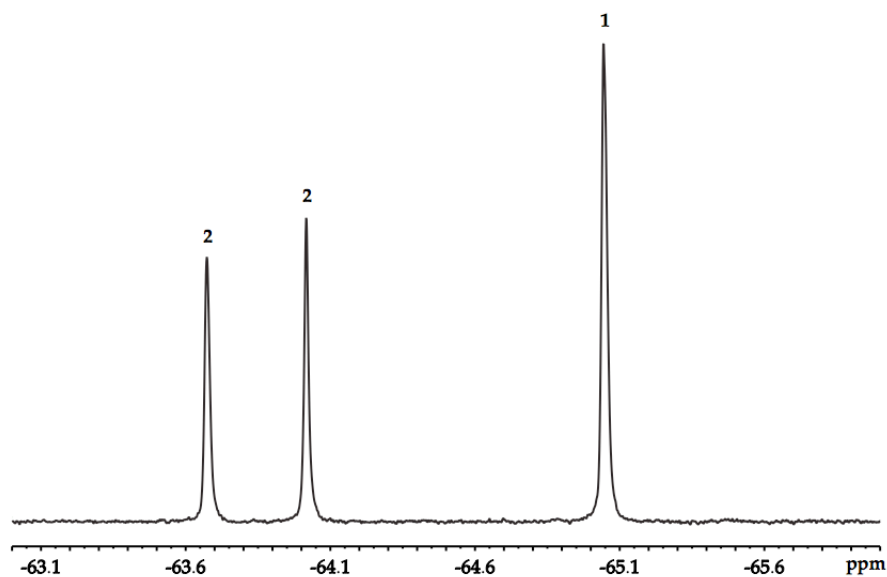

**Figure 1.**  $^{19}\text{F}$  NMR spectrum of LDA (0.10 M) with **1** (0.005 M) in 12.2 M THF after aging for 10 min at  $-78\text{ }^\circ\text{C}$ :  $\delta$  -65.05 (s), -64.02 (s), -63.67 (s).

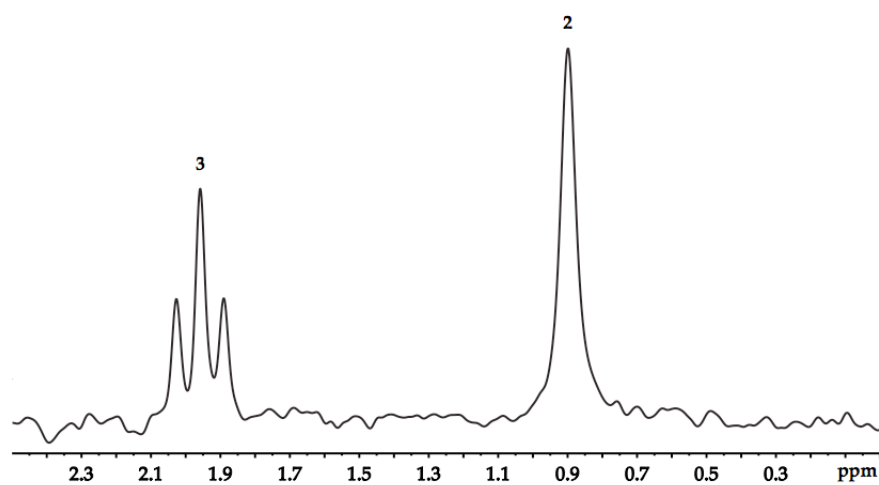

**Figure 2.**  $^6\text{Li}$  NMR Spectrum of  $[^6\text{Li}, ^{15}\text{N}]$ LDA (0.10 M) and **1** (0.05 M) in 12.2 M THF recorded at  $-78\text{ }^\circ\text{C}$ :  $\delta$  1.96 (t,  $^1J_{\text{Li-N}} = 5.0\text{ Hz}$ ), 0.90 (s).



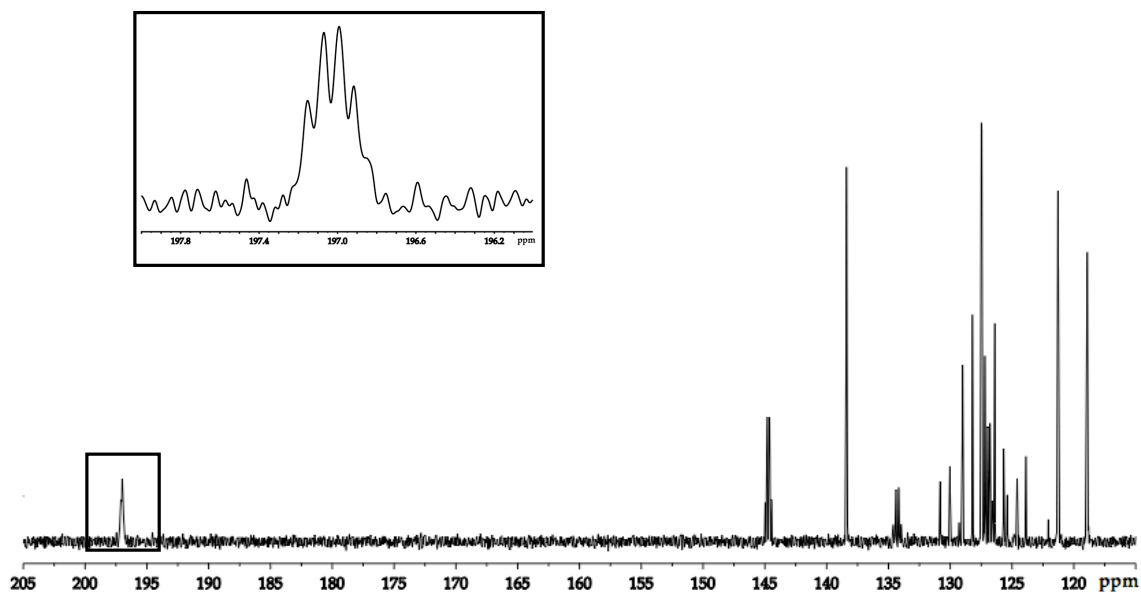

**Figure 3.**  $^{13}\text{C}\{^1\text{H}\}$  NMR spectrum of **2** generated from **1** (0.15 M) with  $[\text{}^6\text{Li}]\text{LDA}$  (0.30 M, 2.0 equiv) in 12.2 M  $\text{THF-}d_8$  at  $-100\text{ }^\circ\text{C}$ . Resonances of **1** remain at equilibrium. **2**:  $\delta$  197.02 (m), 144.72 (q,  $^2J_{\text{C-F}} = 25.2\text{ Hz}$ ), 138.40 (s), 128.11 (q,  $^1J_{\text{C-F}} = 273.3\text{ Hz}$ ), 127.31 (q,  $^1J_{\text{C-F}} = 273.0\text{ Hz}$ ), 126.88 (q,  $^2J_{\text{C-F}} = 28.5\text{ Hz}$ ), 121.29 (s), 118.93 (s). **1**:  $\delta$  134.28 (q,  $^2J_{\text{C-F}} = 32.8\text{ Hz}$ ), 127.48 (s), 124.79 (q,  $^1J_{\text{C-F}} = 272.3\text{ Hz}$ ).

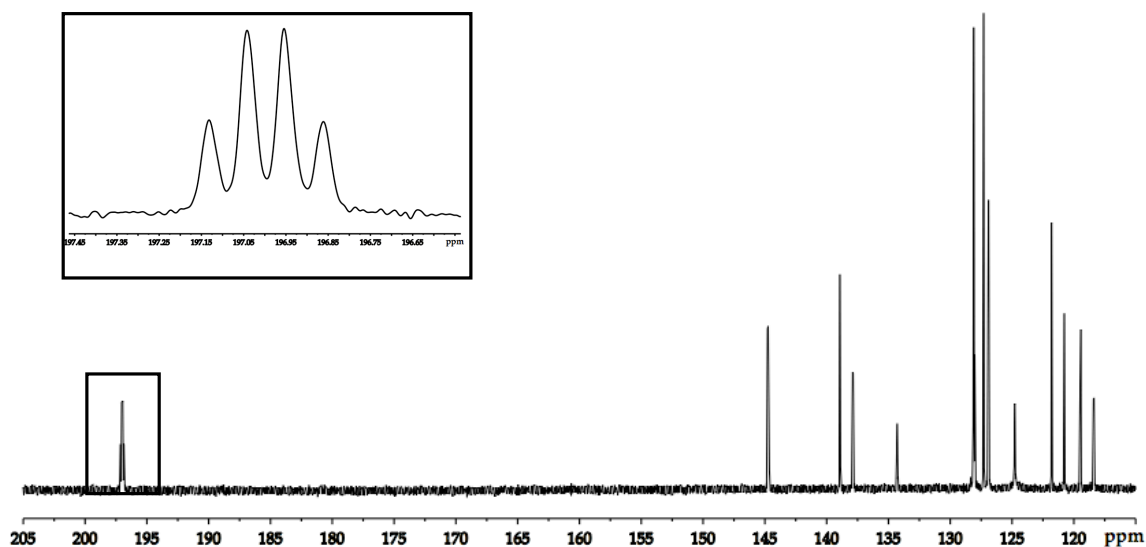

**Figure 4.**  $^{13}\text{C}\{^{19}\text{F}\}$  NMR spectrum of **2** generated from **1** (0.15 M) with  $[\text{}^6\text{Li}]\text{LDA}$  (0.30 M, 2.0 equiv) in 12.2 M  $\text{THF-}d_8$  at  $-100\text{ }^\circ\text{C}$ . Resonances of **1** remain at equilibrium. **2**:  $\delta$  197.00 (td,  $^1J_{\text{C-Li}} = 13.2\text{ Hz}$ ,  $^2J_{\text{C-H}} = 6.6\text{ Hz}$ ), 144.72 (dd,  $^2J_{\text{C-H}} = 12.6\text{ Hz}$ ,  $^3J_{\text{C-H}} = 7.2\text{ Hz}$ ), 138.40 (dd,  $^1J_{\text{C-H}} = 156.5\text{ Hz}$ ,  $^2J_{\text{C-H}} = 5.3\text{ Hz}$ ), 128.11 (m), 127.31 (t,  $^2J_{\text{C-H}} = 3.8\text{ Hz}$ ), 126.88 (m), 121.29 (d,  $^1J_{\text{C-H}} = 155.3\text{ Hz}$ ), 118.93 (dd,  $^1J_{\text{C-H}} = 160.2\text{ Hz}$ ,  $^2J_{\text{C-H}} = 5.8\text{ Hz}$ ). **1**:  $\delta$  134.29 (m), 127.47 (dm,  $^1J_{\text{C-H}} = 168.0\text{ Hz}$ ), 124.79 (m).

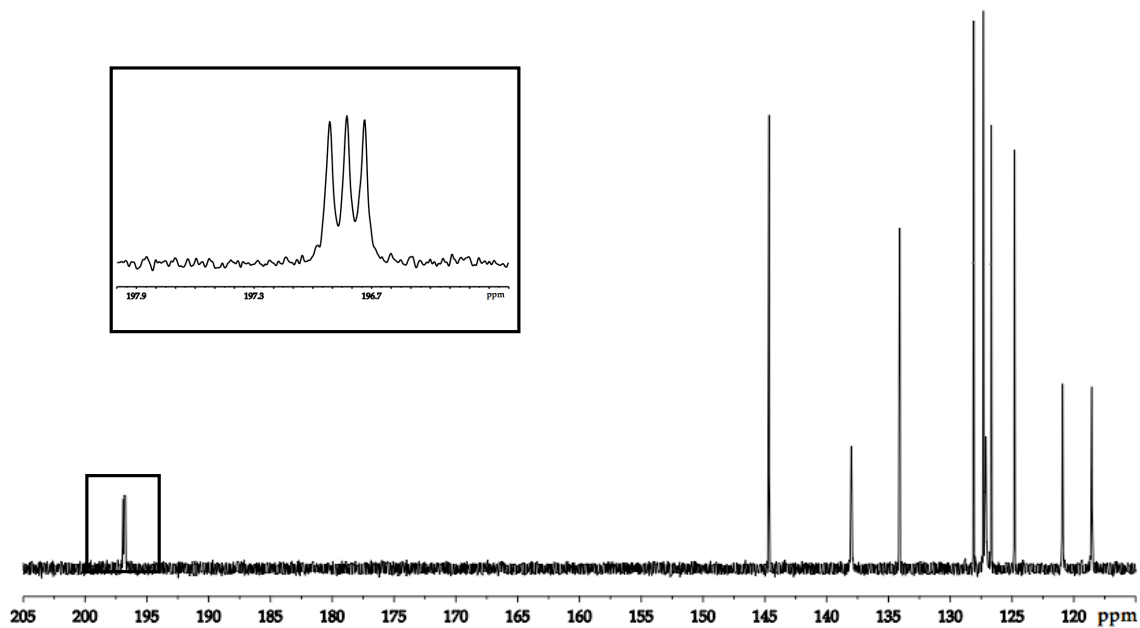

**Figure 5.**  $^{13}\text{C}\{^{19}\text{F}\}$  NMR spectrum of  $2-d_3$  generated from  $1-d_4$  (0.15 M) with  $[\text{}^6\text{Li}]\text{LDA}$  (0.30 M) in 12.2 M  $\text{THF-}d_8$  at  $-100\text{ }^\circ\text{C}$ . Resonances of  $1-d_4$  remain at equilibrium.  $2-d_3$ :  $\delta$  196.83 (t,  $^1J_{\text{C-Li}} = 13.2\text{ Hz}$ ) 144.66 (s), 138.00 (s), 128.11 (s), 127.12 (s), 126.68 (s), 120.92 (s), 118.55 (s).  $1-d_4$ :  $\delta$  134.10 (s), 127.33 (s), 124.80 (s).

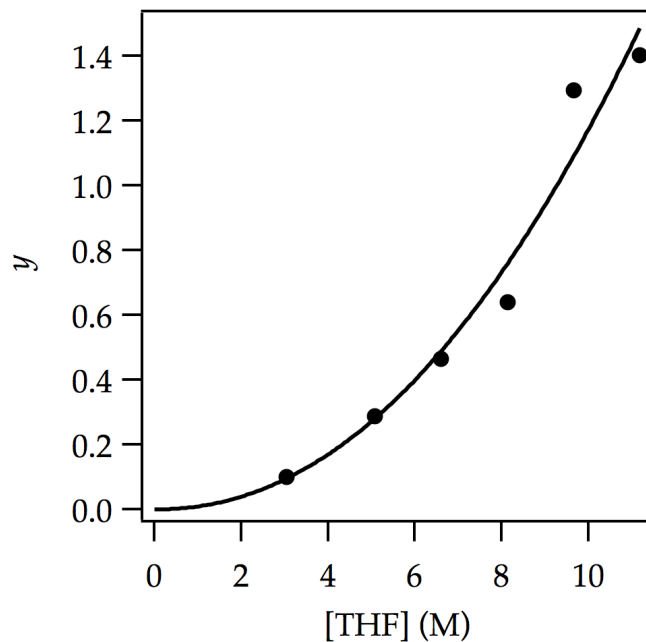

**Figure 6.** Plot of  $\{[i\text{-Pr}_2\text{NH}][\text{ArLi}]\} / \{[\text{LDA}]^{(1/2)}[\text{ArH}]\}$  vs [THF] for the ortholithiation of **1** (0.005 M) with LDA (0.10 M) and diisopropylamine (0.025 M) at  $-78\text{ }^\circ\text{C}$  measured by  $^{19}\text{F}$  NMR spectroscopy. The curve depicts an unweighted least-squares fit to  $y = K_{eq}[\text{THF}]^n$ . [ $K_{eq} = (9 \pm 7) \times 10^{-3}$ ,  $n = (2.1 \pm 0.3)$ ]

| [THF] (M) | $y$  |
|-----------|------|
| 11.18     | 1.40 |
| 9.66      | 1.29 |
| 8.13      | 0.64 |
| 6.61      | 0.46 |
| 5.08      | 0.29 |
| 3.05      | 0.10 |

### Part 3: Rate Studies

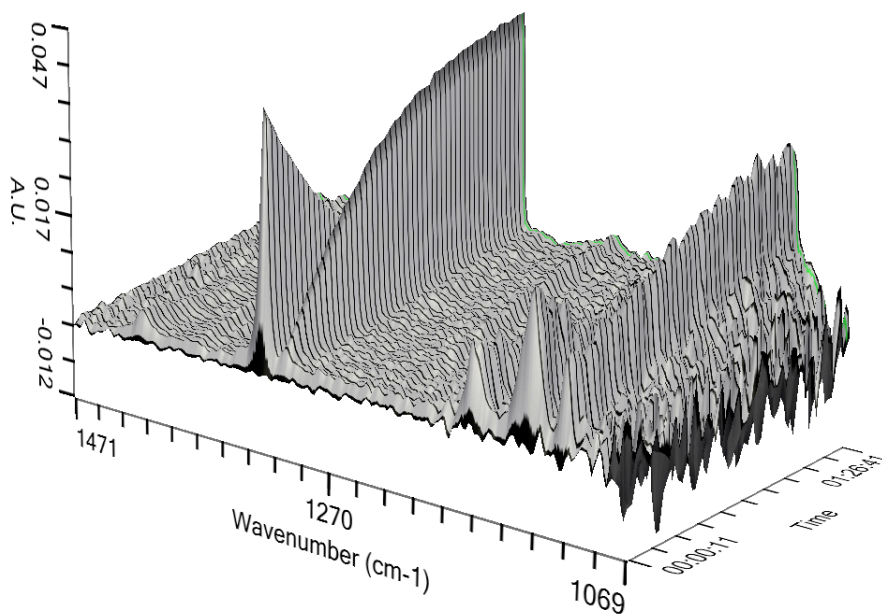

**Figure 7.** Representative in situ IR traces for the ortholithiation of **1** (0.005 M) by LDA (0.10 M) in THF at  $-78\text{ }^{\circ}\text{C}$ . IR absorptions for compounds **1** and **2** and their associated isotopomers are listed below. The IR spectra were deconvoluted using ConcIRT<sup>®</sup>.

**1:**  $1421\text{ cm}^{-1}$ ,  $1323\text{ cm}^{-1}$ ,  $1173\text{ cm}^{-1}$ ,  $1138\text{ cm}^{-1}$ ,  $1115\text{ cm}^{-1}$   
**2:**  $1378\text{ cm}^{-1}$ ,  $1307\text{ cm}^{-1}$ ,  $1160\text{ cm}^{-1}$ ,  $1111\text{ cm}^{-1}$

**1- $d_4$ :**  $1448\text{ cm}^{-1}$ ,  $1348\text{ cm}^{-1}$ ,  $1253\text{ cm}^{-1}$ ,  $1156\text{ cm}^{-1}$ ,  $1136\text{ cm}^{-1}$ ,  $1026\text{ cm}^{-1}$   
**2- $d_3$ :**  $1391\text{ cm}^{-1}$ ,  $1212\text{ cm}^{-1}$ ,  $1015\text{ cm}^{-1}$

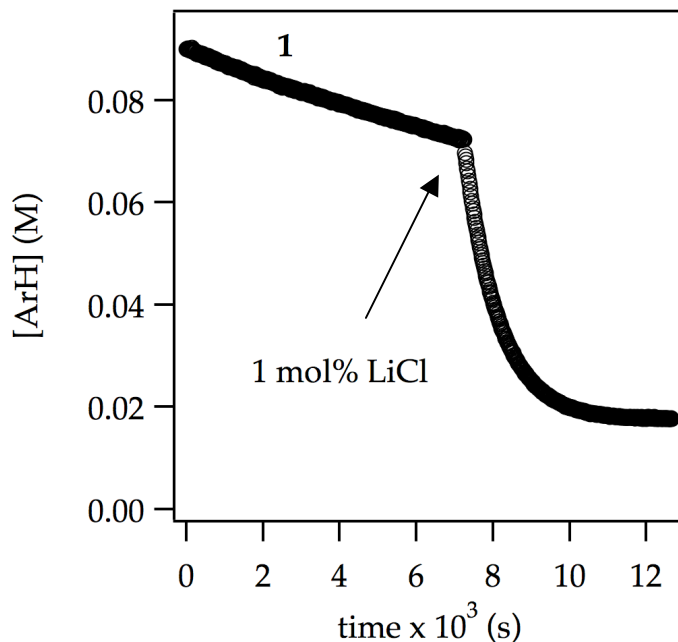

**Figure 8.** Ortholithiation of **1** (0.09 M) with LDA (0.10 M) in 12.2 M THF at  $-78\text{ }^{\circ}\text{C}$  monitored by IR spectroscopy ( $1323\text{ cm}^{-1}$ ) with injection of 1.0 mol % LiCl.

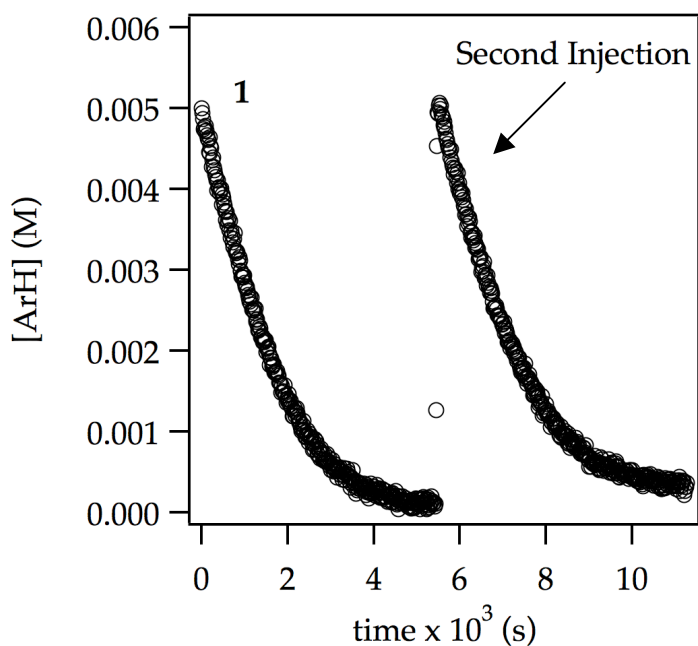

**Figure 9.** Representative plot showing concentration of arene **1** vs time for the ortholithiation of **1** (0.005 M) with LDA (0.10 M) in 12.2 M THF at  $-78\text{ }^{\circ}\text{C}$ . After the completion of the reaction, a second aliquot of **1** (0.005 M) was injected, showing no evidence of autocatalysis (catalysis by ArLi).

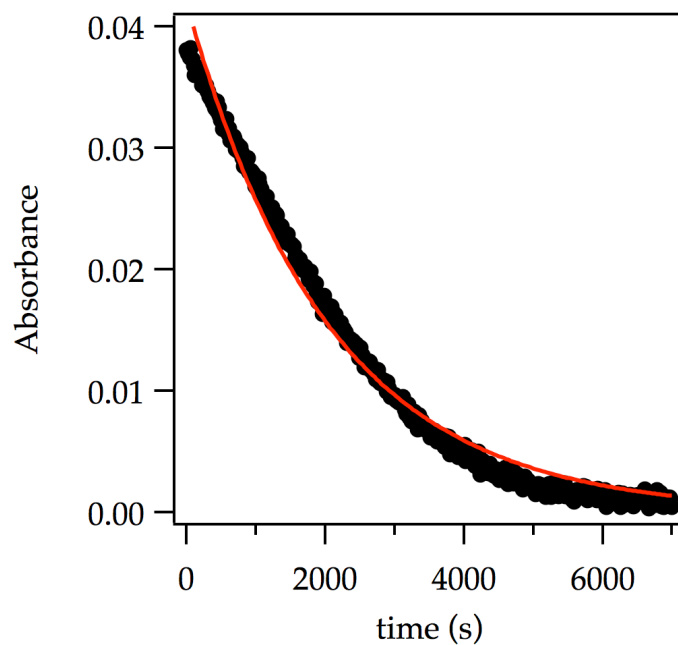

**Figure 10.** Representative plot showing poor exponential fit (red curve) to the decay of ortholithiation of **1** (0.005 M) with LDA (0.10 M) in THF (12.2 M) at  $-78$  °C monitored by IR spectroscopy.

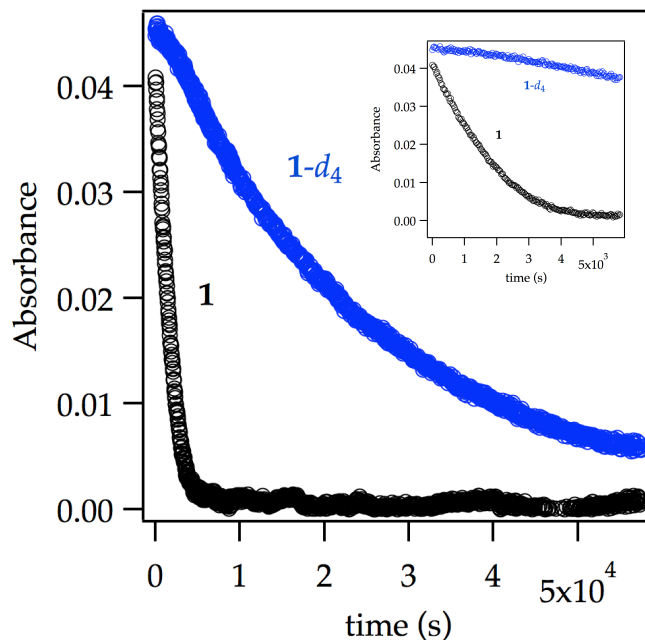

**Figure 11.** Competitive ortholithiation of **1** (0.005 M) and **1-d<sub>4</sub>** (0.005 M) with LDA (0.10 M) in THF (12.2 M) at -78 °C. Monitoring absorbances of **1** and **1-d<sub>4</sub>** at 1322 cm<sup>-1</sup> and 1253 cm<sup>-1</sup>, respectively, by IR Spectroscopy affords  $k_{\text{H}}/k_{\text{D}} = 21$ .

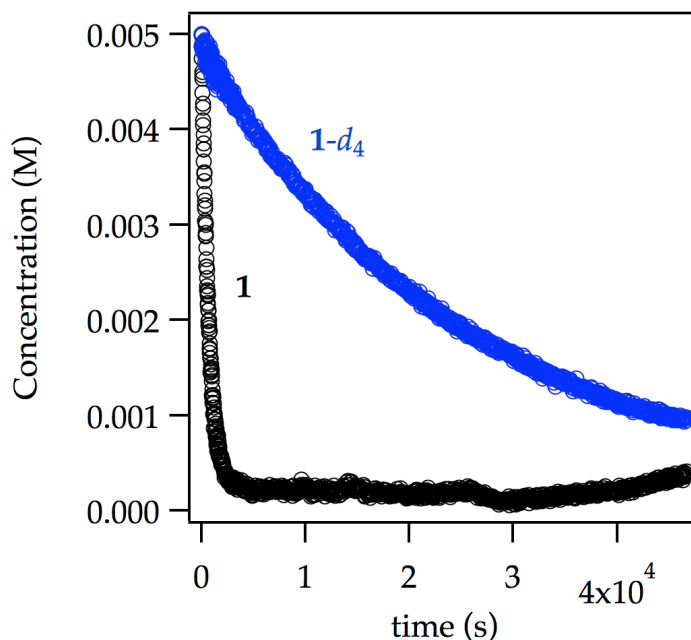

**Figure 12.** Competitive ortholithiation of **1** (0.005 M) and **1-d<sub>4</sub>** (0.005 M) with LDA (0.10 M) in the presence of 1 mol % LiCl in THF (12.2 M) at -78 °C. Monitoring absorbances of **1** and **1-d<sub>4</sub>** at 1322 cm<sup>-1</sup> and 1253 cm<sup>-1</sup>, respectively, by IR Spectroscopy affords  $k_{\text{H}}/k_{\text{D}} = 36$ .



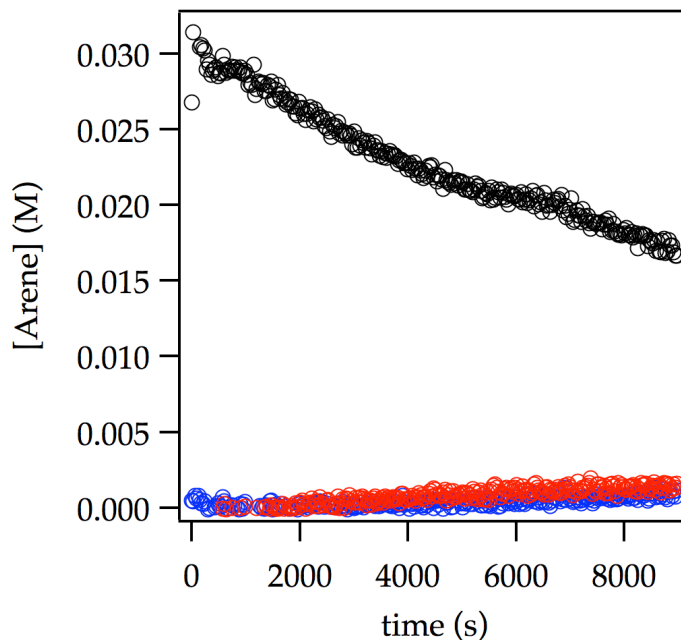

**Figure 13.** Ortholithiation of **1-*d*<sub>3</sub>** (0.032 M) with LDA (0.10 M) in 12.2 M *d*<sub>8</sub>-THF monitored by <sup>1</sup>H NMR. Percentages of regio-isomers were determined based on the initial rates of reactant decay (8.08 ppm) and products formation (7.11, 7.33, and 8.16 ppm). Theoretical percentages for the reversible and non-reversible mechanisms were derived from intramolecular (competitive) KIE.

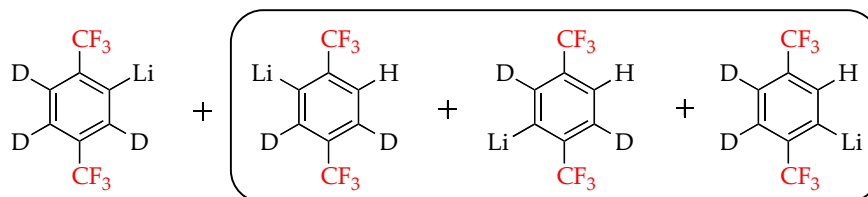

|                |        |         |      |      |
|----------------|--------|---------|------|------|
| Reversible     | 85%    | 5%      | 5%   | 5%   |
| Non-reversible | 47.5%  | 2.5%    | 25%  | 25%  |
| Result         | -----* | -----** | 5.3% | 6.5% |

\* Product not observed because no protons are present for detection

\*\* Product not observed due to chemical shift overlap with benzene (*d*<sub>8</sub>-THF impurity)

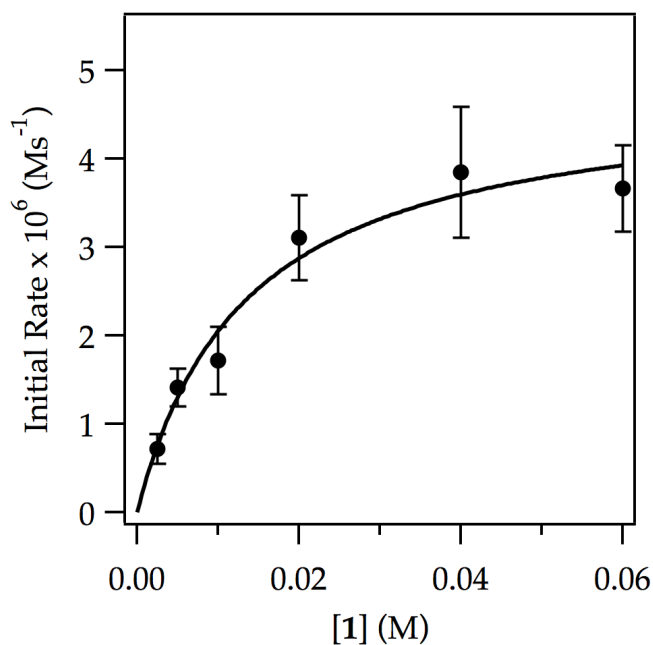

**Figure 14.** Plot of initial rate vs [ArH] (initial arene concentration) for the ortholithiation of **1** with LDA (0.050 M) in THF (12.2 M) at  $-78\text{ }^{\circ}\text{C}$  as measured by IR spectroscopy. The curve depicts an unweighted least-squares fit to a first-order saturation function:  $-\Delta[\text{ArH}]/\Delta t|_{t=0} = (a[\text{ArH}])/(1 + b[\text{ArH}])$ . [ $a = (3.6 \pm 0.7) \times 10^{-4}$ ,  $b = (74 \pm 20)$ ]

| [1] (M) | $y_1$ ( $\text{M}\cdot\text{s}^{-1}$ ) | $y_2$ ( $\text{M}\cdot\text{s}^{-1}$ ) |
|---------|----------------------------------------|----------------------------------------|
| 0.0025  | 8.37e-07                               | 5.95e-07                               |
| 0.005   | 1.56e-06                               | 1.26e-06                               |
| 0.01    | 1.45e-06                               | 1.99e-06                               |
| 0.02    | 2.77e-06                               | 3.45e-06                               |
| 0.04    | 3.32e-06                               | 4.37e-06                               |
| 0.06    | 4.01e-06                               | 3.32e-06                               |

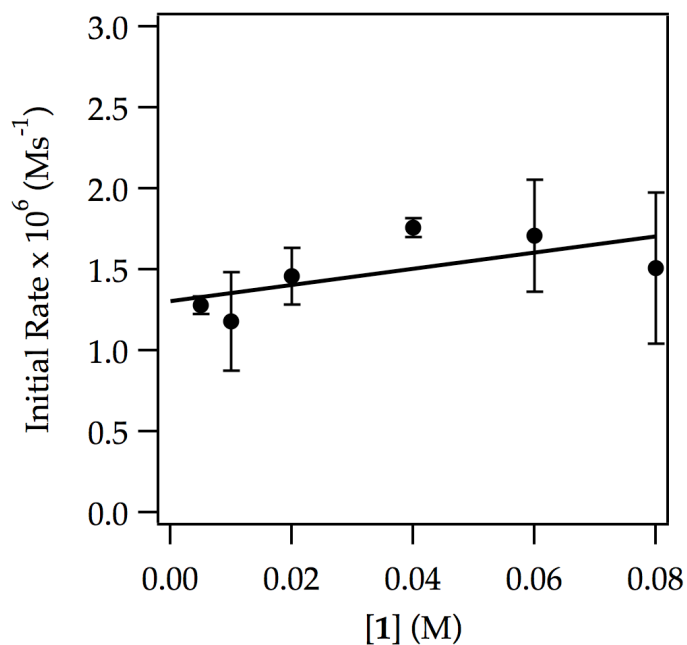

**Figure 15.** Plot of initial rate vs [ArH] (initial arene concentration) for the ortholithiation of **1** with LDA (0.20 M) in THF (3.05 M) at  $-78\text{ }^{\circ}\text{C}$  as measured by IR spectroscopy. The curve depicts an unweighted least-squares fit to  $y = a[\text{ArH}] + b$ . [ $a = (5 \pm 3) \times 10^{-6}$ ,  $b = (1.3 \pm 0.1) \times 10^{-6}$ ]

| [1] (M) | $y_1$ (Ms <sup>-1</sup> ) | $y_2$ (Ms <sup>-1</sup> ) | $y_3$ (Ms <sup>-1</sup> ) |
|---------|---------------------------|---------------------------|---------------------------|
| 0.005   | 1.30e-06                  | 1.33e-06                  | 1.22e-06                  |
| 0.01    | 1.40e-06                  | 9.67e-07                  | -----                     |
| 0.02    | 1.58e-06                  | 1.33e-06                  | -----                     |
| 0.04    | 1.80e-06                  | 1.72e-06                  | -----                     |
| 0.06    | 1.95e-06                  | 1.46e-06                  | -----                     |
| 0.08    | 1.18e-06                  | 1.84e-06                  | -----                     |

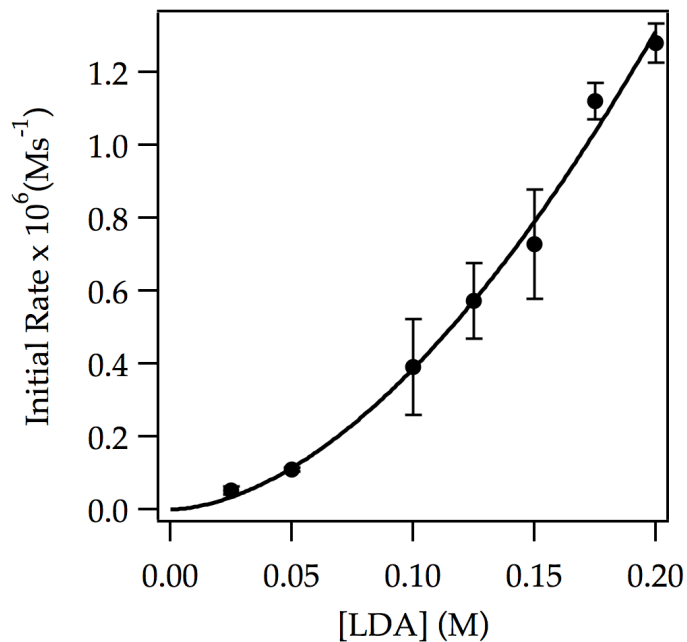

**Figure 16.** Plot of initial rate versus [LDA] in THF (3.05 M) for the ortholithiation of **1** (0.005 M) at  $-78\text{ }^{\circ}\text{C}$  measured by IR spectroscopy. The curve depicts an unweighted least-squares fit to  $y = a[\text{LDA}]^n$ . [ $a = (2.3 \pm 0.5) \times 10^{-5}$ ,  $n = (1.8 \pm 0.1)$ ]

| [LDA] (M) | $y_1$ (Ms <sup>-1</sup> ) | $y_2$ (Ms <sup>-1</sup> ) | $y_3$ (Ms <sup>-1</sup> ) |
|-----------|---------------------------|---------------------------|---------------------------|
| 0.025     | 5.99e-08                  | -----                     | 4.31e-08                  |
| 0.05      | 1.13e-07                  | -----                     | 1.06e-07                  |
| 0.10      | 3.04e-07                  | 5.43e-07                  | 3.27e-07                  |
| 0.125     | 4.99e-07                  | -----                     | 6.46e-07                  |
| 0.150     | 5.60e-07                  | 8.46e-07                  | 7.76e-07                  |
| 0.175     | 1.13e-06                  | 1.17e-06                  | 1.07e-06                  |
| 0.20      | 1.30e-06                  | 1.32e-06                  | 1.22e-06                  |

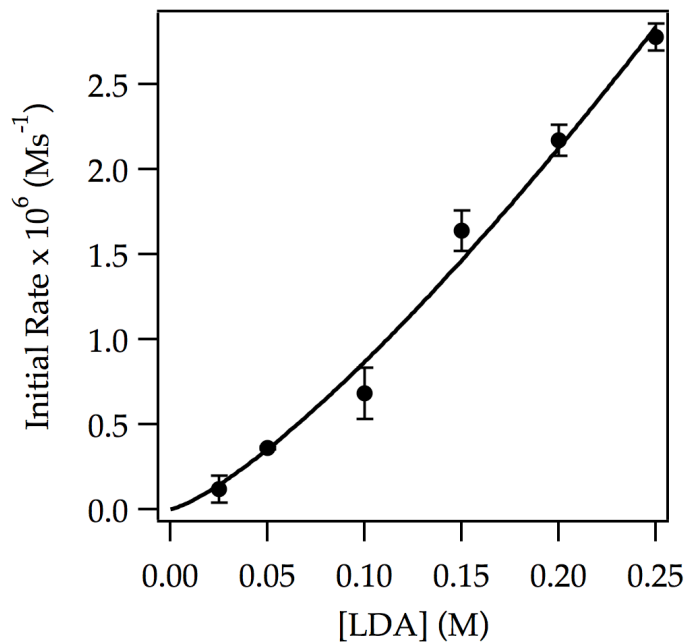

**Figure 17.** Plot of initial rate versus [LDA] in THF (6.10 M) for the ortholithiation of **1** (0.005 M) at  $-78\text{ }^{\circ}\text{C}$  measured by IR spectroscopy. The curve depicts an unweighted least-squares fit to  $y = a[\text{LDA}]^n$ . [ $a = (1.7 \pm 0.3) \times 10^{-5}$ ,  $n = (1.3 \pm 0.1)$ ]

| [LDA] (M) | $y_1$ ( $\text{M}\cdot\text{s}^{-1}$ ) | $y_2$ ( $\text{M}\cdot\text{s}^{-1}$ ) |
|-----------|----------------------------------------|----------------------------------------|
| 0.025     | 1.76e-07                               | 6.48e-08                               |
| 0.05      | 3.53e-07                               | 3.66e-07                               |
| 0.10      | 7.87e-07                               | 5.74e-07                               |
| 0.15      | 1.72e-06                               | 1.58e-06                               |
| 0.20      | 2.23e-06                               | 2.10e-06                               |
| 0.25      | 2.83e-06                               | 2.70e-06                               |

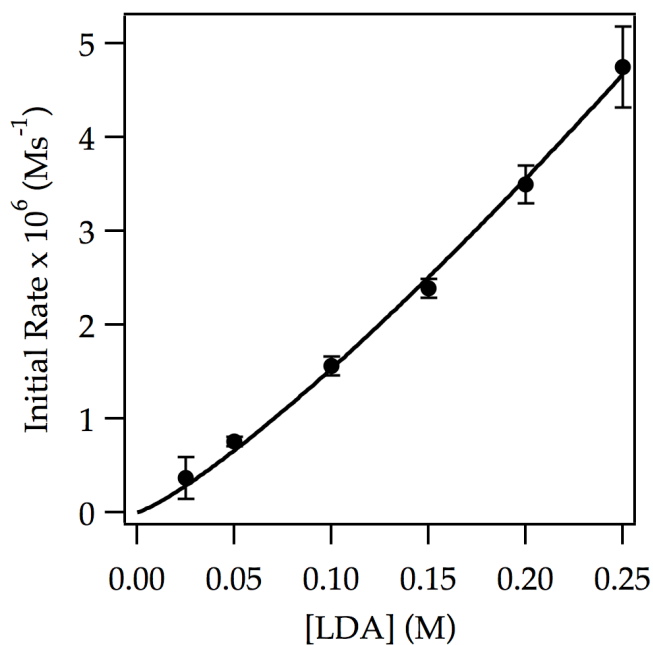

**Figure 18.** Plot of initial rate versus [LDA] in THF (9.15 M) for the ortholithiation of **1** (0.005 M) at  $-78\text{ }^{\circ}\text{C}$  measured by IR spectroscopy. The curve depicts an unweighted least-squares fit to  $y = a[\text{LDA}]^n$ . [ $a = (2.5 \pm 0.2) \times 10^{-5}$ ,  $n = (1.22 \pm 0.05)$ ]

| [LDA] (M) | $y_1$ (M·s <sup>-1</sup> ) | $y_2$ (M·s <sup>-1</sup> ) |
|-----------|----------------------------|----------------------------|
| 0.025     | 5.27e-07                   | 2.14e-07                   |
| 0.05      | 7.17e-07                   | 7.93e-07                   |
| 0.10      | 1.64e-06                   | 1.49e-06                   |
| 0.15      | 2.47e-06                   | 2.32e-06                   |
| 0.20      | 3.65e-06                   | 3.36e-06                   |
| 0.25      | 5.06e-06                   | 4.45e-06                   |

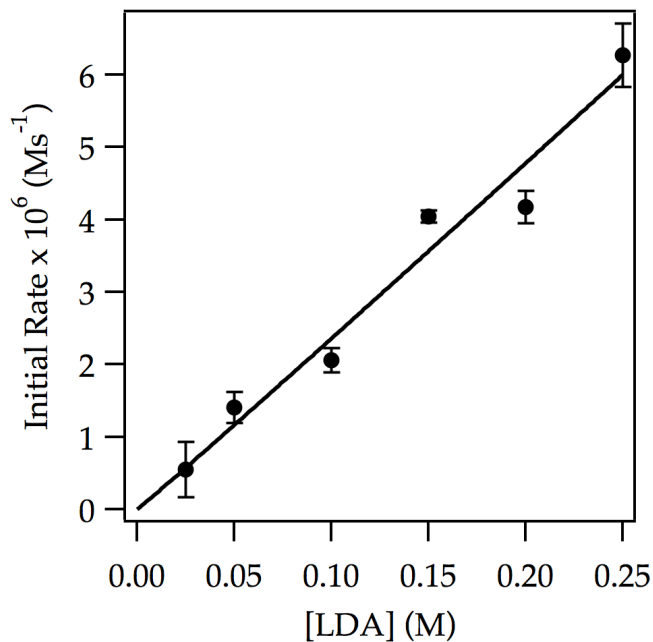

**Figure 19.** Plot of initial rate versus [LDA] in THF (12.2 M) for the ortholithiation of **1** (0.005 M) at  $-78\text{ }^{\circ}\text{C}$  measured by IR spectroscopy. The curve depicts an unweighted least-squares fit to  $y = a[\text{LDA}]^n$ . [ $a = (2.5 \pm 0.6) \times 10^{-5}$ ,  $n = (1.0 \pm 0.1)$ ]

| [LDA] (M) | $y_1$ (Ms <sup>-1</sup> ) | $y_2$ (Ms <sup>-1</sup> ) |
|-----------|---------------------------|---------------------------|
| 0.025     | 8.16e-07                  | 2.75e-07                  |
| 0.05      | 1.56e-06                  | 1.26e-06                  |
| 0.10      | 2.18e-06                  | 1.94e-06                  |
| 0.15      | 3.98e-06                  | 4.10e-06                  |
| 0.20      | 4.02e-06                  | 4.33e-06                  |
| 0.25      | 6.58e-06                  | 5.96e-06                  |

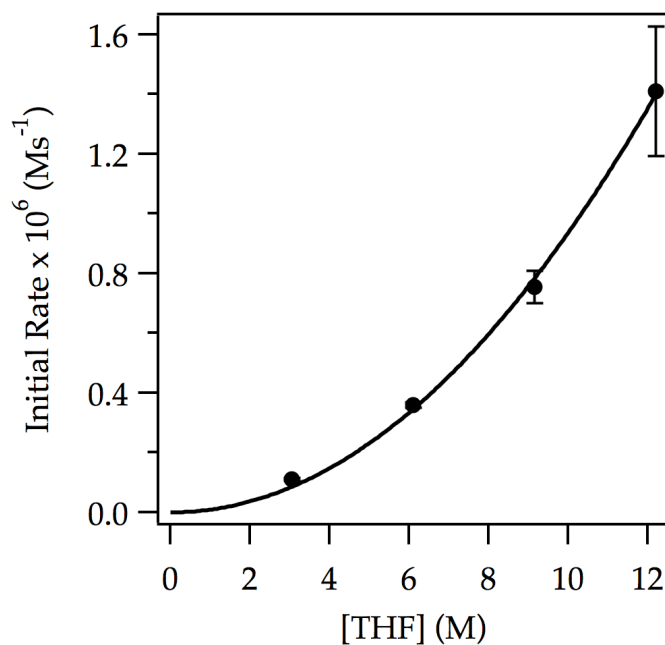

**Figure 20.** Plot of initial rate versus [THF] in hexanes for the ortholithiation of **1** (0.005 M) by LDA (0.050 M) at  $-78\text{ }^{\circ}\text{C}$  measured by IR spectroscopy. The curve depicts an unweighted least-squares fit to  $y = a[\text{THF}]^n$ . [ $a = (9 \pm 2) \times 10^{-9}$ ,  $n = (2.0 \pm 0.1)$ ]

| [THF] (M) | $y_1$ (Ms <sup>-1</sup> ) | $y_2$ (Ms <sup>-1</sup> ) |
|-----------|---------------------------|---------------------------|
| 12.2      | 1.56e-06                  | 1.26e-06                  |
| 9.15      | 7.17e-07                  | 7.93e-07                  |
| 6.10      | 3.53e-07                  | 3.66e-07                  |
| 3.05      | 1.13e-07                  | 1.06e-07                  |



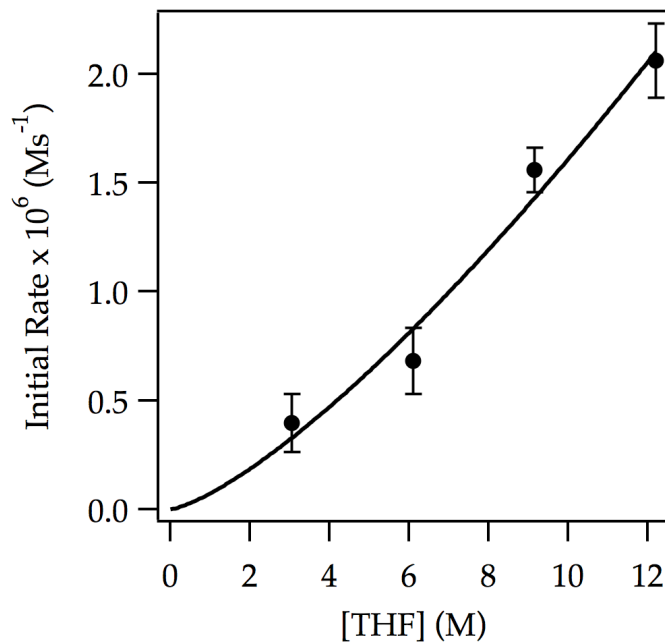

**Figure 21.** Plot of initial rate versus [THF] in hexanes for the ortholithiation of **1** (0.005 M) by LDA (0.10 M) at  $-78\text{ }^{\circ}\text{C}$  measured by IR spectroscopy. The curve depicts an unweighted least-squares fit to  $y = a[\text{THF}]^n$ . [ $a = (7 \pm 4) \times 10^{-8}$ ,  $n = (1.3 \pm 0.2)$ ]

| [THF] (M) | $y_1$ ( $\text{M}\cdot\text{s}^{-1}$ ) | $y_2$ ( $\text{M}\cdot\text{s}^{-1}$ ) | $y_3$ ( $\text{M}\cdot\text{s}^{-1}$ ) |
|-----------|----------------------------------------|----------------------------------------|----------------------------------------|
| 12.2      | 2.18e-06                               | 1.94e-06                               | -----                                  |
| 9.15      | 1.64e-06                               | 1.49e-06                               | -----                                  |
| 6.10      | 7.87e-07                               | 5.74e-07                               | -----                                  |
| 3.05      | 3.04e-07                               | 5.43e-07                               | 3.27e-07                               |

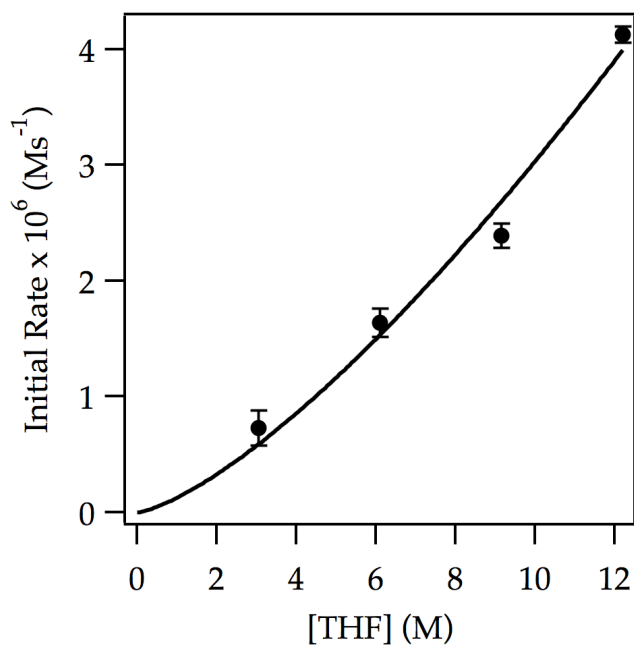

**Figure 22.** Plot of initial rate versus [THF] in hexanes for the ortholithiation of **1** (0.005 M) by LDA (0.15 M) at  $-78\text{ }^{\circ}\text{C}$  measured by IR spectroscopy. The curve depicts an unweighted least-squares fit to  $y = a[\text{THF}]^n$ . [ $a = (1.3 \pm 0.6) \times 10^{-7}$ ,  $n = (1.4 \pm 0.2)$ ]

| [THF] (M) | $y_1$ ( $\text{M}\cdot\text{s}^{-1}$ ) | $y_2$ ( $\text{M}\cdot\text{s}^{-1}$ ) | $y_3$ ( $\text{M}\cdot\text{s}^{-1}$ ) |
|-----------|----------------------------------------|----------------------------------------|----------------------------------------|
| 12.2      | 3.98e-06                               | 4.10e-06                               | -----                                  |
| 9.15      | 2.47e-06                               | 2.32e-06                               | -----                                  |
| 6.10      | 1.72e-06                               | 1.55e-06                               | -----                                  |
| 3.05      | 5.60e-07                               | 8.46e-07                               | 7.76e-07                               |

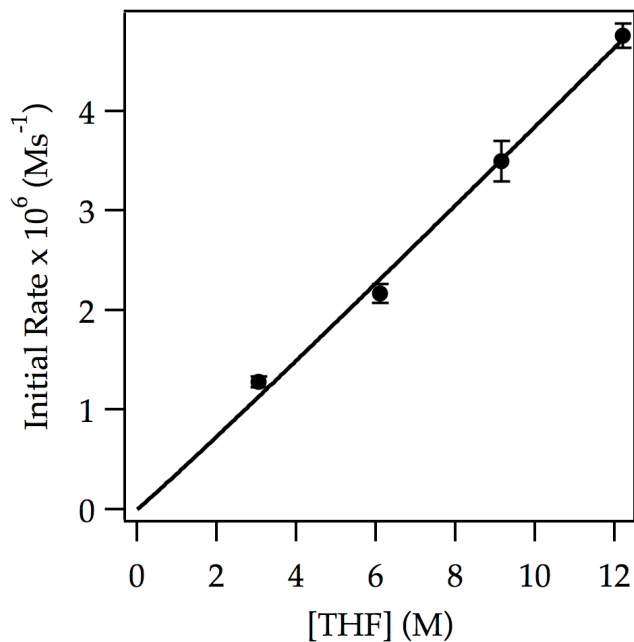

**Figure 23.** Plot of initial rate versus [THF] in hexanes for the ortholithiation of **1** (0.005 M) by LDA (0.20 M) at  $-78\text{ }^{\circ}\text{C}$  measured by IR spectroscopy. The curve depicts an unweighted least-squares fit to  $y = a[\text{THF}]^n$ . [ $a = (3.58 \pm 0.60) \times 10^{-7}$ ,  $n = (1.03 \pm 0.07)$ ]

| [THF] (M) | $y_1$ ( $\text{M}\cdot\text{s}^{-1}$ ) | $y_2$ ( $\text{M}\cdot\text{s}^{-1}$ ) | $y_3$ ( $\text{M}\cdot\text{s}^{-1}$ ) |
|-----------|----------------------------------------|----------------------------------------|----------------------------------------|
| 12.2      | 4.02e-06                               | 4.33e-06                               | -----                                  |
| 9.15      | 3.65e-06                               | 3.36e-06                               | -----                                  |
| 6.10      | 2.23e-06                               | 2.10e-06                               | -----                                  |
| 3.05      | 1.30e-06                               | 1.33e-06                               | 1.22e-06                               |

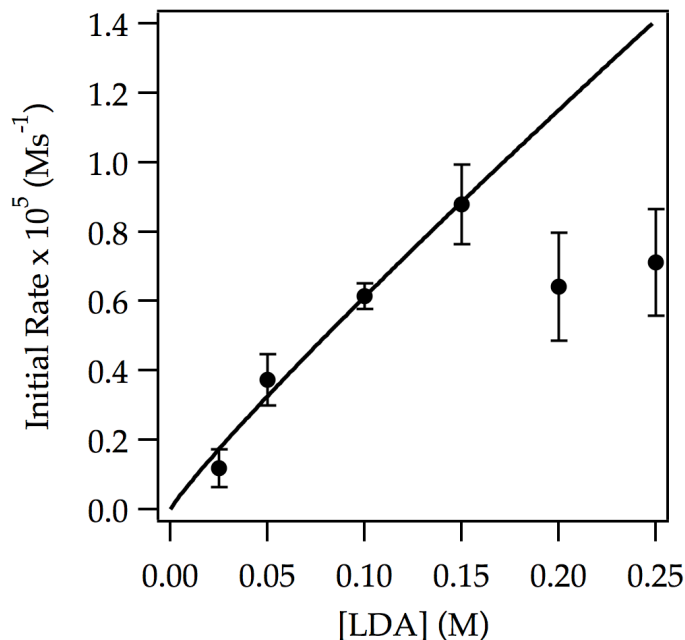

**Figure 24.** Plot of initial rate versus [LDA] in THF (12.2 M) for the ortholithiation of **1** (0.060 M) at  $-78\text{ }^{\circ}\text{C}$  measured by IR spectroscopy. The curve depicts an unweighted least-squares fit to  $y = a[\text{LDA}]^n$ . [ $a = (4 \pm 1) \times 10^{-5}$ ,  $n = (0.9 \pm 0.1)$ ]  
 \*The deviation at 0.20 and 0.25 was recurring and not understood. It has the appearance of a phase change (precipitation), but we don't visually see evidence for this hypothesis nor have we observed it previously.

| [LDA] (M) | $y_1$ ( $\text{M}\cdot\text{s}^{-1}$ ) | $y_2$ ( $\text{M}\cdot\text{s}^{-1}$ ) |
|-----------|----------------------------------------|----------------------------------------|
| 0.025     | 8.00e-07                               | 1.56e-06                               |
| 0.05      | 3.32e-06                               | 4.37e-06                               |
| 0.10      | 6.40e-06                               | 5.88e-06                               |
| 0.15      | 9.59e-06                               | 7.96e-06                               |
| 0.20      | 7.50e-06                               | 5.31e-06                               |
| 0.25      | 8.21e-06                               | 6.03e-06                               |

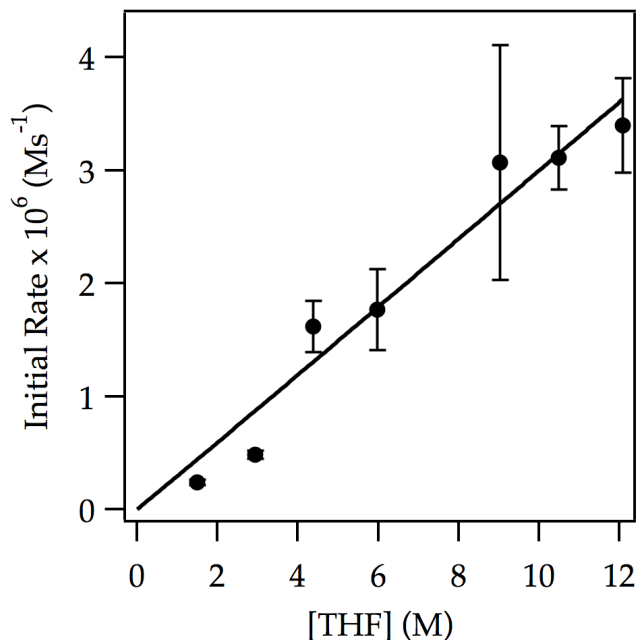

**Figure 25.** Plot of initial rate versus [THF] in hexanes for the ortholithiation of **1** (0.005 M) by LDA (0.20 M) at  $-78\text{ }^{\circ}\text{C}$  measured by IR spectroscopy. The curve depicts an unweighted least-squares fit to  $y = a[\text{THF}]^n$ . [ $a = (3 \pm 1) \times 10^{-7}$ ,  $n = (1.0 \pm 0.1)$ ]

| [THF] (M) | $y_1$ (M·s <sup>-1</sup> ) | $y_2$ (M·s <sup>-1</sup> ) | $y_3$ (M·s <sup>-1</sup> ) | $y_4$ (M·s <sup>-1</sup> ) |
|-----------|----------------------------|----------------------------|----------------------------|----------------------------|
| 12.08     | 3.07e-06                   | 3.21e-06                   | 3.32e-06                   | 4.01e-06                   |
| 10.48     | 2.91e-06                   | 3.31e-06                   | -----                      | -----                      |
| 9.03      | 3.80e-06                   | 2.33e-06                   | -----                      | -----                      |
| 5.98      | 2.02e-06                   | 1.51e-06                   | -----                      | -----                      |
| 4.38      | 1.78e-06                   | 1.46e-06                   | -----                      | -----                      |
| 2.93      | 4.57e-07                   | 5.05e-07                   | -----                      | -----                      |
| 1.50      | 2.17e-07                   | 2.54e-07                   | -----                      | -----                      |

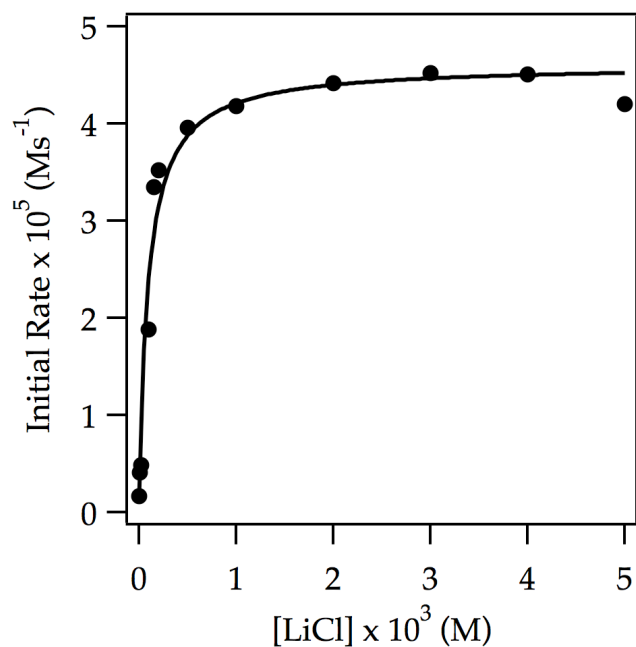

**Figure 26.** Plot of initial rate versus [LiCl] for the ortholithiation of **1** (0.05 M) by 0.10 M LDA in 12.2 M THF at  $-78\text{ }^{\circ}\text{C}$  measured by IR spectroscopy. The curve depicts an unweighted least-squares fit to  $-\Delta[\text{ArH}]/\Delta t|_{t=0} = (a[\text{LiCl}])/(1 + b[\text{LiCl}]) + c$ . [ $a = (4.5 \pm 0.8) \times 10^{-1}$ ,  $b = (1.0 \pm 0.20) \times 10^4$ ,  $c = (1.70) \times 10^{-6}$ ]

| [LiCl x 10 <sup>3</sup> ] (M) | $y_1$ (Ms <sup>-1</sup> ) |
|-------------------------------|---------------------------|
| 0.00                          | 1.70e-07                  |
| 0.01                          | 4.08e-06                  |
| 0.02                          | 4.87e-06                  |
| 0.10                          | 1.88e-06                  |
| 0.15                          | 3.35e-06                  |
| 0.20                          | 3.52e-06                  |
| 0.50                          | 3.96e-06                  |
| 1.00                          | 4.18e-05                  |
| 2.00                          | 4.42e-05                  |
| 3.00                          | 4.52e-05                  |
| 4.00                          | 4.51e-05                  |
| 5.00                          | 4.20e-05                  |

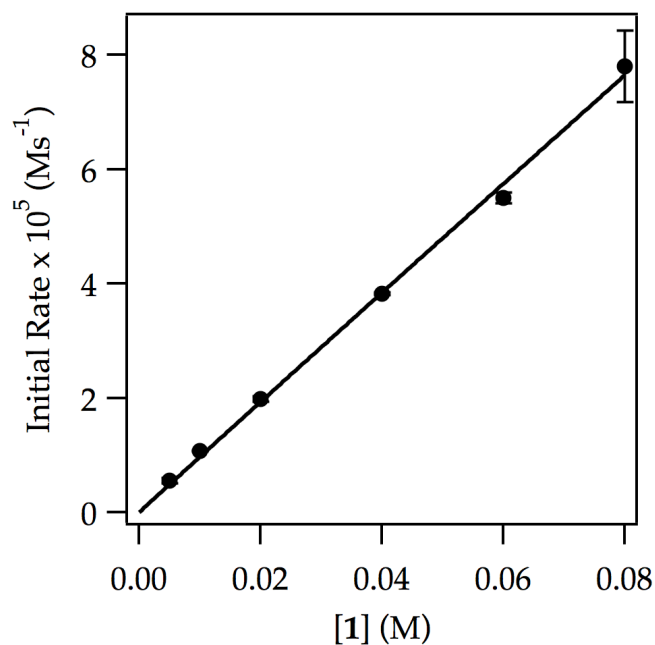

**Figure 27.** Plot of initial rate vs [ArH] (initial arene concentration) for the ortholithiation of **1** with LDA (0.10 M) in THF (12.2 M) with 1.0 mol% LiCl at  $-78$  °C measured by IR spectroscopy. The curve depicts an unweighted least-squares fit to  $y = a[\text{ArH}]^n$ . [ $a = (9 \pm 1) \times 10^{-4}$ ,  $n = (0.99 \pm 0.04)$ ]

| [1] (M) | $y_1$ (Ms <sup>-1</sup> ) | $y_2$ (Ms <sup>-1</sup> ) |
|---------|---------------------------|---------------------------|
| 0.005   | 5.19e-06                  | 5.89e-06                  |
| 0.01    | 1.06e-05                  | 1.08e-05                  |
| 0.02    | 2.02e-05                  | 1.95e-05                  |
| 0.04    | 3.85e-05                  | 3.81e-05                  |
| 0.06    | 5.57e-05                  | 5.44e-05                  |
| 0.08    | 8.25e-05                  | 7.36e-05                  |

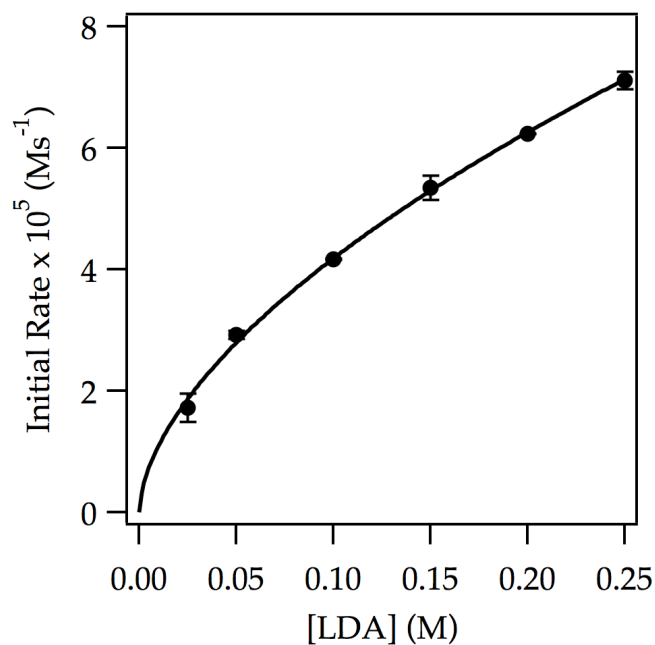

**Figure 28.** Plot of initial rate versus [LDA] in THF (12.2 M) for the ortholithiation of **1** (0.050 M) in the presence of 1.0 mol% LiCl at  $-78\text{ }^{\circ}\text{C}$  measured by IR spectroscopy. The curve depicts an unweighted least-squares fit to  $y = a[\text{LDA}]^n$ . [ $a = (1.60 \pm 0.05) \times 10^{-4}$ ,  $n = 0.58 \pm 0.02$ ]

| [LDA] (M) | $y_1$ ( $\text{M}\cdot\text{s}^{-1}$ ) | $y_2$ ( $\text{M}\cdot\text{s}^{-1}$ ) |
|-----------|----------------------------------------|----------------------------------------|
| 0.025     | 1.88e-05                               | 1.55e-05                               |
| 0.05      | 2.96e-05                               | 2.87e-05                               |
| 0.10      | 4.17e-05                               | 4.16e-05                               |
| 0.15      | 5.49e-05                               | 5.20e-05                               |
| 0.20      | 6.23e-05                               | 6.23e-05                               |
| 0.25      | 7.00e-05                               | 7.21e-05                               |



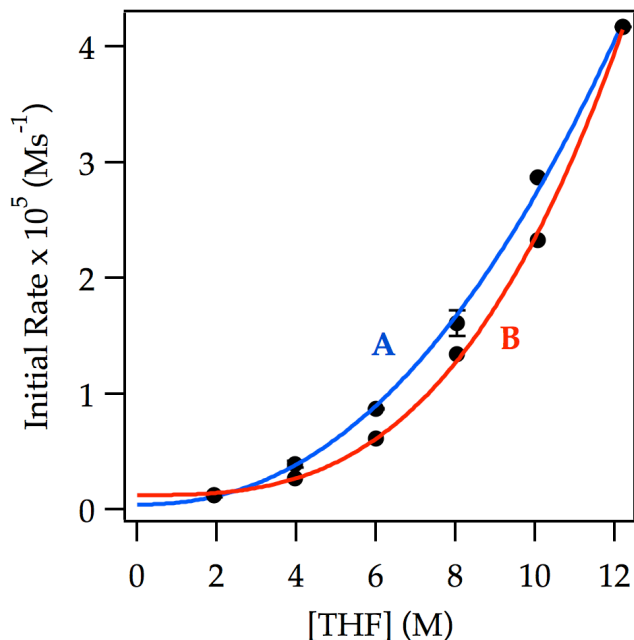

**Figure 29.** Plot of initial rate versus [THF] in Et<sub>2</sub>O (curve A) and in hexanes (curve B) cosolvent for the ortholithiation of **1** (0.05 M) by LDA (0.10 M) in the presence of 1.0 mol% LiCl at -78 °C. The data was measured by IR spectroscopy. The curves depict unweighted least-squares fits to  $y = a[\text{THF}]^n + b$ . **Curve A:**  $a = (1.8 \pm 0.3) \times 10^{-7}$ ,  $n = 2.18 \pm 0.08$ ,  $b = (0.0 \pm 0.1) \times 10^{-7}$ . **Curve B:**  $a = (2.3 \pm 0.7) \times 10^{-8}$ ,  $n = 3.0 \pm 0.1$ ,  $b = (1.2 \pm 0.4) \times 10^{-6}$ .

| [THF] (M) | $y_{1\text{-A}}$ (Ms <sup>-1</sup> ) | $y_{2\text{-A}}$ (Ms <sup>-1</sup> ) | $y_{3\text{-B}}$ (Ms <sup>-1</sup> ) |
|-----------|--------------------------------------|--------------------------------------|--------------------------------------|
| 12.2      | 4.17e-05                             | 4.17e-05                             | 4.17e-05                             |
| 10.07     | 2.88e-05                             | 2.86e-05                             | 2.33e-05                             |
| 8.03      | 1.53e-05                             | 1.69e-05                             | 1.34e-05                             |
| 6.00      | 8.74e-06                             | 8.64e-06                             | 6.15e-06                             |
| 3.97      | 3.71e-06                             | 4.15e-06                             | 2.66e-06                             |
| 1.93      | 1.12e-06                             | 1.38e-06                             | 1.24e-06                             |

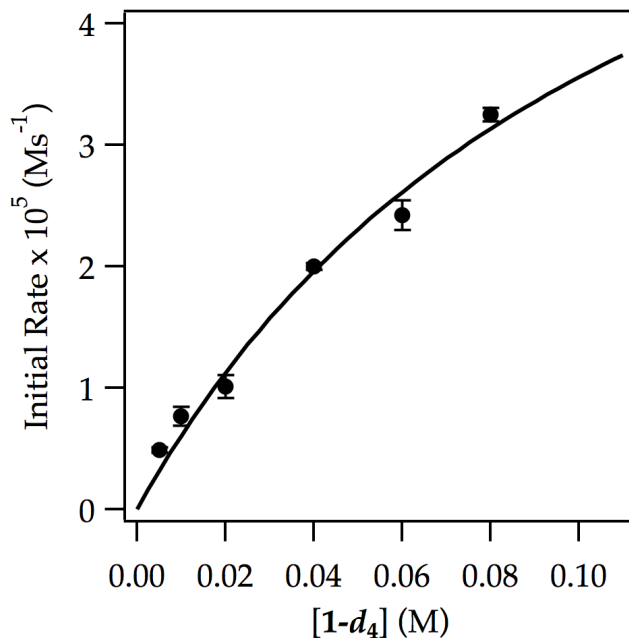

**Figure 30.** Plot of initial rate vs  $[\text{ArD}_4]$  (initial arene concentration) for the ortholithiation of  $\mathbf{1-d}_4$  with LDA (0.10 M) in THF (12.2 M) at  $-42^\circ\text{C}$  measured by  $^{19}\text{F}$  NMR spectroscopy. The curve depicts an unweighted least-squares fit to a first-order saturation function:  $-\Delta[\text{ArD}_4]/\Delta t|_{t=0} = (a[\text{ArD}_4])/(1 + b[\text{ArD}_4])$ . [ $a = (6 \pm 1) \times 10^{-4}$ ,  $b = (8 \pm 4)$ ]

| $[\mathbf{1-d}_4]$ (M) | $y_1$ ( $\text{M}\cdot\text{s}^{-1}$ ) | $y_2$ ( $\text{M}\cdot\text{s}^{-1}$ ) |
|------------------------|----------------------------------------|----------------------------------------|
| 0.005                  | 4.74e-06                               | 5.09e-06                               |
| 0.01                   | 7.10e-06                               | 8.20e-06                               |
| 0.02                   | 1.08e-05                               | 9.47e-06                               |
| 0.04                   | 2.02e-05                               | 1.98e-05                               |
| 0.06                   | 2.51e-05                               | 2.34e-05                               |
| 0.08                   | 3.21e-05                               | 3.29e-05                               |

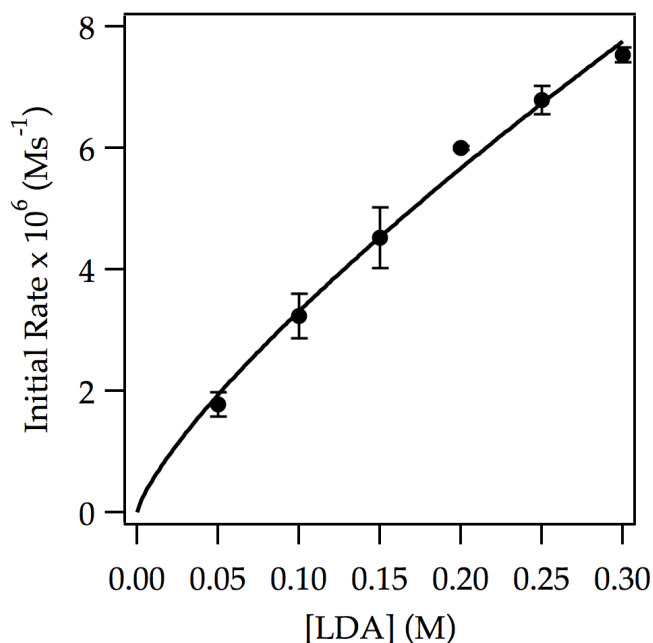

**Figure 31.** Plot of initial rate versus [LDA] in THF (12.2 M) for the ortholithiation of **1-d<sub>4</sub>** (0.005 M) at  $-42\text{ }^{\circ}\text{C}$  measured by  $^{19}\text{F}$  NMR spectroscopy. The curve depicts an unweighted least-squares fit to  $y = a[\text{LDA}]^n$ . [ $a = (2.0 \pm 0.1) \times 10^{-5}$ ,  $n = 0.77 \pm 0.04$ ]

| [LDA] (M) | $y_1$ (Ms <sup>-1</sup> ) | $y_2$ (Ms <sup>-1</sup> ) |
|-----------|---------------------------|---------------------------|
| 0.05      | 1.64e-06                  | 1.92e-06                  |
| 0.10      | 2.98e-06                  | 3.50e-06                  |
| 0.15      | 4.18e-06                  | 4.88e-06                  |
| 0.20      | 5.98e-06                  | 6.03e-06                  |
| 0.25      | 6.63e-06                  | 6.95e-06                  |
| 0.30      | 7.45e-06                  | 7.63e-06                  |

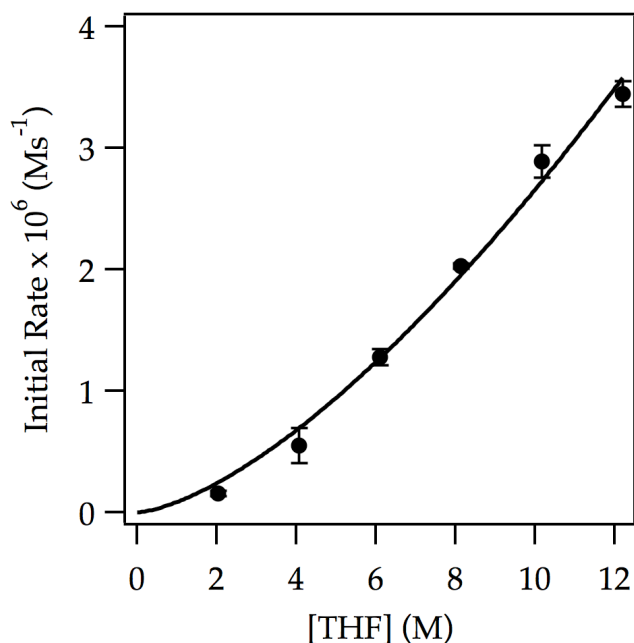

**Figure 32.** Plot of initial rate versus [THF] in Et<sub>2</sub>O cosolvent for the ortholithiation of **1-d<sub>4</sub>** (0.005 M) by LDA (0.10 M) at -42 °C measured by <sup>19</sup>F NMR spectroscopy. The curve depicts an unweighted least-squares fit to  $y = a[\text{THF}]^n$ . [ $a = (8 \pm 2) \times 10^{-5}$ ,  $n = (1.5 \pm 0.1)$ ]

| [THF] (M) | $y_1$ (M·s <sup>-1</sup> ) | $y_2$ (M·s <sup>-1</sup> ) |
|-----------|----------------------------|----------------------------|
| 12.2      | 3.52e-06                   | 3.37e-06                   |
| 10.17     | 2.99e-06                   | 2.80e-06                   |
| 8.13      | 2.04e-06                   | 2.03e-06                   |
| 6.10      | 1.23e-06                   | 1.33e-06                   |
| 4.07      | 0.45e-06                   | 0.66e-06                   |
| 2.03      | 0.17e-06                   | 0.14e-06                   |

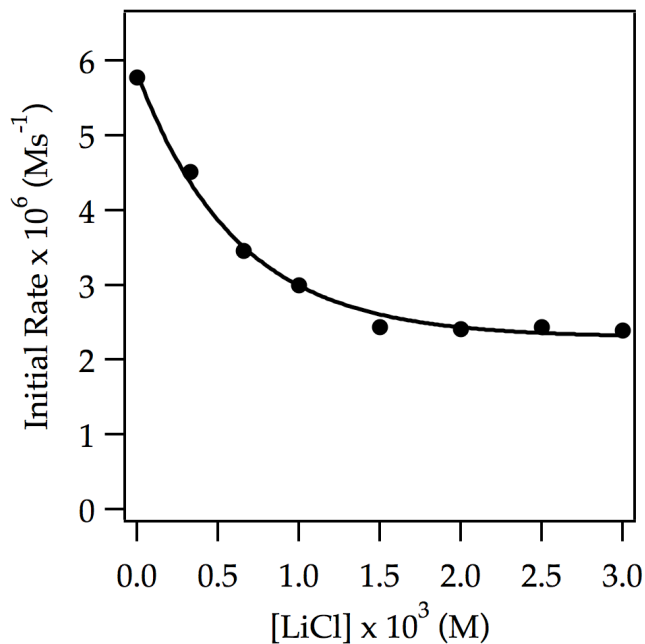

**Figure 33.** Plot of initial rate versus [LiCl] for the ortholithiation of **1-*d*<sub>4</sub>** (0.005 M) by 0.30 M LDA in 12.2 M THF at  $-42\text{ }^{\circ}\text{C}$  measured by  $^{19}\text{F}$  NMR spectroscopy. The curve has no physical meaning.

| [LiCl × 10 <sup>3</sup> ] (M) | $y_1$ (Ms <sup>-1</sup> ) |
|-------------------------------|---------------------------|
| 0.00                          | 5.78e-06                  |
| 0.33                          | 4.51e-06                  |
| 0.66                          | 3.46e-06                  |
| 1.00                          | 3.00e-06                  |
| 1.50                          | 2.44e-06                  |
| 2.00                          | 2.41e-06                  |
| 2.50                          | 2.44e-06                  |
| 3.00                          | 2.39e-06                  |

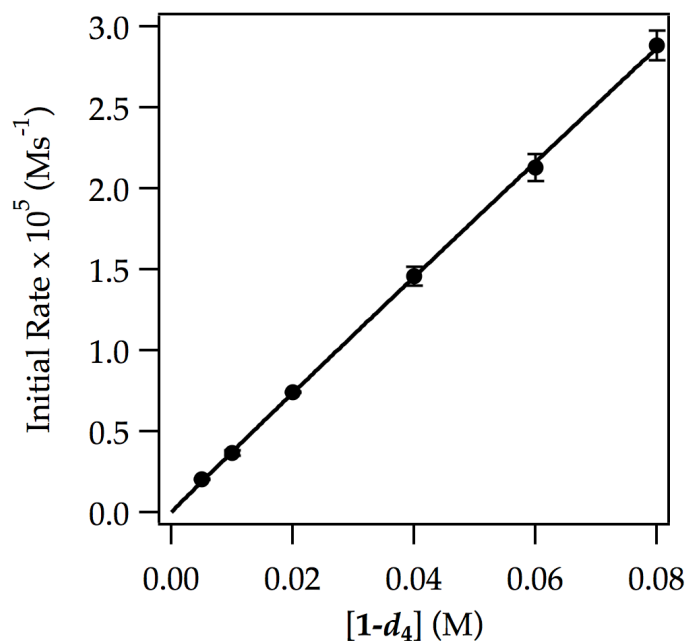

**Figure 34.** Plot of initial rate versus  $[\text{ArD}_4]$  for the ortholithiation of  $\mathbf{1-d}_4$  (0.005 M) by LDA (0.10 M) in the presence of 3.0 mol% LiCl at  $-42\text{ }^\circ\text{C}$  measured by  $^{19}\text{F}$  NMR spectroscopy. The curve depicts an unweighted least-squares fit to  $y = a[\text{ArD}_4]^n$ . [ $a = (3.4 \pm 0.1) \times 10^{-4}$ ,  $n = (0.98 \pm 0.01)$ ]

| $[\mathbf{1-d}_4]$ (M) | $y_1$ (Ms <sup>-1</sup> ) | $y_2$ (Ms <sup>-1</sup> ) |
|------------------------|---------------------------|---------------------------|
| 0.005                  | 2.03e-06                  | 2.08e-06                  |
| 0.01                   | 3.79e-06                  | 3.58e-06                  |
| 0.02                   | 7.46e-06                  | 7.41e-06                  |
| 0.04                   | 1.50e-05                  | 1.42e-05                  |
| 0.06                   | 2.19e-05                  | 2.07e-05                  |
| 0.08                   | 2.82e-05                  | 2.95e-05                  |

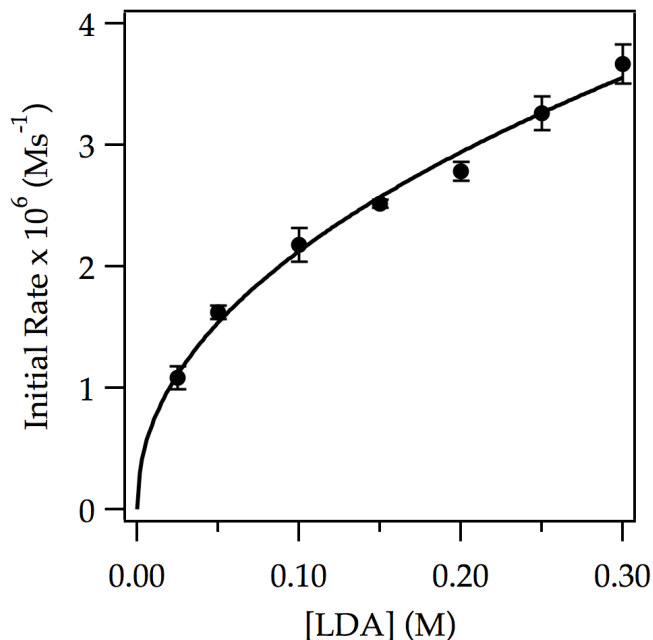

**Figure 35.** Plot of initial rate versus [LDA] in THF (12.2 M) for the ortholithiation of **1-d<sub>4</sub>** (0.005 M) in the presence of 3.0 mol% LiCl at -42 °C measured by <sup>19</sup>F NMR spectroscopy. The curve depicts an unweighted least-squares fit to  $y = a[\text{LDA}]^n$ . [ $a = (6.2 \pm 0.3) \times 10^{-6}$ ,  $n = 0.46 \pm 0.03$ ]

| [LDA] (M) | $y_1$ (Ms <sup>-1</sup> ) | $y_2$ (Ms <sup>-1</sup> ) |
|-----------|---------------------------|---------------------------|
| 0.025     | 1.02e-06                  | 1.15e-06                  |
| 0.05      | 1.58e-06                  | 1.66e-06                  |
| 0.10      | 2.08e-06                  | 2.28e-06                  |
| 0.15      | 2.54e-06                  | 2.49e-06                  |
| 0.20      | 2.73e-06                  | 2.84e-06                  |
| 0.25      | 3.16e-06                  | 3.36e-06                  |
| 0.30      | 3.55e-06                  | 3.78e-06                  |

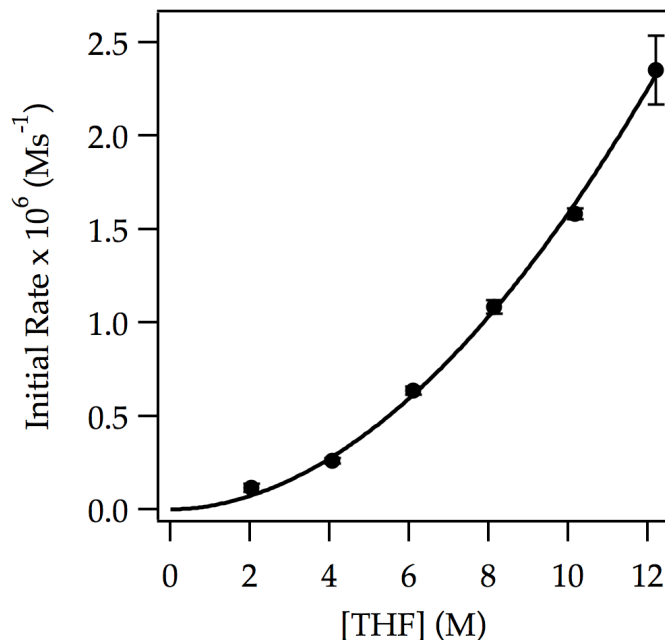

**Figure 36.** Plot of initial rate versus [THF] in Et<sub>2</sub>O cosolvent for the ortholithiation of **1-d<sub>4</sub>** (0.005 M) by LDA (0.10 M) in the presence of 3.0 mol% LiCl at -42 °C measured by <sup>19</sup>F NMR spectroscopy. The curve depicts an unweighted least-squares fit to  $y = a[\text{THF}]^n$ . [ $a = (1.9 \pm 0.3) \times 10^{-8}$ ,  $n = (1.92 \pm 0.07)$ ]

| [THF] (M) | $y_1$ (M·s <sup>-1</sup> ) | $y_2$ (M·s <sup>-1</sup> ) |
|-----------|----------------------------|----------------------------|
| 12.2      | 2.48e-06                   | 2.22e-06                   |
| 10.17     | 1.56e-06                   | 1.60e-06                   |
| 8.13      | 1.06e-06                   | 1.11e-06                   |
| 6.10      | 6.20e-07                   | 6.50e-07                   |
| 4.07      | 2.50e-07                   | 2.70e-07                   |
| 2.03      | 1.30e-07                   | 1.00e-07                   |



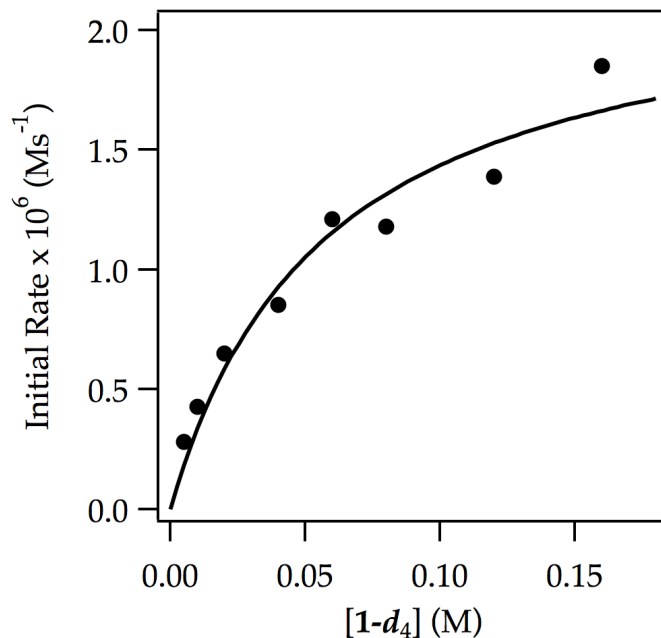

**Figure 37.** Plot of initial rate vs  $[\text{ArD}_4]$  (initial arene concentration) for the ortholithiation of  $\mathbf{1-d}_4$  with LDA (0.10 M) in THF (12.2 M) with at  $-78\text{ }^\circ\text{C}$  measured by IR spectroscopy. The curve depicts an unweighted least-squares fit to a first-order saturation function:  $-\Delta[\text{ArD}_4]/\Delta t|_{t=0} = (a[\text{ArD}_4])/(1 + b[\text{ArD}_4])$ . [ $a = (3.9 \pm 0.8) \times 10^{-5}$ ,  $b = (17 \pm 5)$ ]

| $[\mathbf{1-d}_4]$ (M) | $y_1$ (Ms <sup>-1</sup> ) |
|------------------------|---------------------------|
| 0.005                  | 2.81e-07                  |
| 0.01                   | 4.28e-07                  |
| 0.02                   | 6.51e-07                  |
| 0.04                   | 8.53e-07                  |
| 0.06                   | 1.21e-06                  |
| 0.08                   | 1.18e-06                  |
| 0.12                   | 1.39e-06                  |
| 0.16                   | 1.85e-06                  |

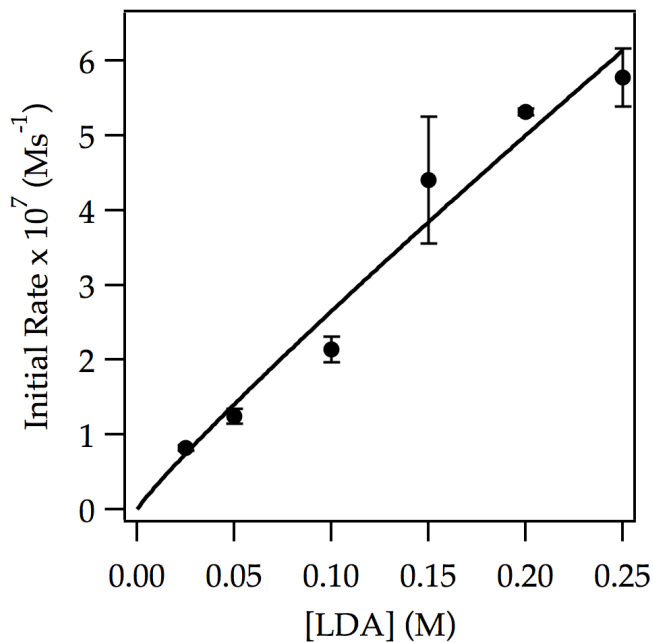

**Figure 38.** Plot of initial rate versus [LDA] in THF (12.2 M) for the ortholithiation of **1-d<sub>4</sub>** (0.005 M) at -78 °C measured by IR spectroscopy. The curve depicts an unweighted least-squares fit to  $y = a[\text{LDA}]^n$ . [ $a = (2.2 \pm 0.5) \times 10^{-6}$ ,  $n = 0.9 \pm 0.1$ ]

| [LDA] (M) | $y_1$ (Ms <sup>-1</sup> ) | $y_2$ (Ms <sup>-1</sup> ) |
|-----------|---------------------------|---------------------------|
| 0.025     | 8.43e-06                  | 7.98e-06                  |
| 0.05      | 1.18e-06                  | 1.32e-06                  |
| 0.10      | 2.02e-06                  | 2.26e-06                  |
| 0.15      | 5.01e-06                  | 3.81e-06                  |
| 0.20      | 5.28e-06                  | 5.35e-06                  |
| 0.25      | 6.05e-06                  | 5.50e-06                  |

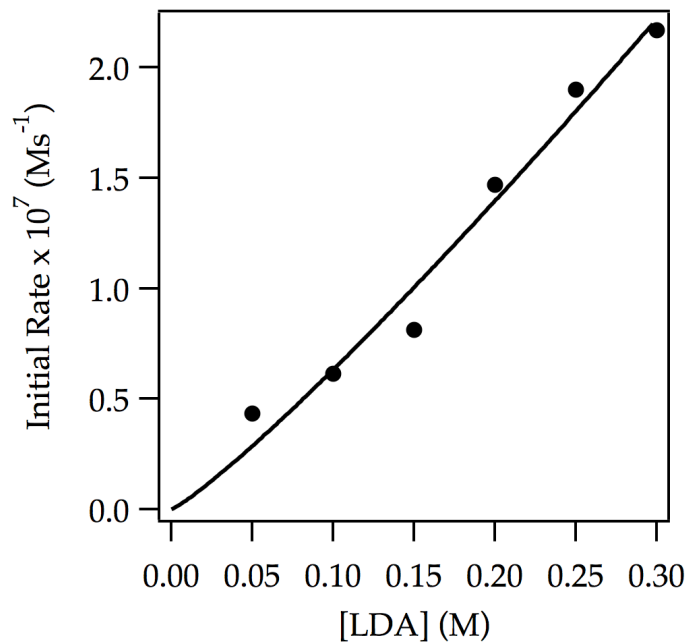

**Figure 39.** Plot of initial rate versus [LDA] in THF (3.05 M) for the ortholithiation of **1-d<sub>4</sub>** (0.005 M) at -78 °C measured by IR spectroscopy. The curve depicts an unweighted least-squares fit to  $y = a[\text{LDA}]^n$ . [ $a = (9 \pm 2) \times 10^{-7}$ ,  $n = 1.1 \pm 0.1$ ]

| [LDA] (M) | $y_1$ (Ms <sup>-1</sup> ) |
|-----------|---------------------------|
| 0.025     | 4.33e-08                  |
| 0.05      | 6.13e-08                  |
| 0.10      | 8.12e-08                  |
| 0.15      | 1.47e-07                  |
| 0.20      | 1.90e-07                  |
| 0.25      | 2.17e-07                  |

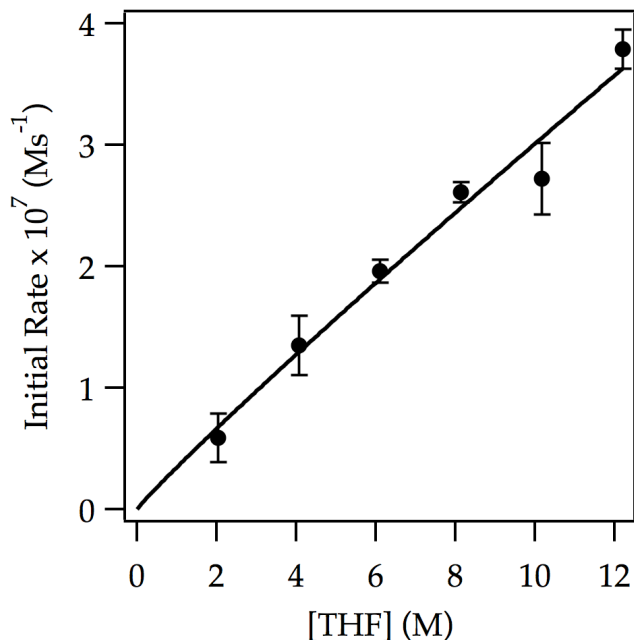

**Figure 40.** Plot of initial rate versus [THF] in hexanes for the ortholithiation of **1-*d*<sub>4</sub>** (0.005 M) by LDA (0.10 M) at  $-78\text{ }^{\circ}\text{C}$  measured by IR spectroscopy. The curve depicts an unweighted least-squares fit to  $y = a[\text{THF}]^n$ . [ $a = (3.5 \pm 0.8) \times 10^{-8}$ ,  $n = (0.94 \pm 0.09)$ ]

| [THF] (M) | $y_1$ (M·s <sup>-1</sup> ) | $y_2$ (M·s <sup>-1</sup> ) |
|-----------|----------------------------|----------------------------|
| 12.2      | 3.90e-07                   | 3.67e-07                   |
| 10.17     | 2.93e-07                   | 2.51e-07                   |
| 8.13      | 2.55e-07                   | 2.67e-07                   |
| 6.10      | 2.02e-07                   | 1.89e-07                   |
| 4.07      | 1.52e-07                   | 1.17e-07                   |
| 2.03      | 4.50e-08                   | 7.31e-08                   |

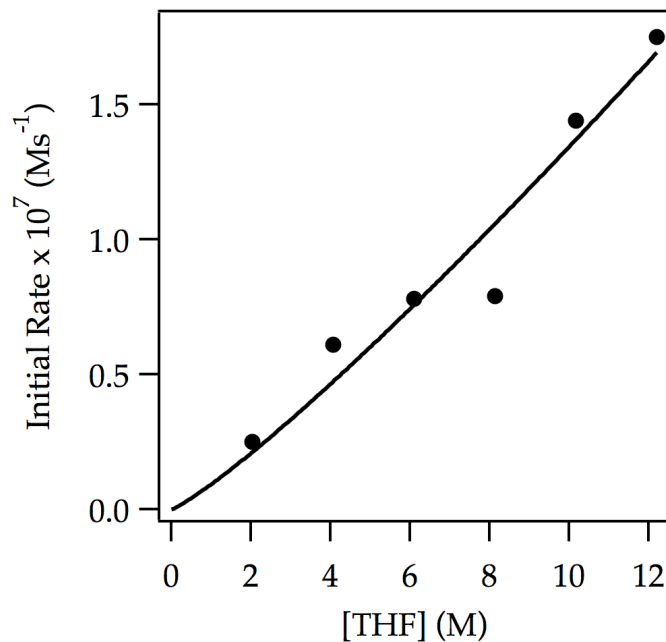

**Figure 41.** Plot of initial rate versus [THF] in hexanes for the ortholithiation of **1-*d*<sub>4</sub>** (0.005 M) by LDA (0.050 M) at  $-78\text{ }^{\circ}\text{C}$  measured by IR spectroscopy. The curve depicts an unweighted least-squares fit to  $y = a[\text{THF}]^n$ . [ $a = (9 \pm 4) \times 10^{-9}$ ,  $n = (1.2 \pm 0.2)$ ]

| [THF] (M) | $y_1$ (Ms <sup>-1</sup> ) |
|-----------|---------------------------|
| 12.2      | 1.75e-07                  |
| 10.17     | 1.44e-07                  |
| 8.13      | 7.91e-08                  |
| 6.10      | 7.79e-08                  |
| 4.07      | 6.10e-08                  |
| 2.03      | 2.51e-08                  |

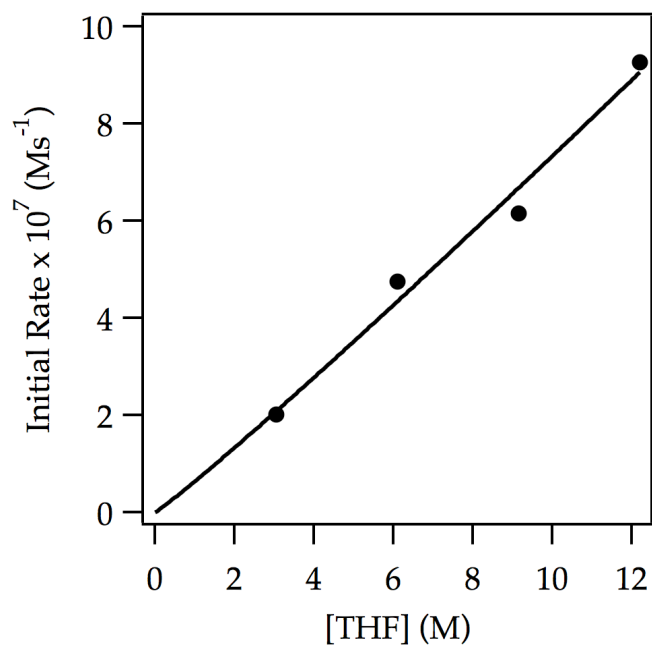

**Figure 42.** Plot of initial rate versus [THF] in hexanes for the ortholithiation of **1-*d*<sub>4</sub>** (0.005 M) by LDA (0.20 M) at -78 °C measured by IR spectroscopy. The curve depicts an unweighted least-squares fit to  $y = a[\text{THF}]^n$ . [ $a = (6 \pm 2) \times 10^{-8}$ ,  $n = (1.1 \pm 0.1)$ ]

| [THF] (M) | $y_1$ (Ms <sup>-1</sup> ) |
|-----------|---------------------------|
| 12.2      | 9.27e-07                  |
| 9.15      | 6.15e-07                  |
| 6.10      | 4.75e-07                  |
| 3.05      | 2.01e-07                  |

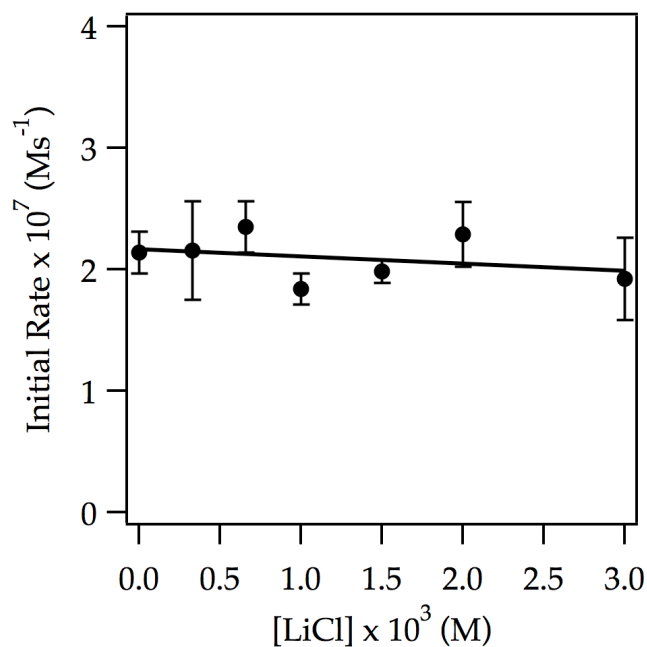

**Figure 43.** Plot of initial rate versus [LiCl] for the ortholithiation of **1-d<sub>4</sub>** (0.005 M) by 0.10 M LDA in 12.2 M THF at -78 °C measured by IR spectroscopy. The curve depicts an unweighted least-squares fit to  $y = a[\text{LiCl}] + b$ . [ $a = (6 \pm 8) \times 10^{-9}$ ,  $b = (2.2 \pm 0.1) \times 10^{-7}$ ]

| [LiCl] × 10 <sup>3</sup> (M) | $y_1$ (Ms <sup>-1</sup> ) | $y_2$ (Ms <sup>-1</sup> ) |
|------------------------------|---------------------------|---------------------------|
| 0.00                         | 2.02e-07                  | 2.26e-07                  |
| 0.33                         | 2.44e-07                  | 1.87e-07                  |
| 0.66                         | 2.20e-07                  | 2.50e-07                  |
| 1.00                         | 1.93e-07                  | 1.75e-07                  |
| 1.50                         | 2.05e-07                  | 1.92e-07                  |
| 2.00                         | 2.48e-07                  | 2.10e-07                  |
| 3.00                         | 2.16e-07                  | 1.68e-07                  |

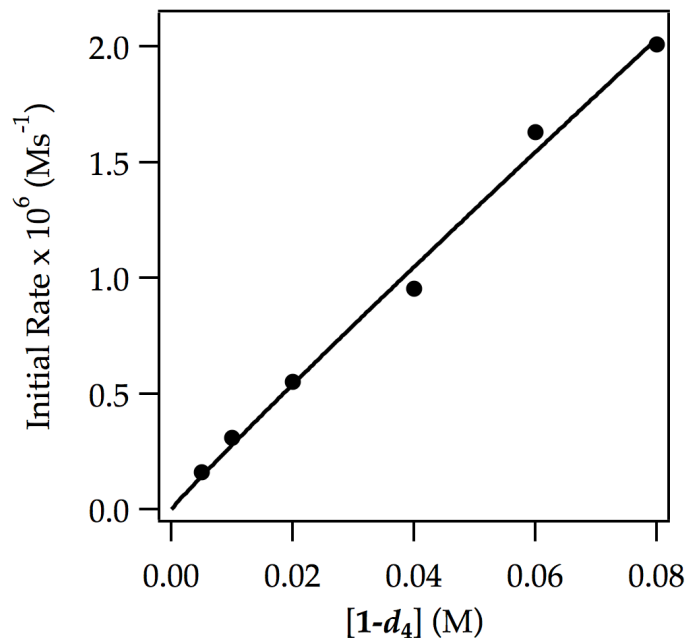

**Figure 44.** Plot of initial rate versus  $[\text{ArD}_4]$  for the ortholithiation of  $\mathbf{1-d}_4$  (0.005 M) by LDA (0.10 M) in the presence of 2.0 mol% LiCl at  $-78\text{ }^\circ\text{C}$  measured by IR spectroscopy. The curve depicts an unweighted least-squares fit to  $y = a[\text{ArD}_4]^n$ . [ $a = (2.3 \pm 0.4) \times 10^{-5}$ ,  $n = (0.96 \pm 0.06)$ ]

| $[\mathbf{1-d}_4]$ (M) | $y_1$ (Ms <sup>-1</sup> ) |
|------------------------|---------------------------|
| 0.005                  | 1.59e-07                  |
| 0.01                   | 3.08e-07                  |
| 0.02                   | 5.50e-07                  |
| 0.04                   | 9.53e-07                  |
| 0.06                   | 1.63e-06                  |
| 0.08                   | 2.01e-06                  |



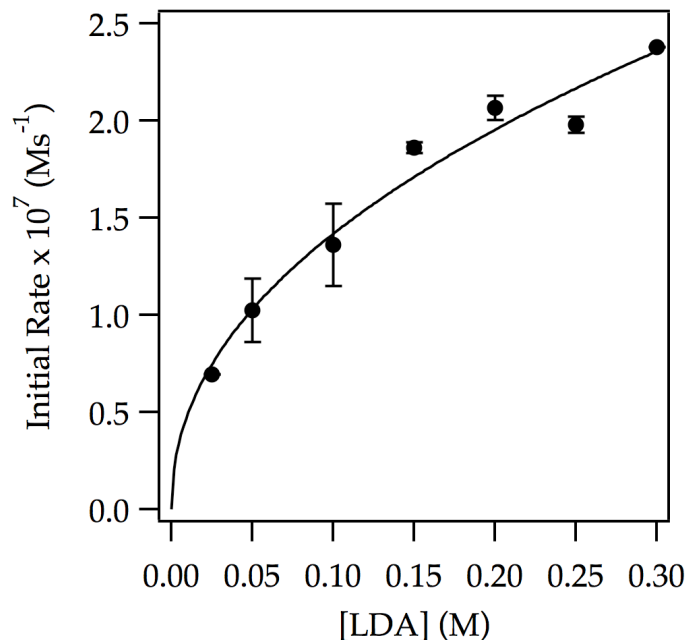

**Figure 45.** Plot of initial rate versus [LDA] in THF (12.2 M) for the ortholithiation of **1-d<sub>4</sub>** (0.005 M) in the presence of 2.0 mol% LiCl at -78 °C measured by IR spectroscopy. The curve depicts an unweighted least-squares fit to  $y = a[\text{LDA}]^n$ . [ $a = (4.1 \pm 0.4) \times 10^{-7}$ ,  $n = 0.46 \pm 0.05$ ]

| [LDA] (M) | $y_1$ (Ms <sup>-1</sup> ) | $y_2$ (Ms <sup>-1</sup> ) |
|-----------|---------------------------|---------------------------|
| 0.025     | 6.96e-08                  | 7.11e-06                  |
| 0.05      | 9.08e-08                  | 1.14e-07                  |
| 0.10      | 1.51e-07                  | 1.21e-07                  |
| 0.15      | 1.84e-07                  | 1.88e-07                  |
| 0.20      | 2.02e-07                  | 2.11e-07                  |
| 0.25      | 2.01e-07                  | 1.95e-07                  |
| 0.30      | 2.38e-07                  | 2.38e-07                  |

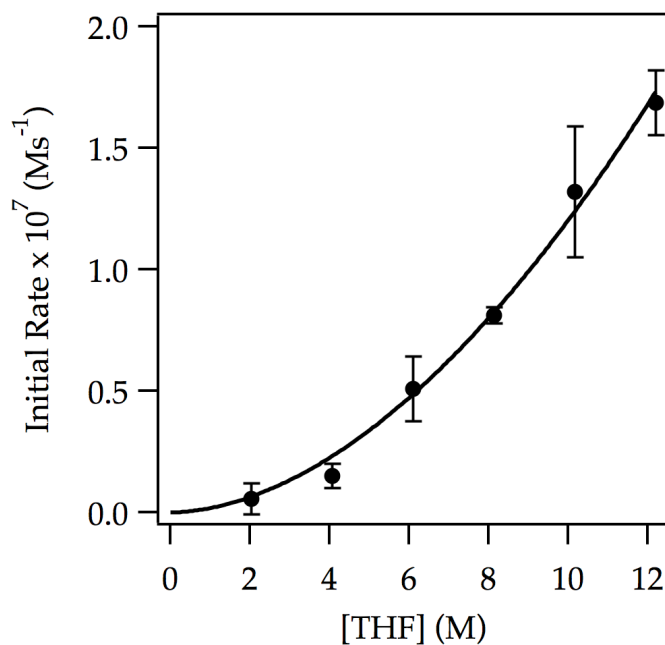

**Figure 46.** Plot of initial rate versus [THF] in Et<sub>2</sub>O for the ortholithiation of **1-d<sub>4</sub>** (0.005 M) by LDA (0.10 M) in the presence of 2.0 mol% LiCl at -78 °C measured by IR spectroscopy. The curve depicts an unweighted least-squares fit to  $y = a[\text{THF}]^n$ . [ $a = (1.8 \pm 0.5) \times 10^{-9}$ ,  $n = (1.8 \pm 0.1)$ ]

| [THF] (M) | $y_1$ (M·s <sup>-1</sup> ) | $y_2$ (M·s <sup>-1</sup> ) |
|-----------|----------------------------|----------------------------|
| 12.2      | 1.78e-07                   | 1.59e-07                   |
| 10.17     | 1.51e-07                   | 1.13e-07                   |
| 8.13      | 7.88e-08                   | 8.36e-08                   |
| 6.10      | 6.03e-08                   | 4.16e-08                   |
| 4.07      | 1.85e-08                   | 1.16e-08                   |
| 2.03      | 1.01e-08                   | 9.20e-09                   |

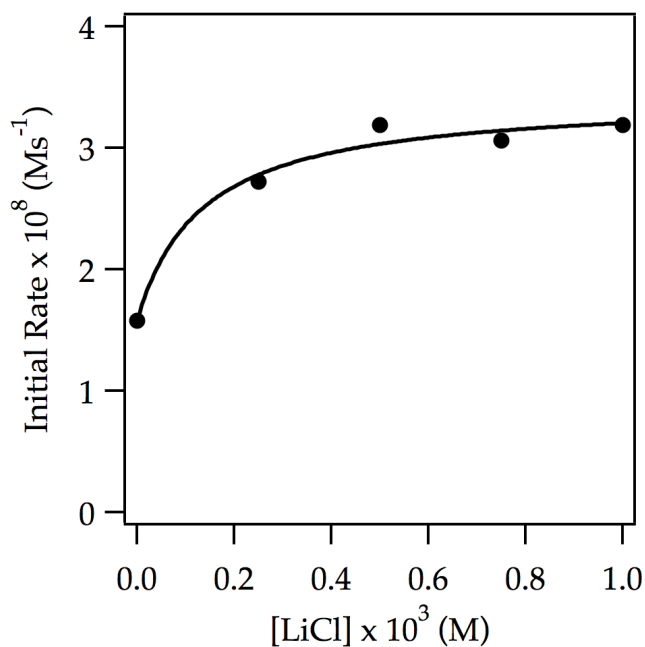

**Figure 47.** Plot of initial rate versus [LiCl] for the ortholithiation of **1-d<sub>4</sub>** (0.005 M) by 0.10 M LDA in 12.2 M THF at -90 °C measured by IR spectroscopy. The curve depicts an unweighted least-squares fit to  $-\Delta[\text{ArD}]/\Delta t|_{t=0} = (a[\text{LiCl}])/(1 + b[\text{LiCl}]) + c$ . [ $a = (1.4 \pm 0.5) \times 10^{-7}$ ,  $b = 7 \pm 3$ ,  $c = 1.58 \times 10^{-8}$ ]

| [LiCl × 10 <sup>3</sup> ] (M) | $y_1$ (Ms <sup>-1</sup> ) |
|-------------------------------|---------------------------|
| 0.00                          | 1.58e-06                  |
| 0.33                          | 2.72e-06                  |
| 0.66                          | 3.19e-06                  |
| 1.00                          | 3.06e-06                  |
| 1.50                          | 3.19e-06                  |

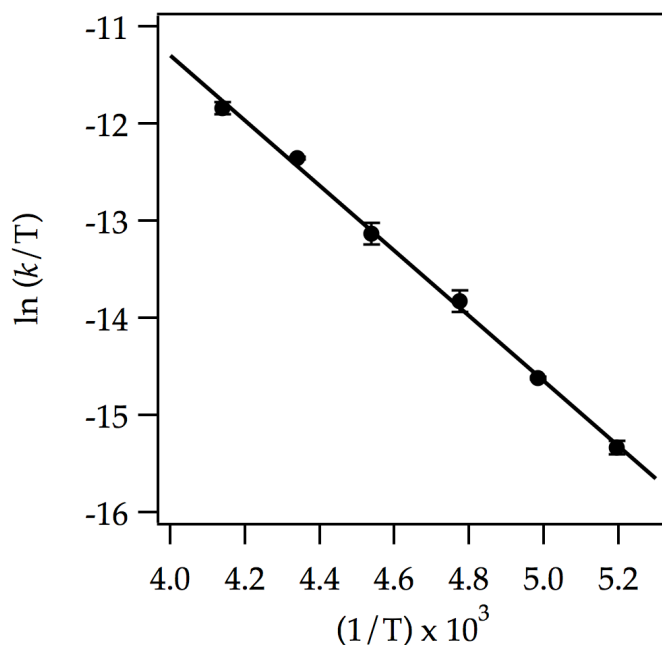

**Figure 48.** Plot of  $\ln(k/T)$  versus  $(1/T)$  for the ortholithiation of **1-d<sub>4</sub>** (0.005 M) by LDA (0.10 M) in THF (12.2 M) at various temperatures measured by <sup>19</sup>F NMR spectroscopy. The curve depicts an unweighted least-squares fit to  $y = a(1/T) + b$ . [ $a = -(3.35 \pm 0.08) \times 10^3$ ,  $b = (2.1 \pm 0.4)$ ]. Fit corresponds to  $\Delta H^\ddagger = (6.6 \pm 0.2)$  kcal/mol and  $\Delta S^\ddagger = (-43 \pm 8)$  cal/(molK).

| Temperature (K) | $k_1(\text{M}^{-2}\text{s}^{-1})$ | $k_2(\text{M}^{-2}\text{s}^{-1})$ |
|-----------------|-----------------------------------|-----------------------------------|
| 241.55          | 1.82e-03                          | 1.67e-03                          |
| 230.45          | 1.01e-03                          | 9.85e-03                          |
| 220.35          | 4.03e-04                          | 4.74e-04                          |
| 209.45          | 2.14e-04                          | 1.92e-04                          |
| 200.65          | 8.92e-05                          | 9.08e-05                          |
| 192.45          | 4.44e-05                          | 4.03e-05                          |

**Scheme 1.** Scheme of dimer- and monomer-based lithations.

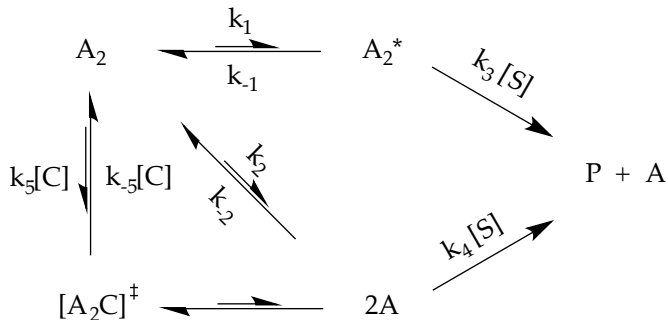

The system of differential equations that describes this mechanism follows.

$$\begin{aligned} \frac{d[A_2]}{dt} &= -k_1[A_2] + k_{-1}[A_2^*] - (k_2 + k_5[C])[A_2] + (k_{-2} + k_{-5}[C])[A]^2 \\ \frac{d[A_2^*]}{dt} &= k_1[A_2] - k_{-1}[A_2^*] - k_3[A_2^*][S] \\ \frac{d[A]}{dt} &= 2(k_2 + k_5[C])[A_2] - 2(k_{-2} + k_{-5}[C])[A]^2 - k_4[A][S] + k_3[A_2^*][S] \\ \frac{d[S]}{dt} &= -k_3[A_2^*][S] - k_4[A][S] \\ \frac{d[P]}{dt} &= k_3[A_2^*][S] + k_4[A][S] \end{aligned}$$

In order that the system conforms to mass balance both in the absence and presence of catalyst C, it must be that

$$k_{-5} = k_5 \frac{k_{-2}}{k_2}$$

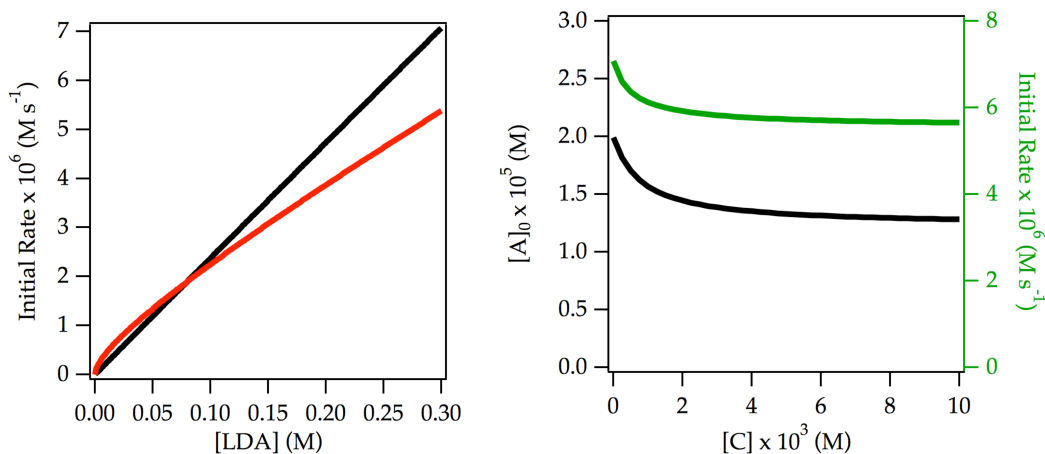

**Figure 49.** (a) Plot of initial rate vs [LDA]; (b) Plot of steady state  $[A]_0$  and initial rate vs [C] at [LDA] = 0.30 M. The traces are produced by numerical integration of the differential equations described in Scheme 1 with  $k_1 = 0.0005$ ,  $k_{-1} = 0.5$ ,  $k_2 = 1 \times 10^{-10}$ ,  $k_{-2} = 0.1$ ,  $k_3 = 5$ ,  $k_4 = 30$ ,  $k_5 = 0.005$ , and  $[S]_0 = 0.005 \text{ M}$ . In plot (a), the black trace corresponds to  $[C] = 0$ , and the red trace corresponds to saturation in catalyst. Fitting the traces in plot (a) to  $y = a[\text{LDA}]^n$  provides observed orders (black trace:  $a = 2.34 \times 10^{-5}$ ,  $n = 0.99$ ; red trace:  $a = 1.37 \times 10^{-5}$ ,  $n = 0.78$ ).

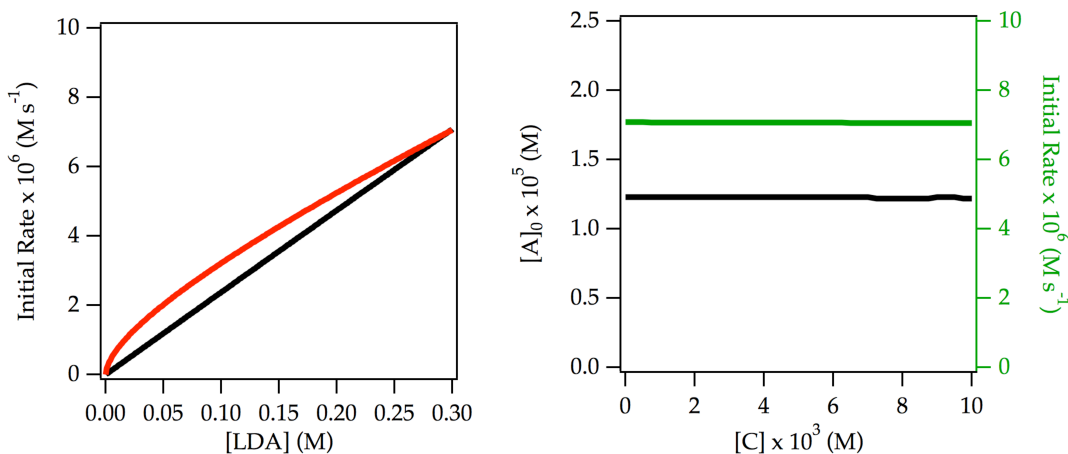

**Figure 50.** (a) Plot of initial rate vs [LDA]; (b) Plot of steady state  $[A]_0$  and initial rate vs [C] at [LDA] = 0.30 M. The traces are produced by numerical integration of the differential equations described in Scheme 1 with  $k_1 = 0.0005$ ,  $k_{-1} = 0.5$ ,  $k_2 = 1 \times 10^{-10}$ ,  $k_{-2} = 0.1$ ,  $k_3 = 5$ ,  $k_4 = 58$ ,  $k_5 = 0.005$ , and  $[S]_0 = 0.005 \text{ M}$ . In plot (a), the black trace corresponds to  $[C] = 0$ , and the red trace corresponds to saturation in catalyst. Fitting the traces in plot (a) to  $y = a[\text{LDA}]^n$  provides observed orders (black trace:  $a = 2.35 \times 10^{-5}$ ,  $n = 1.00$ ; red trace:  $a = 1.63 \times 10^{-5}$ ,  $n = 0.70$ ).

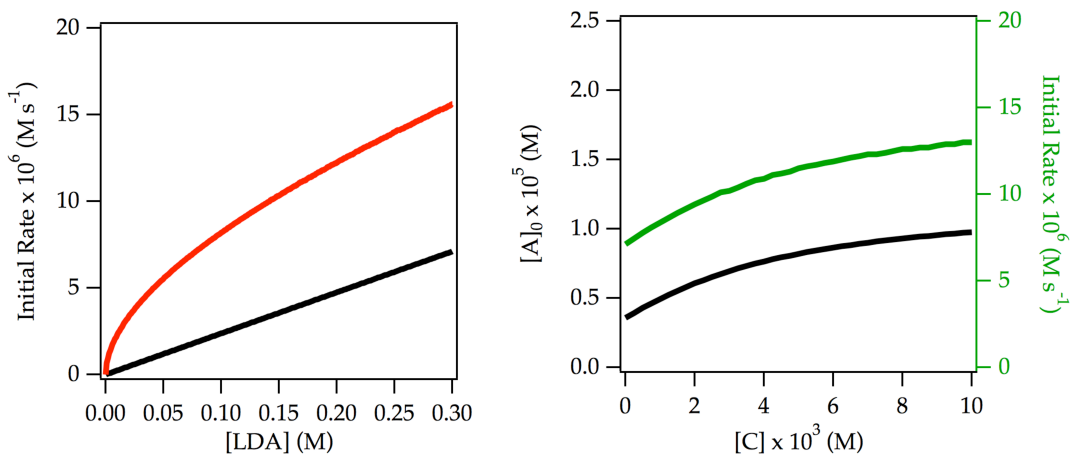

**Figure 51.** (a) Plot of initial rate vs [LDA]; (b) Plot of steady state  $[A]_0$  and initial rate vs [C] at [LDA] = 0.30 M. The traces are produced by numerical integration of the differential equations described in Scheme 1 with  $k_1 = 0.0005$ ,  $k_{-1} = 0.5$ ,  $k_2 = 1 \times 10^{-10}$ ,  $k_{-2} = 0.1$ ,  $k_3 = 5$ ,  $k_4 = 200$ ,  $k_5 = 0.005$ , and  $[S]_0 = 0.005 \text{ M}$ . In plot (a), the black trace corresponds to  $[C] = 0$ , and the red trace corresponds to saturation in catalyst. Fitting the traces in plot (a) to  $y = a[\text{LDA}]^n$  provides observed orders (black trace:  $a = 2.36 \times 10^{-5}$ ,  $n = 1.00$ ; red trace:  $a = 3.11 \times 10^{-5}$ ,  $n = 0.58$ ).

## Part 4: Derivations

**Derivation 1.** Derivation of steady-state rate expressions:

Considering the mechanism depicted in Scheme 1, the rate of consumption of substrate is given by

$$-\frac{d[S]}{dt} = k_3[A_2^*][S] + k_4[A][S] \quad (1)$$

Use the mechanism to derive steady-state concentrations of  $A_2^*$  and  $A$ .

For open dimer  $A_2^*$ ,

$$\begin{aligned} \frac{d[A_2^*]}{dt} &= k_1[A_2] - k_{-1}[A_2^*] - k_3[A_2^*][S] = 0 \\ [A_2^*] &= \frac{k_1[A_2]}{k_{-1} + k_3[S]} \end{aligned} \quad (2)$$

For monomer  $A$ ,

$$\frac{d[A]}{dt} = 2(k_2 + k_5[C])[A_2] - 2(k_{-2} + k_5 \frac{k_{-2}}{k_2}[C])[A]^2 - k_4[A][S] + k_3[A_2^*][S] = 0 \quad (3)$$

Let  $(k_2 + k_5[C]) = x$  and  $(k_{-2} + k_5 \frac{k_{-2}}{k_2}[C]) = y$  so that

$$[A] = \frac{-k_4[S] + \sqrt{(k_4[S])^2 + 8y(2x[A_2] + k_3[A_2^*][S])}}{4y} \quad (4)$$

Insert equations (2) and (4) into (1) to give the rate of consumption of substrate as a function of the observables and microscopic rate constants:

$$-\frac{d[S]}{dt} = \frac{k_1 k_3 [A_2][S]}{k_{-1} + k_3[S]} + k_4 \left( \frac{-k_4[S] + \sqrt{(k_4[S])^2 + 8y \left( 2x[A_2] + \frac{k_1 k_3 [A_2][S]}{k_{-1} + k_3[S]} \right)}}{4y} \right) [S] \quad (5)$$



### Analysis of limiting cases:

No catalyst:

In the absence of catalyst,  $x = k_2$  and  $y = k_{-2}$ , so equation (5) becomes

$$-\frac{d[S]}{dt} = \frac{k_1 k_3 [A_2][S]}{k_{-1} + k_3 [S]} + k_4 \left( \frac{-k_4 [S] + \sqrt{(k_4 [S])^2 + 8k_{-2} \left( 2k_2 [A_2] + \frac{k_1 k_3 [A_2][S]}{k_{-1} + k_3 [S]} \right)}}{4k_{-2}} \right) [S]$$

Assume that the basal deaggregation to monomer is negligible relative to the contribution from dimer metalation, i.e.  $2k_2 [A_2] \ll \frac{k_1 k_3 [A_2][S]}{k_{-1} + k_3 [S]}$ , so that

$$-\frac{d[S]}{dt} = \frac{k_1 k_3 [A_2][S]}{k_{-1} + k_3 [S]} + k_4 \left( \frac{-k_4 [S] + \sqrt{(k_4 [S])^2 + 8k_{-2} \frac{k_1 k_3 [A_2][S]}{k_{-1} + k_3 [S]}}}{4k_{-2}} \right) [S] \quad (6)$$

An altogether different route to a similar end is to assume that the contribution of basal deaggregation to the monomer is negligible in equation (3) by way

of  $2(k_2 + k_5 [C])[A_2] - 2(k_{-2} + k_5 \frac{k_{-2}}{k_2} [C])[A]^2 \ll -k_4 [A][S] + k_3 [A_2^*][S]$ , so that equation (3) becomes

$$[A] = \frac{k_3}{k_4} [A_2^*]$$

and therefore the rate law for consumption of substrate, equation (1), becomes

$$-\frac{d[S]}{dt} = 2 \frac{k_1 k_3 [A_2][S]}{k_{-1} + k_3 [S]} \quad (7)$$

Full catalyst saturation:

With  $[C] \gg 0$ ,  $x \approx k_5[C]$  and  $y \approx k_5 \frac{k_{-2}}{k_2}[C]$ , so equation (5) becomes

$$-\frac{d[S]}{dt} = \frac{k_1 k_3 [A_2][S]}{k_{-1} + k_3 [S]} + k_4 \left( \frac{-k_4 [S] + \sqrt{(k_4 [S])^2 + 8k_5 \frac{k_{-2}}{k_2} [C] \left( 2k_5 [C][A_2] + \frac{k_1 k_3 [A_2][S]}{k_{-1} + k_3 [S]} \right)}}{4k_5 \frac{k_{-2}}{k_2} [C]} \right) [S]$$

Noting that  $2k_5 [C][A_2] \gg \frac{k_1 k_3 [A_2][S]}{k_{-1} + k_3 [S]}$  gives

$$-\frac{d[S]}{dt} = \frac{k_1 k_3 [A_2][S]}{k_{-1} + k_3 [S]} + k_4 \left( \frac{-k_4 [S] + \sqrt{(k_4 [S])^2 + 16(k_5 [C])^2 \frac{k_{-2}}{k_2} [A_2]}}{4k_5 \frac{k_{-2}}{k_2} [C]} \right) [S]$$

Given that the second term under the radical can grow indefinitely, i.e.

$(k_4 [S])^2 \ll 16(k_5 [C])^2 \frac{k_{-2}}{k_2} [A_2]$ , one has

$$-\frac{d[S]}{dt} = \frac{k_1 k_3 [A_2][S]}{k_{-1} + k_3 [S]} + k_4 \left( \sqrt{\frac{k_2}{k_{-2}} [A_2]} \right) [S] \quad (8)$$

## Part 5: Computational Studies

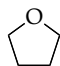

A

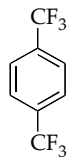

B

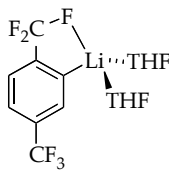

C

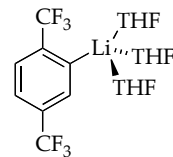

D

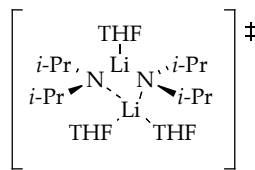

E

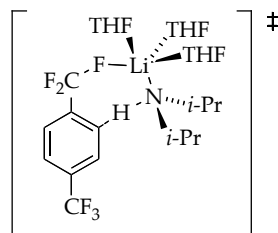

F

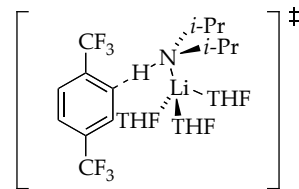

G

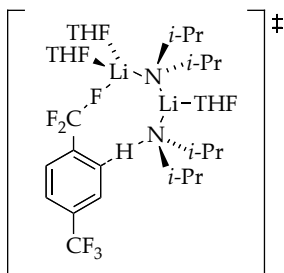

H

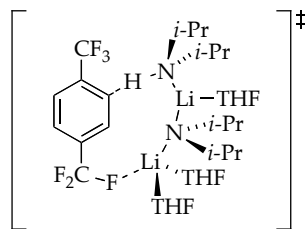

I

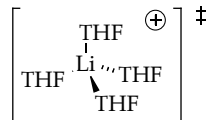

J

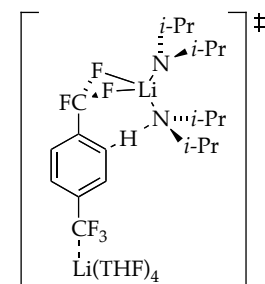

K

**Table 1.** Optimized geometries at B3LYP level of theory with 6-31G(d) basis set for the reactants at  $-78\text{ }^\circ\text{C}$  with free energies (Hartrees) and cartesian coordinates (X, Y, Z) (Note:  $G_{\text{MP2}}$  includes single point MP2 corrections to B3LYP/6-31G(d) optimized structures).

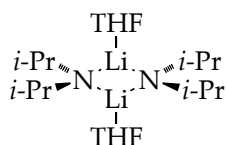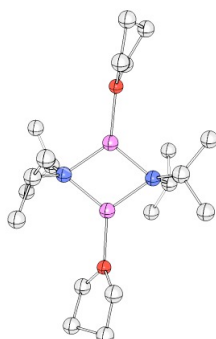

**3**  
 $G = -1063.135501$   
 $G_{\text{MP2}} = -1059.937725$

| Atom | X         | Y         | Z         | Atom | X         | Y         | Z         |
|------|-----------|-----------|-----------|------|-----------|-----------|-----------|
| N    | 0         | 0         | 0         | H    | -0.940577 | -3.291008 | -1.825271 |
| C    | -0.215739 | 0.612452  | 1.318612  | C    | -2.275223 | -4.680069 | -0.904214 |
| C    | 0.984066  | 1.381887  | 1.921761  | H    | -2.504256 | -5.19534  | -1.84738  |
| H    | 1.212505  | 2.284952  | 1.34251   | H    | -2.310069 | -5.431695 | -0.105932 |
| H    | 0.778689  | 1.697923  | 2.953722  | H    | -3.068237 | -3.948858 | -0.708955 |
| H    | 1.882702  | 0.753584  | 1.932942  | C    | 0.182248  | -5.031842 | -1.330903 |
| C    | -1.475882 | 1.513412  | 1.414833  | H    | 0.292339  | -5.788992 | -0.544657 |
| H    | -1.662511 | 1.833942  | 2.448825  | H    | -0.066363 | -5.560021 | -2.261741 |
| H    | -1.371101 | 2.42064   | 0.807577  | H    | 1.156355  | -4.547171 | -1.460089 |
| H    | -2.362674 | 0.977827  | 1.055352  | O    | 2.890094  | -2.114628 | -0.276836 |
| H    | -0.400482 | -0.231238 | 2.010144  | C    | 3.52909   | -2.599416 | -1.47886  |
| C    | 0.294364  | 0.950027  | -1.075375 | C    | 5.02417   | -2.634817 | -1.16185  |
| H    | -0.088612 | 1.959024  | -0.838431 | C    | 5.17113   | -1.444535 | -0.201398 |
| C    | 1.804497  | 1.126678  | -1.373756 | C    | 3.871831  | -1.516212 | 0.604784  |
| H    | 1.981395  | 1.865835  | -2.168777 | H    | 3.498476  | -0.537145 | 0.916021  |
| H    | 2.34994   | 1.453509  | -0.48314  | H    | 3.974185  | -2.15728  | 1.489104  |
| H    | 2.239835  | 0.172163  | -1.698457 | H    | 5.220904  | -0.505023 | -0.763636 |
| C    | -0.411394 | 0.5173    | -2.373716 | H    | 6.058482  | -1.507597 | 0.435346  |
| H    | -0.126925 | -0.512599 | -2.63791  | H    | 5.642686  | -2.546191 | -2.059904 |
| H    | -1.500227 | 0.542654  | -2.246722 | H    | 5.286266  | -3.571958 | -0.656761 |
| H    | -0.152964 | 1.159869  | -3.226138 | H    | 3.104737  | -3.577461 | -1.718479 |
| Li   | -1.462938 | -1.378687 | -0.078227 | H    | 3.309896  | -1.905896 | -2.301885 |
| Li   | 0.922415  | -1.791464 | 0.023104  | O    | -3.431996 | -1.14847  | -0.425881 |
| N    | -0.560416 | -3.145972 | 0.199308  | C    | -4.064444 | -1.141073 | -1.728456 |
| C    | -0.522816 | -3.873798 | 1.472891  | C    | -5.569847 | -1.045588 | -1.463002 |
| H    | -0.46329  | -4.963706 | 1.307703  | C    | -5.702828 | -1.732285 | -0.094683 |
| C    | 0.733203  | -3.499287 | 2.286203  | C    | -4.431019 | -1.269572 | 0.614429  |
| H    | 0.750947  | -2.417347 | 2.490329  | H    | -4.055787 | -1.97603  | 1.358533  |
| H    | 0.766551  | -4.00792  | 3.259096  | H    | -4.566131 | -0.288873 | 1.089082  |
| H    | 1.643109  | -3.758699 | 1.732093  | H    | -5.700242 | -2.822319 | -0.210242 |

**Table 1 (Continued).**

|   |           |           |           |   |           |           |           |
|---|-----------|-----------|-----------|---|-----------|-----------|-----------|
| C | -1.771806 | -3.638553 | 2.355096  | H | -6.60968  | -1.447449 | 0.44699   |
| H | -1.728216 | -4.20067  | 3.299517  | H | -6.159851 | -1.526531 | -2.248671 |
| H | -1.859018 | -2.571836 | 2.60852   | H | -5.883179 | 0.002828  | -1.396109 |
| H | -2.683407 | -3.937095 | 1.82658   | H | -3.667369 | -0.297566 | -2.299805 |
| C | -0.893909 | -3.980504 | -0.960233 | H | -3.802081 | -2.073238 | -2.243737 |

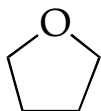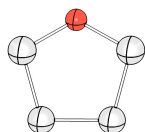

**A**  
 $G = -232.349367$   
 $G_{\text{MP2}} = -231.6694404$

| Atom | X         | Y         | Z         |
|------|-----------|-----------|-----------|
| C    | 0         | 0         | 0         |
| O    | 1.132807  | -0.739653 | -0.442032 |
| C    | 2.264796  | -0.012388 | 0.019216  |
| C    | 1.92285   | 1.47444   | -0.210686 |
| C    | 0.368847  | 1.489728  | -0.185167 |
| H    | -0.032338 | 2.108191  | 0.623792  |
| H    | 2.365524  | 2.11958   | 0.5546    |
| H    | 2.296315  | 1.80941   | -1.183111 |
| H    | 2.436349  | -0.210295 | 1.091379  |
| H    | 3.13745   | -0.361827 | -0.539569 |
| H    | -0.860576 | -0.323589 | -0.591979 |
| H    | -0.206691 | -0.218661 | 1.061467  |
| H    | -0.031366 | 1.878296  | -1.126381 |

**Table 1 (Continued).**

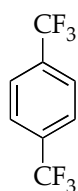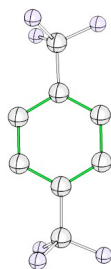

**B**

$G = -906.232925$

$G_{\text{MP2}} = -903.9700518$

| Atom | X         | Y         | Z         |
|------|-----------|-----------|-----------|
| C    | 0         | 0         | 0         |
| C    | -1.505925 | 0.032078  | -0.000082 |
| C    | -2.199386 | 1.240823  | -0.000053 |
| C    | -3.59506  | 1.240823  | -0.000003 |
| C    | -4.288522 | 0.032078  | 0.000028  |
| C    | -3.591787 | -1.182468 | 0.000001  |
| C    | -2.202658 | -1.182468 | -0.000058 |
| H    | -1.656905 | -2.120819 | -0.00011  |
| H    | -4.137541 | -2.120819 | 0.000027  |
| C    | -5.794446 | 0         | 0.000016  |
| F    | -6.272325 | -0.650206 | -1.08545  |
| F    | -6.333334 | 1.236442  | 0.000523  |
| F    | -6.272317 | -0.651108 | 1.084947  |
| H    | -4.139698 | 2.178082  | 0.000014  |
| H    | -1.654749 | 2.178082  | -0.000084 |
| F    | 0.477838  | -0.649702 | 1.085789  |
| F    | 0.477912  | -0.651611 | -1.084607 |
| F    | 0.538888  | 1.236442  | -0.001049 |

**Table 2.** Optimized geometries at B3LYP level of theory with 6-31G(d) basis set for the serial solvation of **C** and **D** at  $-78\text{ }^{\circ}\text{C}$  with free energies (Hartrees) and cartesian coordinates (X, Y, Z) (Note:  $G_{\text{MP2}}$  includes single point MP2 corrections to B3LYP/6-31G(d) optimized structures).

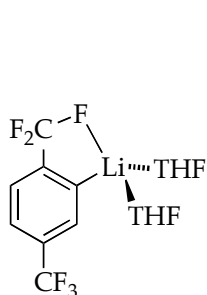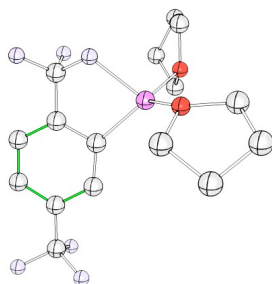

**C**  
 $G = -1377.907053$   
 $G_{\text{MP2}} = -1374.2644$

| Atom | X         | Y         | Z         | Atom | X         | Y         | Z         |
|------|-----------|-----------|-----------|------|-----------|-----------|-----------|
| C    | 0         | 0         | 0         | H    | -1.946008 | -1.583823 | -4.733239 |
| C    | 1.201259  | 0.624969  | -0.64827  | H    | -1.398545 | -1.427745 | -3.047946 |
| C    | 0.980986  | 1.589795  | -1.657516 | H    | -4.160658 | -0.69365  | -4.167982 |
| C    | 2.174286  | 2.061903  | -2.244922 | H    | -3.82412  | -1.701574 | -2.750382 |
| C    | 3.44926   | 1.621147  | -1.867383 | H    | -3.207441 | 0.203343  | -1.412113 |
| C    | 3.598932  | 0.666126  | -0.856026 | H    | -4.308539 | 1.049445  | -2.530166 |
| C    | 2.460508  | 0.162205  | -0.237549 | O    | -1.722611 | 3.803523  | -1.16997  |
| H    | 2.556523  | -0.573166 | 0.557457  | C    | -2.691462 | 4.589891  | -1.906131 |
| H    | 4.586649  | 0.333843  | -0.55483  | C    | -2.320081 | 6.062253  | -1.668289 |
| C    | 4.659727  | 2.143818  | -2.588016 | C    | -0.835645 | 5.981499  | -1.273899 |
| F    | 5.801042  | 1.981985  | -1.876064 | C    | -0.794145 | 4.678078  | -0.482661 |
| F    | 4.55392   | 3.465363  | -2.870052 | H    | -1.135534 | 4.819212  | 0.551779  |
| F    | 4.853472  | 1.515995  | -3.776067 | H    | 0.17629   | 4.176653  | -0.480051 |
| H    | 2.122353  | 2.817238  | -3.029464 | H    | -0.49899  | 6.841469  | -0.687676 |
| Li   | -1.039707 | 2.071383  | -1.723567 | H    | -0.200497 | 5.901973  | -2.163628 |
| O    | -2.282102 | 1.202371  | -2.969336 | H    | -2.909378 | 6.477916  | -0.843113 |
| C    | -3.406388 | 0.432491  | -2.464248 | H    | -2.498726 | 6.680851  | -2.552494 |
| C    | -3.476708 | -0.837133 | -3.323411 | H    | -2.618841 | 4.306236  | -2.961904 |
| C    | -2.030186 | -0.982434 | -3.823317 | H    | -3.69479  | 4.339     | -1.546078 |
| C    | -1.629531 | 0.472492  | -4.042277 | F    | -0.418987 | -1.137038 | -0.621207 |
| H    | -1.994585 | 0.85701   | -5.004514 | F    | 0.17366   | -0.320477 | 1.297214  |
| H    | -0.557482 | 0.662991  | -3.952826 | F    | -1.109484 | 0.839294  | -0.033341 |

**Table 2 (Continued).**

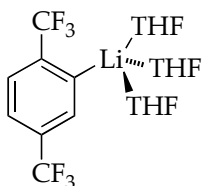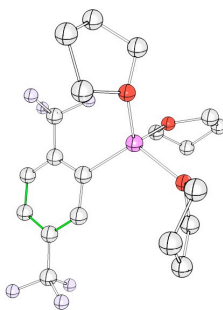

**D**  
 $G = -1610.253454$   
 $G_{MP2} = -1605.959647$

| Atom | X         | Y         | Z         | Atom | X         | Y         | Z         |
|------|-----------|-----------|-----------|------|-----------|-----------|-----------|
| C    | 0         | 0         | 0         | F    | 0.366552  | -0.618982 | -1.166369 |
| C    | -1.280095 | 0.777744  | -0.143239 | F    | 1.069917  | 0.775586  | 0.340894  |
| C    | -1.211102 | 2.128546  | -0.55715  | O    | 0.339579  | 5.194262  | -1.423521 |
| C    | -2.487721 | 2.708636  | -0.73307  | C    | 0.484322  | 5.563751  | -2.803596 |
| C    | -3.696557 | 2.035062  | -0.5222   | C    | -0.952682 | 5.685554  | -3.308691 |
| C    | -3.693431 | 0.699423  | -0.108648 | C    | -1.683865 | 6.30284   | -2.093728 |
| C    | -2.470381 | 0.065916  | 0.078315  | C    | -0.764444 | 5.959471  | -0.894181 |
| H    | -2.445976 | -0.973508 | 0.395015  | H    | -1.245802 | 5.339894  | -0.135117 |
| H    | -4.625732 | 0.168675  | 0.055219  | H    | -0.372807 | 6.867756  | -0.416392 |
| C    | -4.998456 | 2.766185  | -0.673877 | H    | -2.6887   | 5.889505  | -1.972686 |
| F    | -4.93928  | 3.734505  | -1.624208 | H    | -1.782451 | 7.387841  | -2.201678 |
| F    | -5.371621 | 3.388616  | 0.475155  | H    | -1.35118  | 4.690086  | -3.529119 |
| F    | -6.020569 | 1.944214  | -1.01272  | H    | -1.03504  | 6.297717  | -4.211896 |
| H    | -2.561209 | 3.743069  | -1.064474 | H    | 1.018373  | 6.524513  | -2.874874 |
| Li   | 0.604902  | 3.210493  | -0.794735 | H    | 1.082182  | 4.786869  | -3.282257 |
| O    | 1.659833  | 3.649597  | 0.878832  | O    | 1.894954  | 2.578484  | -2.221931 |
| C    | 2.521817  | 4.797625  | 1.052279  | C    | 3.208522  | 2.118959  | -1.831193 |
| C    | 2.442569  | 5.183512  | 2.540536  | C    | 3.303627  | 0.683006  | -2.340909 |
| C    | 1.139185  | 4.509933  | 3.002199  | C    | 2.500775  | 0.761753  | -3.649281 |
| C    | 1.132275  | 3.237774  | 2.159703  | C    | 1.373769  | 1.73643   | -3.287983 |
| H    | 0.144681  | 2.81136   | 1.977896  | H    | 0.489671  | 1.222757  | -2.903315 |
| H    | 1.782908  | 2.464669  | 2.591001  | H    | 1.078644  | 2.381732  | -4.122472 |
| H    | 0.270945  | 5.13138   | 2.7531    | H    | 2.113188  | -0.208441 | -3.972625 |
| H    | 1.117101  | 4.306236  | 4.076968  | H    | 3.12186   | 1.167148  | -4.457056 |
| H    | 2.444167  | 6.267652  | 2.687552  | H    | 2.812253  | 0.004767  | -1.63832  |
| H    | 3.295827  | 4.771253  | 3.091028  | H    | 4.33791   | 0.356232  | -2.485954 |
| H    | 3.539066  | 4.529773  | 0.742782  | H    | 3.966036  | 2.764486  | -2.298782 |
| H    | 2.151686  | 5.584336  | 0.388546  | H    | 3.279844  | 2.212835  | -0.745077 |
| F    | -0.065379 | -0.982949 | 0.930582  |      |           |           |           |



**Table 3.** Optimized geometries of trisolvated LDA open dimer transition state structures at B3LYP level of theory with 6-31G(d) basis set for the ortholithiation of **1** at  $-78\text{ }^{\circ}\text{C}$  with free energies (Hartrees), and cartesian coordinates (X,Y,Z). (Note:  $G_{\text{MP2}}$  includes single point MP2 corrections to B3LYP/6-31G(d) optimized structures)

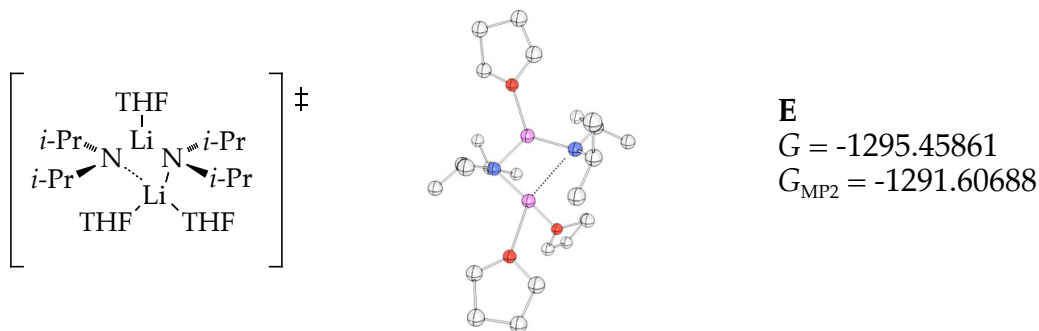

| Atom | X         | Y         | Z         | Atom | X         | Y         | Z        |
|------|-----------|-----------|-----------|------|-----------|-----------|----------|
| C    | 0         | 0         | 0         | C    | -0.297343 | -2.91898  | 4.819492 |
| N    | 0.330915  | -0.051082 | 1.422569  | C    | 1.039513  | -3.303098 | 5.496281 |
| Li   | 0.986676  | -1.672013 | 2.368464  | H    | 1.824191  | -2.582994 | 5.228076 |
| N    | -0.282232 | -2.951862 | 3.349522  | H    | 0.942489  | -3.302802 | 6.590401 |
| Li   | -1.64914  | -1.778369 | 2.432447  | H    | 1.383128  | -4.300321 | 5.20026  |
| O    | -3.075329 | -0.436062 | 2.943572  | C    | -0.708565 | -1.534135 | 5.334881 |
| C    | -2.84135  | 0.979554  | 2.799132  | H    | -1.682181 | -1.232428 | 4.935819 |
| C    | -3.092344 | 1.53698   | 4.198001  | H    | -0.777125 | -1.528438 | 6.430134 |
| C    | -4.263684 | 0.664608  | 4.708739  | H    | 0.02156   | -0.770802 | 5.041526 |
| C    | -4.192193 | -0.612199 | 3.833537  | H    | -1.051191 | -3.623592 | 5.223685 |
| H    | -4.011404 | -1.525555 | 4.405869  | O    | 2.957949  | -2.23587  | 2.144177 |
| H    | -5.108242 | -0.747326 | 3.24293   | C    | 3.839073  | -1.579267 | 1.198093 |
| H    | -4.168411 | 0.434692  | 5.77365   | C    | 5.260195  | -1.938343 | 1.635383 |
| H    | -5.223512 | 1.171845  | 4.566428  | C    | 5.060173  | -3.329132 | 2.255506 |
| H    | -2.202051 | 1.391064  | 4.817817  | C    | 3.712153  | -3.165101 | 2.957009 |
| H    | -3.331755 | 2.60452   | 4.189773  | H    | 3.13656   | -4.089837 | 3.039553 |
| H    | -3.554451 | 1.39297   | 2.068543  | H    | 3.834023  | -2.738861 | 3.960801 |
| H    | -1.822166 | 1.077853  | 2.420136  | H    | 4.995314  | -4.092702 | 1.471043 |
| O    | -3.503113 | -2.916608 | 1.39482   | H    | 5.857543  | -3.617842 | 2.947029 |
| C    | -4.012701 | -4.255303 | 1.589486  | H    | 5.966577  | -1.930488 | 0.799832 |
| C    | -5.258243 | -4.383549 | 0.701005  | H    | 5.62115   | -1.232105 | 2.392805 |
| C    | -5.715985 | -2.924267 | 0.562604  | H    | 3.624822  | -0.508578 | 1.218396 |
| C    | -4.376772 | -2.191292 | 0.507948  | H    | 3.616782  | -1.960727 | 0.195054 |
| H    | -3.959349 | -2.201454 | -0.508403 | C    | 1.178976  | 1.079778  | 1.803019 |
| H    | -4.416882 | -1.157824 | 0.857707  | C    | 1.754242  | 0.887495  | 3.21633  |
| H    | -6.332889 | -2.743613 | -0.323031 | H    | 2.356703  | -0.026582 | 3.300152 |
| H    | -6.286983 | -2.614417 | 1.446515  | H    | 2.398485  | 1.728568  | 3.502729 |
| H    | -4.989408 | -4.790007 | -0.280963 | H    | 0.941025  | 0.827574  | 3.950073 |
| H    | -6.016037 | -5.03962  | 1.139706  | C    | 0.502409  | 2.476781  | 1.767272 |
| H    | -4.255821 | -4.377537 | 2.652162  | H    | -0.234466 | 2.572867  | 2.57531  |

**Table 3 (Continued).**

|   |           |           |          |   |           |           |           |
|---|-----------|-----------|----------|---|-----------|-----------|-----------|
| H | -3.230278 | -4.974039 | 1.331682 | H | 1.243737  | 3.277433  | 1.899679  |
| C | 0.001158  | -4.298846 | 2.83583  | H | -0.011352 | 2.663144  | 0.818405  |
| C | -0.899415 | -5.428177 | 3.390368 | H | 2.059852  | 1.173151  | 1.125303  |
| H | -1.959154 | -5.177334 | 3.265482 | C | -1.249688 | -0.837808 | -0.293613 |
| H | -0.703634 | -6.37467  | 2.869043 | H | -2.109656 | -0.454238 | 0.266453  |
| H | -0.727917 | -5.606058 | 4.457096 | H | -1.511508 | -0.825292 | -1.360224 |
| C | -0.071347 | -4.303505 | 1.301159 | H | -1.090417 | -1.888183 | -0.014883 |
| H | 0.615745  | -3.568952 | 0.861903 | C | 1.138208  | -0.456515 | -0.947194 |
| H | 0.200404  | -5.286148 | 0.894782 | H | 1.356435  | -1.522714 | -0.796038 |
| H | -1.083814 | -4.062232 | 0.954224 | H | 0.873604  | -0.31234  | -2.004863 |
| H | 1.037301  | -4.618883 | 3.082845 | H | 2.059933  | 0.106639  | -0.7627   |
| H | -0.253896 | 1.030267  | -0.31996 |   |           |           |           |

**Table 4.** Optimized geometries of monomer-based transition state structures at B3LYP level of theory with 6-31G(d) basis set for the ortholithiation of **1** at  $-78\text{ }^{\circ}\text{C}$  with free energies (Hartrees), and cartesian coordinates (X,Y,Z). (Note:  $G_{\text{MP2}}$  includes single point MP2 corrections to B3LYP/6-31G(d) optimized structures)

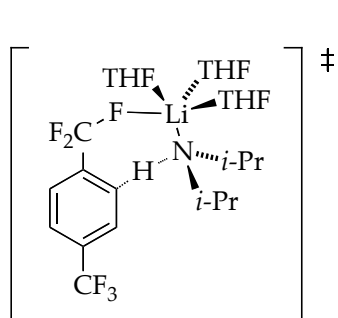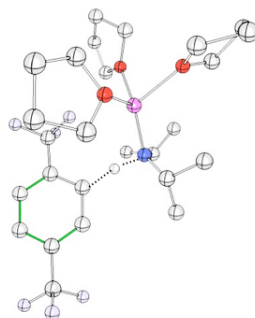

**F**  
 $G = -1902.453745$   
 $G_{\text{MP2}} = -1897.287936$

| Atom | X         | Y         | Z         | Atom | X         | Y         | Z         |
|------|-----------|-----------|-----------|------|-----------|-----------|-----------|
| Li   | 0         | 0         | 0         | H    | -2.065919 | -3.87235  | 0.249237  |
| F    | 1.545013  | -2.09467  | -0.010064 | H    | -2.593875 | -1.516035 | 0.69611   |
| C    | 2.723025  | -2.673943 | -0.388153 | H    | -3.338613 | -1.333845 | -0.909359 |
| C    | 3.906978  | -1.770606 | -0.195866 | H    | -1.050651 | -1.817627 | -2.908917 |
| C    | 5.133265  | -2.395836 | 0.077719  | H    | 0.064761  | -2.718598 | -1.861065 |
| C    | 6.276806  | -1.624194 | 0.247653  | H    | 1.636755  | 0.021042  | -4.262057 |
| C    | 6.171008  | -0.236071 | 0.133428  | C    | 1.84339   | 2.350617  | -0.306742 |
| C    | 4.936436  | 0.357531  | -0.154422 | H    | 2.327134  | 2.016377  | 0.626304  |
| C    | 3.748312  | -0.375753 | -0.333723 | C    | 2.87618   | 3.254637  | -1.020872 |
| H    | 4.912584  | 1.441363  | -0.244333 | H    | 2.421971  | 3.846778  | -1.824528 |
| C    | 7.372433  | 0.635132  | 0.37184   | H    | 3.307515  | 3.965821  | -0.305365 |
| F    | 7.457279  | 1.642404  | -0.528685 | H    | 3.6956    | 2.675098  | -1.456233 |
| F    | 7.33528   | 1.220648  | 1.596325  | C    | 0.651408  | 3.231442  | 0.121434  |
| F    | 8.536185  | -0.054922 | 0.307709  | H    | 0.987217  | 4.053986  | 0.768433  |
| H    | 7.232652  | -2.088904 | 0.463375  | H    | 0.157746  | 3.683874  | -0.747932 |
| H    | 5.195722  | -3.476824 | 0.16629   | H    | -0.094603 | 2.647484  | 0.667591  |
| F    | 2.810607  | -3.82311  | 0.335151  | O    | 0.324454  | -0.524824 | 1.983782  |
| F    | 2.540507  | -3.05922  | -1.680587 | C    | -0.268177 | -1.710266 | 2.559288  |
| N    | 1.487742  | 1.089421  | -1.000472 | C    | 0.590078  | -2.06929  | 3.775015  |
| C    | 1.297753  | 1.207803  | -2.462595 | C    | 1.973899  | -1.555555 | 3.350874  |
| H    | 1.880268  | 2.051607  | -2.860747 | C    | 1.621921  | -0.276548 | 2.59299   |
| C    | -0.166418 | 1.465131  | -2.874902 | H    | 2.328146  | -0.032984 | 1.797328  |
| H    | -0.550239 | 2.389694  | -2.431494 | H    | 1.523621  | 0.582052  | 3.270609  |
| H    | -0.26366  | 1.552554  | -3.966217 | H    | 2.460866  | -2.272095 | 2.681522  |
| H    | -0.812579 | 0.640575  | -2.545417 | H    | 2.642942  | -1.366444 | 4.195444  |
| C    | 1.826433  | -0.043229 | -3.183113 | H    | 0.571777  | -3.141468 | 3.992304  |
| H    | 2.903232  | -0.160956 | -3.031566 | H    | 0.238197  | -1.535417 | 4.665948  |
| H    | 1.346088  | -0.953502 | -2.810677 | H    | -1.308448 | -1.485874 | 2.818293  |
| C    | -0.965957 | -2.386331 | -1.976645 | H    | -0.253994 | -2.507069 | 1.807293  |

**Table 4 (Continued).**

|   |           |           |           |   |           |          |           |
|---|-----------|-----------|-----------|---|-----------|----------|-----------|
| O | -1.258589 | -1.505056 | -0.859361 | O | -1.915811 | 1.040077 | 0.64693   |
| C | -2.551397 | -1.85216  | -0.339885 | C | -2.251395 | 1.351956 | 2.017645  |
| C | -2.645158 | -3.362706 | -0.529296 | C | -3.246808 | 2.513593 | 1.959064  |
| C | -1.985676 | -3.544201 | -1.908359 | C | -3.944322 | 2.270102 | 0.612242  |
| H | -2.73312  | -3.448477 | -2.703394 | C | -2.783013 | 1.771554 | -0.248234 |
| H | -1.505688 | -4.520148 | -2.021936 | H | -2.220461 | 2.606268 | -0.682095 |
| H | -3.673792 | -3.734336 | -0.491216 | H | -3.083197 | 1.098015 | -1.055564 |
| H | -2.704385 | 0.462412  | 2.477073  | H | -4.416227 | 3.166204 | 0.198499  |
| H | -1.329398 | 1.585943  | 2.554625  | H | -4.713757 | 1.494832 | 0.712145  |
| H | 2.538908  | 0.330746  | -0.724475 | H | -2.715507 | 3.472129 | 1.944093  |
| H | -3.932756 | 2.518781  | 2.811489  |   |           |          |           |

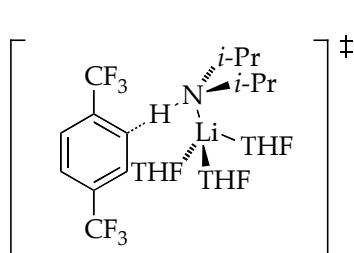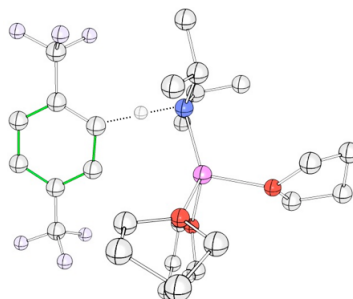

**G**  
 $G = -1902.455318$   
 $G_{\text{MP2}} = -1897.293589$

| Atom | X         | Y         | Z         | Atom | X         | Y         | Z         |
|------|-----------|-----------|-----------|------|-----------|-----------|-----------|
| C    | 0         | 0         | 0         | C    | -3.876154 | 0.70273   | -1.916701 |
| C    | 0.299892  | -1.463765 | 0.091404  | C    | -3.727669 | -0.828191 | -1.926217 |
| C    | 1.61239   | -1.918102 | 0.218953  | H    | -2.685986 | -1.14084  | -2.01999  |
| C    | 1.838176  | -3.29138  | 0.299153  | H    | -4.312059 | -1.301821 | -2.721891 |
| C    | 0.757076  | -4.179009 | 0.254859  | H    | -3.020908 | 1.19448   | -2.387099 |
| C    | -0.587727 | -3.76982  | 0.129538  | H    | -4.781677 | 1.007822  | -2.453794 |
| C    | -0.761339 | -2.380854 | 0.045402  | H    | -3.013453 | 1.099869  | 0.041254  |
| H    | -1.770573 | -1.980281 | -0.061676 | H    | -4.541185 | 1.966565  | -0.230653 |
| C    | 1.039161  | -5.65517  | 0.357437  | H    | -5.828694 | -0.105503 | -0.087245 |
| F    | 0.49165   | -6.353938 | -0.666461 | H    | -4.588237 | -0.403013 | 1.159438  |
| F    | 0.529871  | -6.190681 | 1.501288  | O    | -3.980437 | -2.428127 | 2.271635  |
| F    | 2.363652  | -5.949377 | 0.360663  | C    | -5.043221 | -2.38179  | 3.246818  |
| H    | 2.853442  | -3.663817 | 0.392499  | C    | -4.489764 | -1.571568 | 4.418367  |
| H    | 2.440219  | -1.218113 | 0.251439  | C    | -3.00529  | -1.966497 | 4.396001  |
| F    | -0.669804 | 0.316756  | -1.145341 | C    | -2.714079 | -2.068574 | 2.89717   |
| F    | 1.09754   | 0.782204  | 0.036763  | H    | -1.979431 | -2.833065 | 2.639412  |
| F    | -0.81152  | 0.42245   | 1.018564  | H    | -2.385431 | -1.113707 | 2.473685  |
| H    | -1.837801 | -4.523642 | 0.028017  | H    | -2.862917 | -2.938536 | 4.881931  |

**Table 4 (Continued).**

|    |           |           |           |   |           |           |           |
|----|-----------|-----------|-----------|---|-----------|-----------|-----------|
| N  | -3.060497 | -4.991591 | -0.1361   | H | -2.356157 | -1.240519 | 4.893923  |
| Li | -4.152653 | -3.271043 | 0.337674  | H | -4.98974  | -1.806802 | 5.362772  |
| O  | -6.221207 | -3.47258  | 0.302631  | H | -4.605115 | -0.497467 | 4.229193  |
| C  | -7.017642 | -2.991588 | -0.807364 | H | -5.920946 | -1.937394 | 2.769265  |
| C  | -8.374835 | -3.691416 | -0.688942 | H | -5.29178  | -3.406774 | 3.555017  |
| C  | -8.002018 | -5.010728 | 0.004644  | C | -3.126924 | -5.42712  | -1.546554 |
| C  | -6.909467 | -4.556565 | 0.971179  | H | -2.341034 | -6.175635 | -1.748257 |
| H  | -6.173524 | -5.329581 | 1.202617  | C | -4.471962 | -6.06225  | -1.947182 |
| H  | -7.3379   | -4.177402 | 1.909155  | H | -4.460039 | -6.36061  | -3.003587 |
| H  | -7.594697 | -5.724473 | -0.719494 | H | -4.71173  | -6.953124 | -1.35763  |
| H  | -8.844208 | -5.484071 | 0.517978  | H | -5.287907 | -5.339995 | -1.810399 |
| H  | -8.853807 | -3.833704 | -1.662058 | C | -2.843254 | -4.246362 | -2.482095 |
| H  | -9.055571 | -3.107342 | -0.058211 | H | -2.777546 | -4.58577  | -3.523432 |
| H  | -7.082745 | -1.902486 | -0.741097 | H | -3.652461 | -3.50707  | -2.427902 |
| H  | -6.505035 | -3.255885 | -1.739625 | H | -1.903486 | -3.750518 | -2.225313 |
| O  | -4.212397 | -1.305235 | -0.639795 | C | -3.291935 | -6.109047 | 0.812636  |
| C  | -4.747139 | -0.190221 | 0.102434  | C | -2.940285 | -5.661986 | 2.239296  |
| C  | -4.001999 | 1.033193  | -0.420801 | H | -3.478314 | -4.749375 | 2.512627  |
| H  | -1.464142 | -7.28593  | 0.509809  | H | -3.200524 | -6.443564 | 2.963899  |
| H  | -2.785326 | -8.167215 | 1.293849  | H | -1.866419 | -5.467211 | 2.325476  |
| H  | -2.833991 | -7.870045 | -0.4436   | H | -4.368841 | -6.370537 | 0.814995  |
| C  | -2.546347 | -7.430239 | 0.51626   |   |           |           |           |

**Table 5.** Optimized geometries of dimer-based transition state structures at B3LYP level of theory with 6-31G(d) basis set for the ortholithiation of **1** at  $-78\text{ }^{\circ}\text{C}$  with free energies (Hartrees), and cartesian coordinates (X,Y,Z). (Note:  $G_{\text{MP2}}$  includes single point MP2 corrections to B3LYP/6-31G(d) optimized structures)

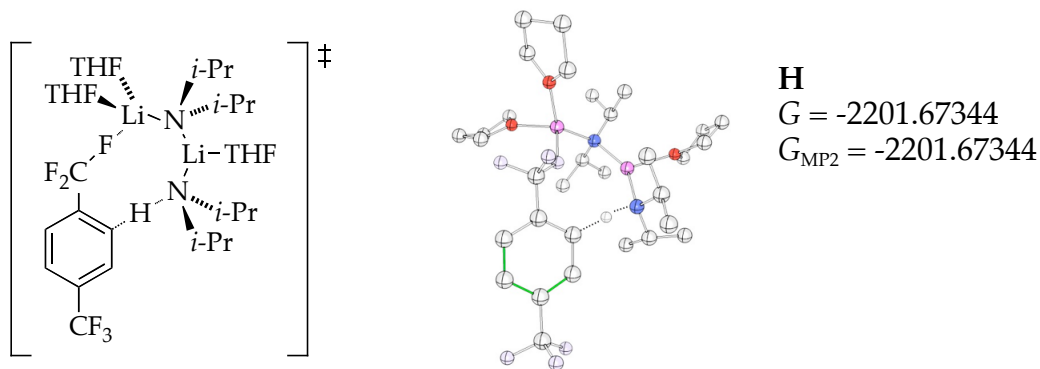

| Atom | X         | Y         | Z         | Atom | X         | Y         | Z         |
|------|-----------|-----------|-----------|------|-----------|-----------|-----------|
| Li   | 0         | 0         | 0         | H    | -0.337915 | 5.205289  | 1.975749  |
| F    | 1.919926  | 0.280235  | 0.70689   | H    | 0.521493  | 6.564748  | 1.219138  |
| C    | 2.950701  | -0.393385 | 1.332851  | H    | -2.442735 | 6.30198   | 1.614743  |
| F    | 2.683518  | -1.713842 | 1.15399   | H    | -1.50894  | 7.735416  | 1.183915  |
| F    | 2.77314   | -0.161539 | 2.660499  | C    | -1.758212 | 2.20445   | -0.758713 |
| C    | 4.297248  | 0.024467  | 0.830434  | H    | -1.925654 | 3.201641  | -1.213265 |
| C    | 4.512826  | 1.379568  | 0.513877  | C    | -2.879533 | 1.302861  | -1.328505 |
| C    | 5.83323   | 1.671754  | 0.118908  | H    | -2.81603  | 1.193555  | -2.416481 |
| C    | 6.84356   | 0.706861  | 0.043477  | H    | -2.834204 | 0.29691   | -0.886219 |
| C    | 6.573635  | -0.626014 | 0.367997  | H    | -3.869019 | 1.721781  | -1.102662 |
| C    | 5.287676  | -0.968792 | 0.76603   | C    | -2.009906 | 2.380516  | 0.745909  |
| H    | 5.058998  | -2.00034  | 1.018838  | H    | -1.253383 | 3.02728   | 1.202409  |
| H    | 7.352179  | -1.378307 | 0.301316  | H    | -2.992203 | 2.832959  | 0.933631  |
| C    | 8.241702  | 1.110901  | -0.334923 | H    | -1.982595 | 1.411721  | 1.258729  |
| F    | 8.955395  | 0.077797  | -0.846497 | O    | -0.738235 | -0.708529 | 1.762689  |
| F    | 8.255977  | 2.098939  | -1.259042 | C    | -1.72433  | -1.764999 | 1.823858  |
| F    | 8.941182  | 1.571404  | 0.732371  | C    | -1.906844 | -2.081642 | 3.309658  |
| H    | 6.091672  | 2.693014  | -0.15301  | C    | -1.617936 | -0.722536 | 3.965052  |
| N    | -0.382466 | 1.730717  | -0.98615  | C    | -0.482606 | -0.187676 | 3.093868  |
| C    | -0.083729 | 1.530185  | -2.415489 | H    | 0.495515  | -0.547374 | 3.425938  |
| H    | -0.790095 | 0.810105  | -2.878385 | H    | -0.451839 | 0.902339  | 3.027136  |
| C    | -0.185188 | 2.796865  | -3.297275 | H    | -1.331984 | -0.800893 | 5.017984  |
| H    | 0.025924  | 2.561882  | -4.348686 | H    | -2.496087 | -0.069712 | 3.896264  |
| H    | -1.185988 | 3.241237  | -3.258377 | H    | -1.170908 | -2.825751 | 3.636145  |
| H    | 0.537713  | 3.559702  | -2.977991 | H    | -2.905172 | -2.469368 | 3.533059  |
| C    | 1.311802  | 0.910113  | -2.586781 | H    | -2.655895 | -1.397913 | 1.372806  |
| H    | 2.089267  | 1.538515  | -2.140167 | H    | -1.357971 | -2.608023 | 1.233588  |
| H    | 1.368502  | -0.075823 | -2.112993 | O    | -0.141257 | -1.826551 | -1.001426 |

Table 5 (Continued).

|    |           |          |           |   |           |           |           |
|----|-----------|----------|-----------|---|-----------|-----------|-----------|
| H  | 1.555495  | 0.780663 | -3.648856 | C | 0.862532  | -2.876649 | -0.99454  |
| Li | 0.947642  | 3.177182 | -0.211144 | C | 0.405973  | -3.910349 | -2.029645 |
| N  | 2.845883  | 3.604032 | 0.517146  | C | -0.440419 | -3.064496 | -2.992743 |
| C  | 3.655473  | 4.494704 | -0.345689 | C | -1.120928 | -2.093783 | -2.031855 |
| H  | 4.707417  | 4.502858 | -0.005585 | H | -2.011417 | -2.54564  | -1.571629 |
| C  | 3.205543  | 5.967879 | -0.368617 | H | -1.400433 | -1.140335 | -2.482103 |
| H  | 3.302806  | 6.451187 | 0.609603  | H | -1.157437 | -3.653197 | -3.572607 |
| H  | 3.818943  | 6.541246 | -1.075339 | H | 0.201324  | -2.516617 | -3.691985 |
| H  | 2.158101  | 6.044801 | -0.682421 | H | -0.213339 | -4.682708 | -1.558162 |
| C  | 3.667296  | 3.947748 | -1.778389 | H | 1.250707  | -4.406953 | -2.515575 |
| H  | 3.981278  | 2.90039  | -1.80043  | H | 1.824557  | -2.426879 | -1.25926  |
| H  | 2.669491  | 4.014418 | -2.233046 | H | 0.936851  | -3.279688 | 0.018769  |
| H  | 4.355326  | 4.52249  | -2.410854 | H | 3.561778  | 2.48217   | 0.539386  |
| C  | 2.776665  | 4.080999 | 1.915761  | H | 4.664267  | 3.257608  | 2.668744  |
| H  | 2.309383  | 5.079827 | 1.944998  | O | -0.183386 | 5.09359   | -0.065337 |
| C  | 1.870586  | 3.153951 | 2.738974  | C | -0.747256 | 5.870739  | -1.131911 |
| H  | 0.874429  | 3.055764 | 2.285471  | H | -0.040653 | 6.662914  | -1.424589 |
| H  | 2.298271  | 2.152028 | 2.822439  | H | -0.905914 | 5.204723  | -1.979833 |
| H  | 1.731518  | 3.546969 | 3.754319  | C | -2.029614 | 6.459946  | -0.538128 |
| C  | 4.140554  | 4.218392 | 2.631635  | H | -2.845405 | 5.736285  | -0.629988 |
| H  | 4.796221  | 4.936589 | 2.128065  | H | -2.335211 | 7.382299  | -1.041091 |
| H  | 3.999734  | 4.572122 | 3.66133   | C | -1.658319 | 6.676632  | 0.951228  |
| C  | -0.337462 | 5.888207 | 1.124165  |   |           |           |           |

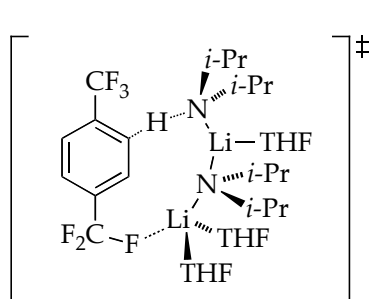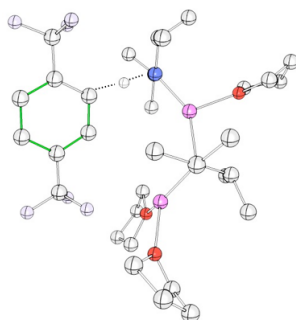

**I**  
 $G = -2201.665013$   
 $G_{\text{MP2}} = -2195.577105$

| Atom | X        | Y         | Z         | Atom | X        | Y        | Z         |
|------|----------|-----------|-----------|------|----------|----------|-----------|
| C    | 0        | 0         | 0         | H    | 3.877434 | 9.389276 | 1.076968  |
| C    | 1.45488  | -0.106454 | -0.314976 | H    | 3.728451 | 7.130643 | 1.953243  |
| C    | 2.283075 | 1.004956  | -0.104262 | H    | 5.410376 | 6.766986 | 1.493931  |
| C    | 3.656507 | 1.004886  | -0.37565  | C    | 1.096047 | 4.878844 | -2.392617 |
| C    | 4.155455 | -0.220953 | -0.866264 | H    | 0.058394 | 5.013884 | -2.766662 |
| C    | 3.356269 | -1.351698 | -1.07627  | C    | 1.493029 | 3.436175 | -2.738672 |

**Table 5 (Continued).**

|    |           |           |           |   |           |          |           |
|----|-----------|-----------|-----------|---|-----------|----------|-----------|
| C  | 1.991261  | -1.298885 | -0.802719 | H | 2.537983  | 3.236593 | -2.479541 |
| H  | 1.359245  | -2.164531 | -0.969415 | H | 0.893718  | 2.697974 | -2.192503 |
| H  | 3.791513  | -2.270834 | -1.455004 | H | 1.370486  | 3.238486 | -3.811434 |
| C  | 5.622704  | -0.31785  | -1.206594 | C | 1.960836  | 5.843186 | -3.235463 |
| F  | 6.417566  | 0.044824  | -0.170401 | H | 1.833649  | 5.645928 | -4.307913 |
| F  | 5.959798  | 0.486542  | -2.247455 | H | 1.699447  | 6.89244  | -3.060703 |
| F  | 6.002703  | -1.573024 | -1.55898  | H | 3.026555  | 5.718973 | -3.002421 |
| H  | 1.829702  | 1.921732  | 0.278045  | C | 0.805291  | 6.44371  | -0.520689 |
| F  | -0.73192  | -1.052509 | -0.41364  | H | 1.565884  | 7.175689 | -0.853084 |
| F  | -0.241246 | 0.142841  | 1.33454   | C | 0.779458  | 6.532147 | 1.012402  |
| F  | -0.567995 | 1.112685  | -0.581934 | H | 0.652912  | 7.568618 | 1.350525  |
| Li | -0.267534 | 3.807717  | -0.268755 | H | -0.049725 | 5.943129 | 1.427112  |
| N  | 1.164378  | 5.073542  | -0.931114 | H | 1.708878  | 6.148136 | 1.447619  |
| Li | 3.202842  | 4.834227  | -0.342831 | C | -0.541645 | 6.98541  | -1.054374 |
| N  | 4.721203  | 3.502482  | 0.147063  | H | -1.37831  | 6.360687 | -0.714347 |
| C  | 5.031494  | 3.519378  | 1.592015  | H | -0.719346 | 8.005258 | -0.688899 |
| C  | 3.723318  | 3.457083  | 2.392253  | H | -0.575013 | 7.019117 | -2.148218 |
| H  | 3.042427  | 4.272061  | 2.111337  | O | -0.856115 | 3.334818 | 1.569641  |
| H  | 3.204041  | 2.508907  | 2.214483  | C | -2.149335 | 2.743598 | 1.86469   |
| H  | 3.914463  | 3.542602  | 3.469449  | C | -2.031187 | 2.128458 | 3.263336  |
| H  | 5.51577   | 4.475727  | 1.85977   | C | -0.909468 | 2.962646 | 3.901455  |
| C  | 5.977441  | 2.398971  | 2.079262  | C | 0.022239  | 3.185188 | 2.714645  |
| H  | 5.558389  | 1.41035   | 1.87135   | H | 0.674707  | 2.321375 | 2.549948  |
| H  | 6.955441  | 2.449383  | 1.590307  | H | 0.631067  | 4.087811 | 2.783559  |
| H  | 6.144929  | 2.485145  | 3.161028  | H | -0.410795 | 2.452589 | 4.730733  |
| C  | 5.927866  | 3.56161   | -0.708933 | H | -1.297388 | 3.919965 | 4.269719  |
| C  | 6.890857  | 4.723074  | -0.403556 | H | -1.727994 | 1.079935 | 3.188536  |
| H  | 6.37445   | 5.686169  | -0.489351 | H | -2.974544 | 2.175944 | 3.815348  |
| H  | 7.321169  | 4.658207  | 0.601661  | H | -2.897534 | 3.544473 | 1.835556  |
| H  | 7.726961  | 4.719023  | -1.114616 | H | -2.378503 | 2.011921 | 1.087935  |
| C  | 5.494286  | 3.628712  | -2.178311 | O | -2.036453 | 3.591229 | -1.312058 |
| H  | 4.818395  | 2.805908  | -2.423884 | C | -2.213477 | 2.863092 | -2.544546 |
| H  | 4.981826  | 4.577115  | -2.395678 | C | -3.056461 | 3.784468 | -3.445277 |
| H  | 6.360883  | 3.560066  | -2.847422 | C | -3.749598 | 4.75372  | -2.447786 |
| H  | 6.512082  | 2.631992  | -0.602417 | C | -3.293688 | 4.243078 | -1.07254  |
| O  | 4.035292  | 6.813113  | -0.063624 | H | -4.00572  | 3.512283 | -0.66098  |
| C  | 4.505509  | 7.315642  | 1.206517  | H | -3.128265 | 5.030418 | -0.334497 |
| C  | 4.79607   | 8.79885   | 0.97939   | H | -4.839791 | 4.747815 | -2.537648 |
| C  | 5.285082  | 8.798712  | -0.476696 | H | -3.40506  | 5.779424 | -2.604968 |
| C  | 4.386795  | 7.73764   | -1.120142 | H | -3.774229 | 3.209344 | -4.037402 |
| H  | 4.883692  | 7.179064  | -1.918709 | H | -2.417974 | 4.336826 | -4.139799 |
| H  | 3.462627  | 8.172941  | -1.518273 | H | -1.223659 | 2.635447 | -2.93814  |
| H  | 6.336353  | 8.49223   | -0.524254 | H | -2.736364 | 1.922103 | -2.326677 |
| H  | 5.192882  | 9.772467  | -0.967024 | H | 4.266891  | 2.291101 | -0.111196 |
| H  | 5.533457  | 9.193231  | 1.684997  |   |           |          |           |



Table 5 (Continued).

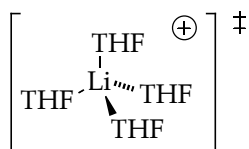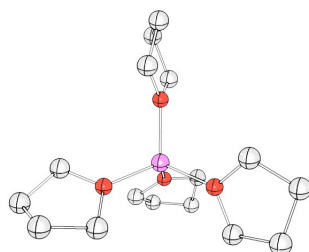

**J**  
 $G = -936.851978$   
 $G_{\text{MP2}} = -934.1446904$

| Atom | X         | Y         | Z         | Atom | X         | Y         | Z         |
|------|-----------|-----------|-----------|------|-----------|-----------|-----------|
| Li   | 0         | 0         | 0         | H    | -2.149322 | 1.360014  | 1.952391  |
| O    | -1.144662 | 0.198341  | -1.583784 | H    | -3.126007 | 0.082431  | 1.188036  |
| C    | -2.266027 | -0.669753 | -1.889826 | H    | -2.244754 | 0.281713  | 4.111398  |
| C    | -3.233358 | 0.194136  | -2.694152 | H    | -3.817297 | -0.240458 | 3.486664  |
| C    | -2.268198 | 1.082764  | -3.494689 | H    | -2.023838 | -2.161565 | 4.219983  |
| C    | -1.137065 | 1.33501   | -2.49278  | H    | -2.868102 | -2.359883 | 2.674355  |
| H    | -1.30352  | 2.242085  | -1.901185 | H    | -0.574485 | -2.37367  | 1.87507   |
| H    | -0.150424 | 1.395803  | -2.96245  | H    | -0.061385 | -1.22254  | 3.136545  |
| H    | -2.726206 | 2.012594  | -3.841897 | O    | 1.248352  | -1.490122 | -0.303631 |
| H    | -1.89292  | 0.543866  | -4.371491 | C    | 2.438788  | -1.778754 | 0.478115  |
| H    | -3.853719 | 0.800389  | -2.024102 | C    | 2.9693    | -3.112277 | -0.049936 |
| H    | -3.89651  | -0.40046  | -3.328057 | C    | 2.528907  | -3.075513 | -1.521572 |
| H    | -1.90499  | -1.524549 | -2.476451 | C    | 1.157422  | -2.409918 | -1.426419 |
| H    | -2.66937  | -1.036861 | -0.942332 | H    | 0.367328  | -3.141381 | -1.214007 |
| O    | 1.004177  | 1.651159  | 0.331102  | H    | 0.877839  | -1.832653 | -2.311274 |
| C    | 2.164628  | 2.100408  | -0.420458 | H    | 2.478552  | -4.066127 | -1.981308 |
| C    | 2.491539  | 3.495199  | 0.113757  | H    | 3.214918  | -2.459861 | -2.114295 |
| C    | 2.016898  | 3.403227  | 1.572368  | H    | 2.493874  | -3.95013  | 0.472418  |
| C    | 0.753912  | 2.554012  | 1.442173  | H    | 4.051254  | -3.206039 | 0.075205  |
| H    | -0.122744 | 3.168683  | 1.200723  | H    | 3.159331  | -0.966262 | 0.324596  |
| H    | 0.531655  | 1.947891  | 2.32427   | H    | 2.156801  | -1.804335 | 1.534784  |
| H    | 1.816528  | 4.378903  | 2.022881  | O    | -1.139352 | -0.408864 | 1.552755  |
| H    | 2.762987  | 2.889887  | 2.189439  | C    | -0.883468 | -1.508994 | 2.467919  |
| H    | 1.921633  | 4.258314  | -0.427999 | C    | -2.186969 | -1.711595 | 3.237157  |
| H    | 3.553779  | 3.735711  | 0.019551  | C    | -2.739125 | -0.279391 | 3.310447  |
| H    | 2.985022  | 1.394472  | -0.243293 | C    | -2.355933 | 0.285873  | 1.942054  |
| H    | 1.910857  | 2.08539   | -1.48443  |      |           |           |           |

**Table 5 (Continued).**

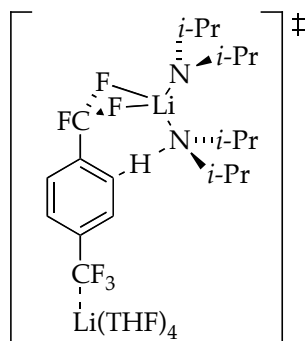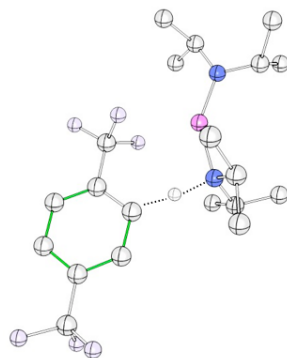

**K**  
 $G = -1497.09314$   
 $G_{\text{MP2}} = -1493.001723$   
 (calculation does not  
 include  $\text{Li}(\text{THF})_4^+$  ion)

| Atom | X         | Y         | Z         | Atom | X         | Y         | Z         |
|------|-----------|-----------|-----------|------|-----------|-----------|-----------|
| C    | 0         | 0         | 0         | H    | 11.869147 | 0.149489  | 1.115158  |
| C    | 1.37859   | -0.58757  | -0.073634 | H    | 11.763527 | 1.878075  | 0.740327  |
| C    | 2.502526  | 0.249372  | -0.07264  | H    | 10.596947 | 1.129298  | 1.862021  |
| C    | 3.815766  | -0.24614  | -0.079696 | C    | 10.991792 | 0.577622  | -1.557262 |
| C    | 3.920775  | -1.648893 | -0.08613  | H    | 11.701643 | -0.260434 | -1.553977 |
| C    | 2.818612  | -2.513172 | -0.094385 | H    | 10.304347 | 0.428791  | -2.39813  |
| C    | 1.533936  | -1.977789 | -0.084975 | H    | 11.570579 | 1.496359  | -1.739515 |
| H    | 0.664859  | -2.627958 | -0.093795 | C    | 6.100362  | 2.141097  | -1.280174 |
| H    | 2.956811  | -3.590439 | -0.108066 | H    | 6.951439  | 2.844865  | -1.264132 |
| C    | 5.305462  | -2.236455 | -0.111286 | C    | 6.352763  | 1.178761  | -2.451157 |
| F    | 5.32963   | -3.582354 | 0.019637  | H    | 5.55363   | 0.432536  | -2.522283 |
| F    | 5.976209  | -1.944282 | -1.257829 | H    | 6.397944  | 1.723023  | -3.403969 |
| F    | 6.093909  | -1.740705 | 0.897038  | H    | 7.30271   | 0.64581   | -2.322263 |
| H    | 4.96277   | 0.595538  | -0.06902  | C    | 4.836196  | 2.986227  | -1.56524  |
| H    | 2.338913  | 1.326666  | -0.075554 | H    | 3.953571  | 2.344291  | -1.67179  |
| F    | -0.940054 | -0.804523 | -0.562904 | H    | 4.634133  | 3.704031  | -0.761625 |
| F    | -0.404406 | 0.208886  | 1.281758  | H    | 4.95209   | 3.558953  | -2.49573  |
| F    | -0.088015 | 1.198922  | -0.623912 | C    | 5.920008  | 2.193611  | 1.186005  |
| N    | 6.055363  | 1.372312  | -0.025767 | H    | 4.955325  | 2.742634  | 1.192054  |
| Li   | 7.48032   | -0.073043 | 0.09975   | C    | 7.026662  | 3.251654  | 1.360545  |
| N    | 9.306302  | -0.475242 | 0.022407  | H    | 6.906699  | 3.782378  | 2.31517   |
| C    | 9.965188  | -1.766056 | 0.121444  | H    | 8.015134  | 2.774941  | 1.35358   |
| H    | 11.06769  | -1.662229 | 0.147091  | H    | 7.011244  | 4.00396   | 0.564005  |
| C    | 9.578846  | -2.497941 | 1.426328  | C    | 5.897955  | 1.27057   | 2.414947  |
| H    | 9.867157  | -1.896318 | 2.295918  | H    | 5.71417   | 1.845585  | 3.332358  |
| H    | 8.491415  | -2.640393 | 1.467823  | H    | 5.114158  | 0.512818  | 2.322655  |
| H    | 10.052734 | -3.48879  | 1.511682  | H    | 6.860573  | 0.753657  | 2.531229  |
| C    | 9.649665  | -2.683818 | -1.086716 | H    | 10.138918 | -3.669072 | -1.01235  |
| H    | 8.566362  | -2.844622 | -1.158118 | C    | 10.191982 | 0.648356  | -0.227765 |
| H    | 9.971194  | -2.209695 | -2.020718 | H    | 9.542522  | 1.536408  | -0.323471 |
| C    | 11.165948 | 0.974363  | 0.938045  |      |           |           |           |

## References

1. *Gaussian 09*, Revision A.1, Frisch, M. J.; Trucks, G. W.; Schlegel, H. B.; Scuseria, G. E.; Robb, M. A.; Cheeseman, J. R.; Scalmani, G.; Barone, V.; Mennucci, B.; Petersson, G. A.; Nakatsuji, H.; Caricato, M.; Li, X.; Hratchian, H. P.; Izmaylov, A. F.; Bloino, J.; Zheng, G.; Sonnenberg, J. L.; Hada, M.; Ehara, M.; Toyota, K.; Fukuda, R.; Hasegawa, J.; Ishida, M.; Nakajima, T.; Honda, Y.; Kitao, O.; Nakai, H.; Vreven, T.; Montgomery, Jr., J. A.; Peralta, J. E.; Ogliaro, F.; Bearpark, M.; Heyd, J. J.; Brothers, E.; Kudin, K. N.; Staroverov, V. N.; Kobayashi, R.; Normand, J.; Raghavachari, K.; Rendell, A.; Burant, J. C.; Iyengar, S. S.; Tomasi, J.; Cossi, M.; Rega, N.; Millam, N. J.; Klene, M.; Knox, J. E.; Cross, J. B.; Bakken, V.; Adamo, C.; Jaramillo, J.; Gomperts, R.; Stratmann, R. E.; Yazyev, O.; Austin, A. J.; Cammi, R.; Pomelli, C.; Ochterski, J. W.; Martin, R. L.; Morokuma, K.; Zakrzewski, V. G.; Voth, G. A.; Salvador, P.; Dannenberg, J. J.; Dapprich, S.; Daniels, A. D.; Farkas, Ö.; Foresman, J. B.; Ortiz, J. V.; Cioslowski, J.; Fox, D. J. Gaussian, Inc., Wallingford CT, 2009.
2. *Gaussview*, Version 3.09, Dennington 2, R.; Keith, T.; Millam, J.; Eppinett, K.; Hovell, W. L.; Gilliland, R.; Semichem, Inc.; Shawnee Mission, KS, 2003.
